# Supplementary material
Source: Research Square preprint supplement (doi:10.21203/rs.3.rs-9566023/v1)
Supplement: Supplementary file 2 [file 3da9c39cd3d209e0fa123820.xlsx]

## Sheet: Intro
Global and National Safe and Just Operating Space for Humanity
SUPPLEMENTARY INFORMATION - A

## Sheet: SI-A1
Blue tabs correspond to SI-A1
These tabs show the applied and estimated values per environmental pressure

## Sheet: A1-Cropland
ISO3	Income group	Population	GDP per capita (PPP, 2017 int $)	Final demand (thousand USD)	Biocapacity (gha)	Biocapacity (gha/cap)	Production footprint (gha)	Domestic use (gha)	Imports (gha)	Exports (gha)	Consumption footprint (gha)	Domestic use (gha/cap)	Imports (gha/cap)	Exports (gha/cap)	Consumption footprint (gha/cap)	Change needed (gha/cap)	Total mod (gha/cap)
ABW	H	108735		2.49667e+06												0
AFE		640058741														0
AFG	L	35688935	2096.09	2.8317e+07	1.44739e+07	0.405556	6.17051e+06	4.26037e+06	646960	1.91014e+06	4.90733e+06	0.119375	0.0181277	0.053522	0.137503	0.0333153	0.170818
AFW		440882906														0
AGO	LM	30234839	7216.06	1.10371e+08	5.19501e+06	0.171822	6.43635e+06	5.86882e+06	1.25561e+06	567526	7.12443e+06	0.194108	0.0415284	0.0187706	0.235636	0	0.235636
ALB	UM	2873457	12773.3	1.41766e+07	1.6048e+06	0.558491	1.13002e+06	347813	298724	782211	646538	0.121043	0.10396	0.272219	0.225003	0	0.225003
AND	H	73763		2.82629e+06												0
ANT				-171000												0
ARB		428315886														0
ARE	H	9223225	71182.4	2.67948e+08	316276	0.0342913	197351	39451.1	7.30865e+06	157899	7.3481e+06	0.00427737	0.792418	0.0171198	0.796696	0	0.796696
ARG	H	44288894	23597.1	6.37765e+08	9.12187e+07	2.05963	1.26725e+08	9.56588e+07	3.69183e+06	3.10663e+07	9.93506e+07	2.15988	0.0833579	0.701446	2.24324	0	2.24324
ARM	UM	2979400	12509.6	1.27971e+07	1.02132e+06	0.342794	695796	478731	244078	217065	722809	0.16068	0.0819219	0.0728554	0.242602	0	0.242602
ASM	UM	51586														0
ATG	H	90468	20777.9	1.30073e+06			3666.79	2238.64	49373.8	1428.15	51612.4	0.0247451	0.54576	0.0157863	0.570505	0	0.570505
AUS	H	24592588	48400.2	1.38225e+09	4.99104e+07	2.02949	7.36722e+07	4.35633e+07	5.78522e+06	3.0109e+07	4.93485e+07	1.7714	0.235243	1.22431	2.00664	-1.67813	0.328509
AUT	H	8797566	54173	3.93906e+08	5.16013e+06	0.586541	4.94393e+06	2.96153e+06	6.192e+06	1.98239e+06	9.15353e+06	0.336631	0.703831	0.225334	1.04046	-0.711953	0.328509
AZE	UM	9854033	14121.4	3.5467e+07	6.15686e+06	0.624806	4.02153e+06	1.37711e+06	653979	2.64442e+06	2.03109e+06	0.139751	0.0663666	0.268359	0.206118	0	0.206118
BDI	L	11506762	750.788	2.51131e+06	3.06219e+06	0.266121	2.67297e+06	2.39047e+06	83484.6	282494	2.47396e+06	0.207745	0.00725526	0.0245503	0.215	0	0.215
BEL	H	11375158	50442.3	4.88195e+08	4.57997e+06	0.40263	3.82823e+06	1.71389e+06	1.20463e+07	2.11434e+06	1.37601e+07	0.15067	1.059	0.185873	1.20967	-0.881157	0.328509
BEN	L	12039780	2933.84	9.71682e+06	4.69793e+06	0.390201	5.90668e+06	3.16141e+06	218871	2.74526e+06	3.38028e+06	0.262581	0.018179	0.228016	0.28076	0	0.28076
BFA	L	19894407	1978.15	1.49578e+07	7.93655e+06	0.398934	1.11592e+07	4.33166e+06	957590	6.82754e+06	5.28925e+06	0.217733	0.0481336	0.343189	0.265866	0	0.265866
BGD	LM	162186147	4830.78	2.48355e+08	2.11191e+07	0.130215	4.64881e+07	3.11236e+07	2.12188e+06	1.53645e+07	3.32455e+07	0.191901	0.013083	0.0947338	0.204984	0	0.204984
BGR	UM	6803468	21473.8	5.16843e+07	1.24486e+07	1.82974	1.31036e+07	1.656e+06	1.23177e+06	1.14476e+07	2.88776e+06	0.243405	0.18105	1.68261	0.424455	0	0.424455
BHR	H	1501116	48929.4	3.07201e+07	11551.2	0.00769509	11016.7	4704.72	728130	6311.97	732835	0.00313415	0.485059	0.00420485	0.488193	0	0.488193
BHS	H	390485	34357.3	1.20081e+07			19361.2	4134.62	215867	15226.6	220001	0.0105884	0.552817	0.038994	0.563405	0	0.563405
BIH	UM	3428682	13402.4	1.91187e+07	2.2205e+06	0.647625	1.19611e+06	581018	507345	615090	1.08836e+06	0.169458	0.147971	0.179396	0.317429	0	0.317429
BLR	UM	9458989	18356.1	3.25848e+07	1.39834e+07	1.47832	1.0702e+07	1.06656e+06	3.98144e+06	9.63543e+06	5.048e+06	0.112756	0.420916	1.01865	0.533672	0	0.533672
BLZ	UM	373202	8873.75	1.73615e+06	192560	0.515968	217479	46450.6	46951.3	171029	93401.8	0.124465	0.125807	0.458274	0.250272	0	0.250272
BMU	H	63578		5.38289e+06												0
BOL	LM	11344587	8244.93	3.95471e+07	7.55574e+06	0.666021	6.53193e+06	5.76529e+06	1.24031e+06	766632	7.0056e+06	0.508198	0.10933	0.0675769	0.617528	0	0.617528
BRA	UM	204703445	14477.9	1.98362e+09	1.79205e+08	0.875438	2.65199e+08	2.32641e+08	2.01078e+07	3.25577e+07	2.52749e+08	1.13648	0.0982288	0.159048	1.23471	0	1.23471
BRB	H	280171	16199	4.5437e+06	17967.8	0.0641317	16387	6209.54	102443	10177.4	108653	0.0221634	0.365646	0.0363258	0.387809	0	0.387809
BRN	H	432772	60173.1	9.85035e+06	4538.03	0.010486	8311.3	5838.48	143906	2472.82	149745	0.0134909	0.332522	0.00571391	0.346013	0	0.346013
BTN	LM	754335	10986.9	2.76484e+06	219375	0.290819	208766	183695	95461.1	25070.7	279156	0.243519	0.12655	0.0332355	0.370069	0	0.370069
BWA	UM	2266747	14656.8	1.5899e+07	182534	0.0805269	81661.3	37379	179907	44282.3	217286	0.0164901	0.079368	0.0195356	0.0958582	0.0749598	0.170818
CAF	L	4793511	839.6	2.02598e+06	2.0772e+06	0.433336	3.3825e+06	2.66941e+06	47862	713088	2.71728e+06	0.556881	0.00998474	0.148761	0.566866	0	0.566866
CAN	H	36545075	48317.2	1.6111e+09	9.95564e+07	2.72421	1.05799e+08	5.13946e+07	2.43015e+07	5.44045e+07	7.56961e+07	1.40633	0.664974	1.48869	2.07131	-1.7428	0.328509
CEB		102337501														0
CHE	H	8451840	69103.6	5.97725e+08	1.29368e+06	0.153065	1.33831e+06	1.00164e+06	1.05693e+07	336669	1.15709e+07	0.118512	1.25053	0.0398338	1.36904	-1.04053	0.328509
CHI	H	164319														0
CHL	H	18558868	24546.9	2.68583e+08	6.63954e+06	0.357756	5.95346e+06	3.20784e+06	3.36596e+06	2.74563e+06	6.57379e+06	0.172847	0.181366	0.147941	0.354213	0	0.354213
CHN	UM	1396215000	14243.5	1.14168e+10	4.54115e+08	0.325247	6.98143e+08	6.33286e+08	1.14012e+08	6.48576e+07	7.47298e+08	0.453573	0.081658	0.0464524	0.535231	0	0.535231
CIV	LM	26733372	4750.94	3.35565e+07	1.45199e+07	0.543137	2.56484e+07	3.373e+06	667900	2.22754e+07	4.0409e+06	0.126172	0.0249837	0.833244	0.151156	0.0196623	0.170818
CMR	LM	24128601	3691.09	3.22636e+07	1.46258e+07	0.60616	1.50713e+07	6.35613e+06	380905	8.71513e+06	6.73703e+06	0.263427	0.0157864	0.361195	0.279214	0	0.279214
COD	L	87083398	1023.54	3.57235e+07	1.63289e+07	0.187508	1.72551e+07	1.08771e+07	1.15609e+06	6.37805e+06	1.20332e+07	0.124904	0.0132756	0.0732407	0.13818	0.032638	0.170818
COG	LM	5351011	4073.93	9.44885e+06	1.04467e+06	0.195228	699235	455699	245980	243535	701679	0.0851614	0.0459688	0.045512	0.13113	0.0396878	0.170818
COL	UM	48131078	14334.9	3.25999e+08	2.75595e+07	0.572593	1.23521e+07	9.51005e+06	5.89148e+06	2.84206e+06	1.54015e+07	0.197587	0.122405	0.0590483	0.319991	0	0.319991
COM	L	756669	3240.18													0
CPV	LM	512893	6320.34	1.50369e+06			45694.5	29712.1	60128.5	15982.3	89840.6	0.0579305	0.117234	0.0311612	0.175164	0	0.175164
CRI	UM	4913177	20168.2	5.43295e+07	1.74553e+06	0.355275	1.99025e+06	246621	949765	1.74362e+06	1.19639e+06	0.0501959	0.19331	0.354887	0.243506	0	0.243506
CSS		4366140														0
CUB	UM	11247829	21016	8.88958e+07	6.68218e+06	0.594086	3.20968e+06	1.72841e+06	389367	1.48127e+06	2.11777e+06	0.153666	0.0346171	0.131694	0.188283	0	0.188283
CUW	H	160175														0
CYM	H	64535		4.9647e+06												0
CYP	H	1254275	38422	2.18236e+07			136158	93183.2	612336	42974.4	705519	0.0742925	0.488199	0.0342624	0.562492	-0.233982	0.328509
CZE	H	10594438	38824.9	1.42139e+08	1.04068e+07	0.982286	9.64782e+06	5.35175e+06	4.72531e+06	4.29607e+06	1.00771e+07	0.505147	0.446018	0.405503	0.951165	-0.622656	0.328509
DEU	H	82657002	53071.5	3.24085e+09	4.57365e+07	0.553328	5.49582e+07	3.54635e+07	6.04555e+07	1.94946e+07	9.5919e+07	0.429044	0.731402	0.23585	1.16045	-0.831937	0.328509
DJI	LM	1054841	4451.68	2.35001e+06	2003.57	0.00189941	29677.1	3317.77	136943	26359.3	140261	0.00314528	0.129824	0.0249889	0.132969	0.037849	0.170818
DMA	UM	68496	11511.6													0
DNK	H	5764980	55356.7	2.93781e+08	1.0527e+07	1.82603	1.18628e+07	2.93436e+06	3.4637e+06	8.9284e+06	6.39805e+06	0.508997	0.600817	1.54873	1.10981	-0.781304	0.328509
DOM	UM	10666843	16524.5	7.33187e+07	3.26225e+06	0.305831	3.05517e+06	1.11686e+06	898777	1.93831e+06	2.01564e+06	0.104704	0.0842589	0.181713	0.188963	0	0.188963
DZA	UM	41689299	11809.5	1.78171e+08	1.64098e+07	0.393623	8.31952e+06	7.88072e+06	1.99895e+06	438798	9.87967e+06	0.189035	0.0479488	0.0105254	0.236983	0	0.236983
EAP		2087238522														0
EAR		3274060446														0
EAS		2333475520														0
ECA		244533821														0
ECS		915290996														0
ECU	UM	16759519	11679.4	1.0164e+08	4.99646e+06	0.298127	5.79332e+06	4.5052e+06	1.18382e+06	1.28812e+06	5.68902e+06	0.268815	0.0706356	0.0768591	0.33945	0	0.33945
EGY	LM	103696057	10435.9	2.15257e+08	1.91986e+07	0.185143	2.81615e+07	1.92747e+07	2.6056e+06	8.88679e+06	2.18803e+07	0.185877	0.0251273	0.0857003	0.211004	0	0.211004
EMU		344810179														0
ERI	L	3150347	1585	5.6753e+06	452427	0.143612	533123	466963	68831.2	66159.8	535794	0.148226	0.0218488	0.0210008	0.170075	0.000743385	0.170818
ESP	H	46571232	39528.9	1.24572e+09	3.83199e+07	0.822824	3.58877e+07	2.07697e+07	2.61625e+07	1.5118e+07	4.69322e+07	0.445977	0.561774	0.324621	1.00775	-0.679242	0.328509
EST	H	1317384	33821.9	2.55667e+07	1.84128e+06	1.39768	1.74158e+06	702166	728983	1.03941e+06	1.43115e+06	0.533	0.553357	0.788995	1.08636	-0.757847	0.328509
ETH	L	109666481	1987.97	2.01657e+07	3.31048e+07	0.301868	3.85934e+07	3.80197e+06	1.08855e+06	3.47914e+07	4.89052e+06	0.0346685	0.00992597	0.317247	0.0445945	0.126224	0.170818
EUU		445321060														0
FCS		931222867														0
FIN	H	5508214	47570.1	2.48015e+08	5.32885e+06	0.967437	3.73228e+06	1.72981e+06	2.99616e+06	2.00247e+06	4.72597e+06	0.314043	0.543943	0.363542	0.857986	-0.529477	0.328509
FJI	UM	918759	12822	4.45456e+06	542372	0.590331	147818	36237.9	95401.1	111580	131639	0.0394422	0.103837	0.121446	0.143279	0.0275389	0.170818
FRA	H	66918020	44577.1	2.55492e+09	8.00345e+07	1.19601	8.15591e+07	5.32265e+07	3.90371e+07	2.83326e+07	9.22635e+07	0.795398	0.583357	0.423392	1.37875	-1.05025	0.328509
FRO	H	50180														0
FSM	LM	109481	3522.29													0
GAB	UM	2156900	14478.1	1.00586e+07	782784	0.362921	524739	141989	235504	382750	377494	0.0658303	0.109186	0.177454	0.175017	0	0.175017
GBR	H	65966000	46372.4	2.69118e+09	3.01886e+07	0.457638	3.04774e+07	2.40021e+07	3.15047e+07	6.47531e+06	5.55067e+07	0.363855	0.477589	0.0981614	0.841444	-0.512935	0.328509
GEO	LM	3728004	13589.7	1.83482e+07	599322	0.160762	449150	259797	892606	189354	1.1524e+06	0.0696879	0.239433	0.0507922	0.309121	0	0.309121
GHA	LM	30008354	4929.57	5.61052e+07	1.2678e+07	0.422481	2.19458e+07	2.77133e+06	824707	1.91744e+07	3.59604e+06	0.0923519	0.0274826	0.63897	0.119835	0.0509835	0.170818
GIB	H	34245														0
GIN	L	12385659	2383.58	9.34428e+06	3.77111e+06	0.304474	5.67212e+06	2.52764e+06	233529	3.14449e+06	2.76117e+06	0.204078	0.0188548	0.253881	0.222933	0	0.222933
GLP																0
GMB	L	2342189	1927.04	1.70739e+06	301339	0.128657	255546	213548	45184.9	41997.8	258733	0.0911745	0.0192917	0.017931	0.110466	0.0603518	0.170818
GNB	L	1877072	1872.31		932464	0.496765										0
GNQ	UM	1562396	19617.8		152825	0.0978143										0
GRC	H	10754679	28604.9	2.06818e+08	1.06013e+07	0.985742	1.11993e+07	6.60833e+06	4.09129e+06	4.59095e+06	1.06996e+07	0.614461	0.38042	0.426879	0.994881	-0.666371	0.328509
GRD	UM	115438	14870													0
GRL	H	56172		2.23416e+06												0
GTM	UM	16567357	8322.22	7.77879e+07	5.33278e+06	0.321885	6.61348e+06	2.38164e+06	1.05907e+06	4.23183e+06	3.44071e+06	0.143755	0.063925	0.255432	0.20768	0	0.20768
GUF																0
GUM	H	163490														0
GUY	UM	768479	12193.6	2.95926e+07	1.26487e+06	1.64594	827934	826528	19445	1406.13	845973	1.07554	0.0253032	0.00182975	1.10084	0	1.10084
HIC		1380319892														0
HKG	H	7393200		3.83997e+08			8630.64	4523.66	1.431e+07	4106.98	1.43145e+07	0.000611867	1.93556	0.000555508	1.93618	0	1.93618
HND	LM	9588137	5447.7	2.56293e+07	4.06623e+06	0.42409	3.43447e+06	865468	694111	2.569e+06	1.55958e+06	0.0902645	0.0723927	0.267936	0.162657	0.00816082	0.170818
HPC		779389964														0
HRV	H	4041407	27211.8	5.18563e+07	2.93158e+06	0.725387	3.01534e+06	1.31419e+06	1.01458e+06	1.70115e+06	2.32877e+06	0.325182	0.251046	0.420929	0.576228	-0.247718	0.328509
HTI	L	10817754	3187.79	1.03483e+07	1.75831e+06	0.16254	1.88989e+06	1.201e+06	198265	688887	1.39927e+06	0.111021	0.0183277	0.0636812	0.129349	0.0414689	0.170818
HUN	H	9726756	29501.1	1.28785e+08	1.6312e+07	1.67703	1.65416e+07	5.94382e+06	1.97784e+06	1.05978e+07	7.92166e+06	0.61108	0.20334	1.08955	0.81442	-0.48591	0.328509
IBD		4765998583														0
IBT		6440236993														0
IDA		1674238410														0
IDB		590024074														0
IDN	LM	267346658	10941.9	9.66417e+08	1.35712e+08	0.507626	1.2752e+08	1.03925e+08	8.14511e+06	2.35957e+07	1.1207e+08	0.388726	0.0304665	0.0882589	0.419192	0	0.419192
IDX		1084214336														0
IMN	H	83609														0
IND	LM	1359657400	6112.07	2.52209e+09	3.48347e+08	0.256202	4.79544e+08	4.32499e+08	3.30879e+07	4.70456e+07	4.65587e+08	0.318094	0.0243354	0.034601	0.342429	0	0.342429
INX																0
IRL	H	4827445	77749.2	2.58428e+08	2.48198e+06	0.51414	2.69344e+06	207110	3.57314e+06	2.48633e+06	3.78025e+06	0.0429026	0.740173	0.51504	0.783076	-0.454566	0.328509
IRN	UM	85026754	15163.3	4.26327e+08	3.25055e+07	0.382297	2.97353e+07	2.61634e+07	4.21373e+06	3.57185e+06	3.03772e+07	0.307708	0.0495578	0.0420085	0.357266	0	0.357266
IRQ	UM	39337353	9976.85	1.62521e+08	9.41449e+06	0.239327	4.52414e+06	4.28039e+06	1.73009e+06	243746	6.01048e+06	0.108812	0.0439808	0.0061963	0.152793	0.0180248	0.170818
ISL	H	343400	55638.5	2.10664e+07			9155.49	1216.82	281374	7938.67	282591	0.00354344	0.819377	0.0231179	0.82292	-0.494411	0.328509
ISR	H	8713300	39121.3	3.42809e+08	1.38368e+06	0.158801	1.08308e+06	855442	1.07673e+07	227640	1.16227e+07	0.0981766	1.23573	0.0261256	1.3339	-1.0054	0.328509
ITA	H	60002252	41581.1	1.85219e+09	2.18369e+07	0.363935	2.58306e+07	1.92188e+07	3.38362e+07	6.61183e+06	5.3055e+07	0.320301	0.563915	0.110193	0.884217	-0.555707	0.328509
JAM	UM	2815764	9984.58	1.65937e+07	594156	0.211011	344867	69216.4	309710	275651	378927	0.0245818	0.109992	0.0978955	0.134573	0	0.134573
JOR	UM	10234226	9629.1	4.81345e+07	892941	0.0872504	628556	240353	1.32423e+06	388203	1.56458e+06	0.0234852	0.129392	0.0379318	0.152877	0	0.152877
JPN	H	126972000	41444.2	4.5499e+09	1.23518e+07	0.0972795	1.21286e+07	1.10342e+07	6.4358e+07	1.0944e+06	7.53922e+07	0.0869026	0.506867	0.00861924	0.59377	-0.265261	0.328509
KAZ	UM	18651931	24863	1.41691e+08	3.37314e+07	1.80847	2.89924e+07	2.50057e+07	4.33452e+06	3.9867e+06	2.93403e+07	1.34065	0.23239	0.213742	1.57304	0	1.57304
KEN	LM	49197766	4312.91	8.42449e+07	1.00618e+07	0.204518	1.22942e+07	1.05375e+07	3.84654e+06	1.7567e+06	1.4384e+07	0.214186	0.0781853	0.0357069	0.292372	0	0.292372
KGZ	LM	6306696	5046.69	9.88063e+06	3.49761e+06	0.554586	2.65529e+06	2.32629e+06	464664	328995	2.79096e+06	0.368861	0.0736779	0.0521659	0.442539	0	0.442539
KHM	LM	16073372	3972.72	2.22009e+07	8.50355e+06	0.529046	1.18429e+07	2.06885e+06	500577	9.77408e+06	2.56943e+06	0.128713	0.0311432	0.608091	0.159856	0.0109617	0.170818
KIR	LM	120275	1962.32													0
KNA	H	47050	29333.4													0
KOR	H	51361911	40957.4	1.49666e+09	5.67484e+06	0.110487	6.25481e+06	5.81863e+06	2.61143e+07	436180	3.1933e+07	0.113287	0.508438	0.00849229	0.621725	-0.293215	0.328509
KWT	H	4154812	50007.3	1.01741e+08	111625	0.0268664	96371.3	83626.2	5.4977e+06	12745.1	5.58133e+06	0.0201276	1.32321	0.00306755	1.34334	-1.01483	0.328509
LAC		561957179														0
LAO	LM	7018147	7211.26	1.70701e+07	5.02851e+06	0.716501	6.24462e+06	713368	351966	5.53125e+06	1.06533e+06	0.101646	0.0501509	0.788135	0.151797	0.0190209	0.170818
LBN	UM	6160128	17808.1	6.19899e+07	912820	0.148182	1.027e+06	335268	1.6543e+06	691730	1.98957e+06	0.0544254	0.26855	0.112292	0.322976	0	0.322976
LBR	L	4848925	1533.41	1.47362e+06	694844	0.143299	677754	337207	108672	340547	445879	0.0695426	0.0224116	0.0702315	0.0919541	0.0788639	0.170818
LBY	UM	6738770	24212.9	2.50125e+07			951017	877541	846057	73475.6	1.7236e+06	0.130223	0.125551	0.0109034	0.255773	0	0.255773
LCA	UM	176342	15247.5		25284.2	0.143381										0
LCN		630414986														0
LDC		1008993468														0
LIC		514890519														0
LIE	H	37962		5.11781e+06												0
LKA	LM	21453000	13584.2	8.93941e+07			9.81855e+06	3.29422e+06	2.65582e+06	6.52433e+06	5.95004e+06	0.153555	0.123797	0.304122	0.277353	0	0.277353
LMC		2847931114														0
LMY		6094196886														0
LSO	LM	2157110	2571.69	3.18285e+06	113610	0.0526675	183946	132044	112884	51901.9	244927	0.0612132	0.052331	0.0240609	0.113544	0.0572738	0.170818
LTE		2286095306														0
LTU	H	2842639	33761.9	4.70335e+07	6.10853e+06	2.1489	7.65992e+06	3.35624e+06	1.59003e+06	4.30368e+06	4.94626e+06	1.18068	0.559349	1.51397	1.74003	-1.41152	0.328509
LUX	H	596336	114986	6.21585e+07	242919	0.407353	175072	19710.6	1.24781e+06	155361	1.26752e+06	0.0330528	2.09247	0.260527	2.12552	-1.79701	0.328509
LVA	H	1942248	28673.6	3.012e+07	4.74921e+06	2.44521	3.77823e+06	1.54928e+06	1.41807e+06	2.22896e+06	2.96734e+06	0.797672	0.730115	1.14762	1.52779	-1.19928	0.328509
MAC	H	648400		4.92409e+07			0	0	541160	0	541160	0	0.834609	0	0.834609	0	0.834609
MAF	H	36837														0
MAR	LM	35446392	7921.62	1.12337e+08	1.32084e+07	0.372631	1.49944e+07	4.96447e+06	1.87976e+06	1.00299e+07	6.84423e+06	0.140056	0.053031	0.282961	0.193087	0	0.193087
MCO	H	37678		6.42849e+06												0
MDA	LM	2755189	11651.2	163771	4.58327e+06	1.6635	4.51882e+06	609986	25053.3	3.90883e+06	635039	0.221395	0.00909312	1.41872	0.230488	0	0.230488
MDG	L	26788375	1548.16	1.18818e+07	5.43524e+06	0.202896	5.35516e+06	882252	233202	4.47291e+06	1.11545e+06	0.0329341	0.00870536	0.166972	0.0416395	0.129179	0.170818
MDV	UM	458287	18973.6	4.76728e+06			6505.69	3527.78	156937	2977.91	160465	0.00769776	0.342443	0.00649791	0.350141	0	0.350141
MEA		718887744														0
MEX	UM	123400057	20032.4	1.13688e+09	4.68264e+07	0.379468	4.27409e+07	3.6562e+07	2.97017e+07	6.17893e+06	6.62637e+07	0.296288	0.240694	0.0500723	0.536983	0	0.536983
MHL	UM	46529	4634.94													0
MIC		5579306367														0
MKD	UM	1898657	15709.3	1.16402e+07	1.01741e+06	0.535857	0	0	420001	0	420001	0	0.221209	0	0.221209	0	0.221209
MLI	L	19813011	2153.85	1.69363e+07	8.30769e+06	0.419305	1.17382e+07	6.94734e+06	347936	4.79089e+06	7.29527e+06	0.350645	0.017561	0.241805	0.368206	0	0.368206
MLT	H	467106	43516.6	1.03043e+07	20025.7	0.0428718	33981.8	13075.3	448781	20906.5	461856	0.0279922	0.960769	0.0447575	0.988761	-0.660252	0.328509
MMR	LM	51894938	4312.95	6.73813e+07	2.89542e+07	0.557939	4.37175e+07	2.52148e+07	192480	1.85027e+07	2.54073e+07	0.485882	0.00370904	0.356541	0.489591	0	0.489591
MNA		656767614														0
MNE	UM	625982	19685.8	6.1494e+06	19693.6	0.0314603	33804.5	24556	359693	9248.52	384249	0.0392279	0.574605	0.0147744	0.613833	0	0.613833
MNG	LM	3148917	11431.5	1.18786e+07	1.36867e+06	0.434647	300585	88651	489729	211934	578380	0.0281529	0.155523	0.0673036	0.183676	0	0.183676
MNP	H	49959														0
MOZ	L	28166393	1287.23	1.53891e+07	6.52292e+06	0.231585	6.71607e+06	1.60352e+06	326536	5.11255e+06	1.93005e+06	0.0569302	0.0115931	0.181513	0.0685233	0.102295	0.170818
MRT	LM	4210600	5259.07	5.05199e+06	505784	0.120122	470688	164913	217033	305775	381946	0.039166	0.0515445	0.0726203	0.0907105	0.0801075	0.170818
MTQ																0
MUS	UM	1264887	22148.6	1.25632e+07			185444	97567.3	747827	87877	845394	0.0771352	0.59122	0.0694742	0.668356	0	0.668356
MWI	L	18039715	1454.78	6.47536e+06	7.22002e+06	0.400229	9.9344e+06	4.2835e+06	222568	5.6509e+06	4.50607e+06	0.237448	0.0123377	0.313248	0.249786	0	0.249786
MYS	UM	32355644	25935.1	2.82054e+08	2.21844e+07	0.685643	2.43559e+07	1.95117e+07	1.21548e+07	4.84422e+06	3.16665e+07	0.603038	0.375663	0.149718	0.978701	-0.650191	0.328509
NAC		363217262														0
NAM	UM	2506853	10335.3	1.45917e+07	894695	0.3569	351746	117309	190852	234437	308161	0.0467955	0.0761321	0.0935184	0.122928	0.0478905	0.170818
NCL	H	283546		9.83311e+06			21540.1	17736.5	182552	3803.62	200288	0.0625525	0.643817	0.0134145	0.706369	0	0.706369
NER	L	21435446	1155.97	1.25226e+07	1.61479e+07	0.753329	2.04933e+07	1.64361e+07	957825	4.0572e+06	1.73939e+07	0.766773	0.0446841	0.189275	0.811457	0	0.811457
NGA	LM	200254579	5120.01	3.61253e+08	5.78874e+07	0.289069	1.07179e+08	8.94595e+07	1.65533e+06	1.77194e+07	9.11148e+07	0.446729	0.00826614	0.0884843	0.454995	0	0.454995
NIC	LM	6316231	5915.38	1.50232e+07	3.98571e+06	0.631027	2.64339e+06	573763	290653	2.06962e+06	864416	0.0908394	0.0460168	0.327668	0.136856	0.0339618	0.170818
NLD	H	17131296	55088.6	7.34228e+08	5.68687e+06	0.331958	3.58817e+06	858086	1.8701e+07	2.73008e+06	1.95591e+07	0.0500888	1.09163	0.159362	1.14172	-0.813208	0.328509
NOR	H	5276968	64050.8	3.78071e+08	1.31198e+06	0.248624	1.41314e+06	948552	4.71373e+06	464591	5.66229e+06	0.179753	0.893266	0.0880412	1.07302	-0.74451	0.328509
NPL	L	28011258	3495.53	3.23126e+07	4.62174e+06	0.164996	1.08478e+07	9.04185e+06	495789	1.80591e+06	9.53764e+06	0.322794	0.0176996	0.0644708	0.340493	0	0.340493
NRU	UM	11324	11746.6													0
NZL	H	4813600	42218.5	1.97337e+08	936970	0.194651	1.45699e+06	624808	1.95091e+06	832186	2.57571e+06	0.129801	0.405291	0.172882	0.535091	-0.206582	0.328509
OED		1348127258														0
OMN	H	4537396	34218.4	6.32526e+07	279657	0.0616339	367894	167817	1.15922e+06	200077	1.32704e+06	0.0369853	0.255482	0.0440952	0.292468	0	0.292468
OSS		11989367														0
PAK	LM	223273967	4891.72	3.10839e+08	6.00541e+07	0.26897	5.64093e+07	4.72556e+07	2.00408e+06	9.15363e+06	4.92597e+07	0.211649	0.00897589	0.0409973	0.220624	0	0.220624
PAN	H	4098707	30526.4	5.89437e+07	1.38059e+06	0.336835	613755	145241	1.01395e+06	468513	1.15919e+06	0.0354358	0.247383	0.114308	0.282818	0	0.282818
PER	UM	31324637	12442.7	1.98728e+08	1.48736e+07	0.474821	9.72413e+06	6.96332e+06	2.78041e+06	2.76081e+06	9.74373e+06	0.222295	0.0887611	0.0881353	0.311056	0	0.311056
PHL	LM	108119693	8001.76	3.50039e+08	2.18081e+07	0.201703	3.37668e+07	3.08416e+07	5.87612e+06	2.92519e+06	3.67178e+07	0.285255	0.0543483	0.0270551	0.339603	0	0.339603
PLW	H	17812	17594.7													0
PNG	LM	9178714	3966.95	1.6522e+07	2.15905e+06	0.235224	3.37285e+06	128317	246694	3.24454e+06	375011	0.0139799	0.0268768	0.353485	0.0408566	0.129961	0.170818
POL	H	37974826	29958.1	4.98094e+08	3.1496e+07	0.829393	3.97213e+07	2.35207e+07	9.17154e+06	1.62006e+07	3.26923e+07	0.619377	0.241516	0.426614	0.860893	-0.532384	0.328509
PRE		920568701														0
PRI	H	3410837														0
PRK	L	25817709	790	1.75941e+07	5.23254e+06	0.202673	5.51853e+06	5.20395e+06	97835.3	314578	5.30178e+06	0.201565	0.00378946	0.0121846	0.205354	0	0.205354
PRT	H	10300300	33044.7	2.16065e+08	3.93276e+06	0.38181	3.19196e+06	1.98894e+06	4.83883e+06	1.20301e+06	6.82777e+06	0.193096	0.469775	0.116794	0.662871	-0.334362	0.328509
PRY	UM	6338660	13604.2	3.71772e+07	1.18223e+07	1.86511	1.764e+07	1.18994e+07	1.69508e+06	5.74059e+06	1.35945e+07	1.87728	0.267419	0.905647	2.1447	0	2.1447
PSE	LM	4454805		2.20194e+07			355658	276476	322646	79181.9	599122	0.0620623	0.0724265	0.0177745	0.134489	0	0.134489
PSS		2509999														0
PST		1107161559														0
PYF	H	280087		5.6083e+06			53221.3	38411.4	100764	14809.9	139175	0.137141	0.359759	0.052876	0.4969	0	0.4969
QAT	H	2545820	92177.6	1.48751e+08	53854.3	0.021154	19264.7	15476.7	2.30292e+06	3787.97	2.3184e+06	0.00607927	0.90459	0.00148792	0.910669	0	0.910669
REU																0
ROU	UM	19588715	26948.2	2.14275e+08	2.66519e+07	1.36058	2.99029e+07	2.53193e+07	4.93024e+06	4.58359e+06	3.02495e+07	1.29254	0.251688	0.233991	1.54423	-1.21572	0.328509
RUS	UM	145293260	25926.4	1.38294e+09	2.65675e+08	1.82854	1.70582e+08	1.49603e+08	3.99663e+07	2.09793e+07	1.89569e+08	1.02966	0.275073	0.144393	1.30474	-0.976226	0.328509
RWA	L	12202060	1934.97	1.02272e+07	2.20074e+06	0.180358	3.74848e+06	2.88016e+06	297652	868313	3.17782e+06	0.236039	0.0243936	0.0711612	0.260433	0	0.260433
SAS		1572520427														0
SAU	H	30977355	45795.5	6.40323e+08	1.28625e+07	0.415224	3.04368e+06	2.85457e+06	1.13211e+07	189101	1.41757e+07	0.0921504	0.365464	0.0061045	0.457614	0	0.457614
SDN	LM	42714306	4613.95	1.20908e+08	1.82715e+07	0.427761	1.72297e+07	1.71022e+07	1.20176e+06	127454	1.8304e+07	0.400386	0.0281349	0.00298387	0.428521	0	0.428521
SEN	L	15475002	3259.19	2.27453e+07	5.10173e+06	0.329676	5.7231e+06	2.97934e+06	357450	2.74376e+06	3.33679e+06	0.192526	0.0230985	0.177303	0.215624	0	0.215624
SGP	H	5612253	95310.3	2.5524e+08	1971.68	0.000351317	4760.35	235.397	4.66026e+06	4524.96	4.6605e+06	4.19434e-05	0.830373	0.000806264	0.830415	-0.501905	0.328509
SLB	LM	685672	2625.09		244618	0.356757										0
SLE	L	7379299	1593.48	4.61601e+06	2.14895e+06	0.291213	2.15571e+06	1.8026e+06	132073	353102	1.93468e+06	0.244278	0.0178977	0.0478503	0.262176	0	0.262176
SLV	LM	6213533	8617.92	2.72853e+07	1.16704e+06	0.187822	1.52501e+06	564866	631076	960139	1.19594e+06	0.090909	0.101565	0.154524	0.192474	0	0.192474
SMR	H	33825	58201.5	2.20399e+06												0
SOM	L	14916629	1059.14	1.17565e+06	897921	0.060196	579937	577121	3471.31	2816.7	580592	0.0386897	0.000232714	0.000188829	0.0389225	0.131896	0.170818
SRB	UM	7020858	16614	6.18875e+07	1.07443e+07	1.53034	7.38059e+06	6.77082e+06	2.78465e+06	609761	9.55547e+06	0.964387	0.396625	0.0868499	1.36101	0	1.36101
SSA		971179323														0
SSD	L	10259154	1590	8.33099e+06	3.50045e+06	0.341203	2.91307e+06	2.5554e+06	37381.5	357671	2.59278e+06	0.249085	0.00364372	0.0348635	0.252729	0	0.252729
SSF		1080941647														0
SST		18865506														0
STP	LM	206970	3934.89	455340			51057.3	42016.1	19761.5	9041.11	61777.6	0.203006	0.0954798	0.0436832	0.298486	0	0.298486
SUR	UM	593713	17753.1	3.06744e+06	165895	0.279419	219473	66141.3	71015.4	153332	137157	0.111403	0.119612	0.25826	0.231015	0	0.231015
SVK	H	5439232	30061.6	9.42856e+07	4.58306e+06	0.842593	4.24304e+06	2.44969e+06	3.0823e+06	1.79335e+06	5.53199e+06	0.450375	0.566679	0.329706	1.01705	-0.688544	0.328509
SVN	H	2066388	36507.6	4.40867e+07	717602	0.347274	530052	375739	1.08609e+06	154313	1.46182e+06	0.181834	0.525596	0.0746774	0.70743	-0.37892	0.328509
SWE	H	10057698	51948	5.11806e+08	7.33696e+06	0.729487	7.07814e+06	4.29561e+06	7.17949e+06	2.78253e+06	1.14751e+07	0.427097	0.713831	0.276657	1.14093	-0.812418	0.328509
SWZ	LM	1158195	8213.92	3.36396e+06	301341	0.260181	339837	131237	70388.2	208600	201625	0.113311	0.060774	0.180108	0.174085	0	0.174085
SXM	H	38996														0
SYC	H	95843	28116.7	1.37239e+06			3925.78	554.182	42702.4	3371.6	43256.5	0.00578219	0.445545	0.0351783	0.451327	-0.122818	0.328509
SYR	L	19224668	4189	1.37032e+07	8.75485e+06	0.455397	6.54547e+06	4.32862e+06	126205	2.21685e+06	4.45483e+06	0.22516	0.00656473	0.115313	0.231725	0	0.231725
TCA	H	39913														0
TCD	L	15622759	1579.76	1.01473e+07	5.67825e+06	0.36346	6.04923e+06	3.25345e+06	239935	2.79578e+06	3.49339e+06	0.208251	0.015358	0.178955	0.223609	0	0.223609
TEA		2061449949														0
TEC		458235497														0
TGO	L	8057140	1972.7	4.8761e+06	2.82448e+06	0.350556	2.62251e+06	996859	320784	1.62565e+06	1.31764e+06	0.123724	0.0398136	0.201766	0.163537	0.00728076	0.170818
THA	UM	71160187	17008	3.78247e+08	4.81637e+07	0.676835	5.40843e+07	3.36392e+07	7.97248e+06	2.04452e+07	4.16116e+07	0.472724	0.112036	0.287312	0.58476	0	0.58476
TJK	L	9085946	3236.44	7.60869e+06	2.2626e+06	0.249022	2.59048e+06	1.09822e+06	230779	1.49226e+06	1.32899e+06	0.12087	0.0253995	0.164239	0.146269	0.0245487	0.170818
TKM	UM	6507061	13703.5	3.47107e+07	2.5191e+06	0.387133	3.40742e+06	1.41215e+06	1.18012e+06	1.99528e+06	2.59227e+06	0.217018	0.18136	0.306632	0.398378	0	0.398378
TLA		614776664														0
TLS	LM	1251703	3138.44		258511	0.206527										0
TMN		652312809														0
TON	UM	105356	6256.98													0
TSA		1572520427														0
TSS		1080941647														0
TTO	H	1356633	26213.9	2.10636e+07	56566.9	0.0416965	63947.2	49128.1	408670	14819.1	457799	0.0362133	0.301239	0.0109234	0.337452	-0.00894266	0.328509
TUN	LM	11650498	10874.9	4.30234e+07	5.59964e+06	0.480635	3.93071e+06	1.79258e+06	1.05795e+06	2.13813e+06	2.85053e+06	0.153863	0.0908076	0.183523	0.244671	0	0.244671
TUR	UM	80312698	27582.8	8.42286e+08	6.23248e+07	0.776027	6.20362e+07	4.27928e+07	1.27411e+07	1.92434e+07	5.55339e+07	0.532828	0.158644	0.239605	0.691472	0	0.691472
TUV	UM	10869	4208.92													0
TWN	H		44559	1.70309e+08			2.81653e+06	2.37604e+06	4.38008e+06	440488	6.75612e+06					0
TZA	L	55652890	2458.34	5.43991e+07	2.24541e+07	0.403467	2.59116e+07	1.74303e+07	402237	8.48133e+06	1.78325e+07	0.313196	0.00722761	0.152397	0.320424	0	0.320424
UGA	L	40177388	2128.4	2.80125e+07	1.36805e+07	0.340501	1.2447e+07	5.75744e+06	321404	6.68955e+06	6.07884e+06	0.1433	0.00799963	0.1665	0.1513	0.0195179	0.170818
UKR	LM	45436041	11860.6	1.16268e+08			8.4865e+07	7.56076e+07	5.49183e+06	9.25743e+06	8.10994e+07	1.66404	0.12087	0.203746	1.78491	0	1.78491
UMC		2731375253														0
URY	H	3388438	23107	5.78363e+07	4.40639e+06	1.30042	6.55699e+06	3.90011e+06	1.23828e+06	2.65689e+06	5.13839e+06	1.151	0.365444	0.784104	1.51645	0	1.51645
USA	H	326608609	59914.8	2.0211e+10	5.45201e+08	1.66928	4.34793e+08	3.15461e+08	1.27943e+08	1.19332e+08	4.43405e+08	0.96587	0.391732	0.365366	1.3576	-1.02909	0.328509
USR				49640.9												0
UZB	LM	31819178	6840.71	5.28343e+07	1.5582e+07	0.489703	1.40248e+07	1.07564e+07	1.72965e+06	3.26841e+06	1.24861e+07	0.338048	0.0543588	0.102718	0.392407	0	0.392407
VCT	UM	105663	13633													0
VEN	UM	30565323	11078	3.61697e+08	6.07038e+06	0.198604	3.21034e+06	3.20005e+06	8.82269e+06	10287.2	1.20227e+07	0.104696	0.28865	0.000336563	0.393346	0	0.393346
VGB	H	32699		759120												0
VIR	H	107281														0
VNM	LM	95176977	9050.69	2.6514e+08	3.9086e+07	0.410667	5.29804e+07	3.0703e+07	4.95797e+06	2.22774e+07	3.5661e+07	0.322589	0.0520921	0.234063	0.374681	0	0.374681
VUT	LM	278507	3031.19	667304			237071	114198	32962	122873	147160	0.410038	0.118352	0.441183	0.52839	0	0.52839
WLD		7614748582														0
WSM	UM	205415	6238.8	896124			66261.5	49130	37295	17131.5	86425	0.239174	0.181559	0.0833995	0.420734	0	0.420734
XKX	LM	1791019														0
YEM	L	33090921	2456	2.94875e+07	2.06401e+06	0.0623739	1.68993e+06	1.59126e+06	430963	98671.4	2.02222e+06	0.0480875	0.0130236	0.00298183	0.0611111	0.109707	0.170818
ZAF	UM	57635162	13950.5	3.40026e+08	2.68547e+07	0.465943	1.74153e+07	1.44634e+07	8.26889e+06	2.95191e+06	2.27323e+07	0.250947	0.14347	0.0512171	0.394416	0	0.394416
ZMB	LM	17441320	3395.48	2.51575e+07	6.06164e+06	0.347545	4.59113e+06	1.26284e+06	836737	3.32829e+06	2.09958e+06	0.0724053	0.0479744	0.190828	0.12038	0.0504383	0.170818
ZWE	L	14812482	2331.78	2.40836e+07	3.75192e+06	0.253294	2.72286e+06	2.59244e+06	448152	130422	3.04059e+06	0.175017	0.030255	0.00880487	0.205272	0	0.205272

## Sheet: A1-Pasture
ISO3	Income group	Population	GDP per capita (PPP, 2017 int $)	Final demand (thousand USD)	Biocapacity (gha)	Biocapacity (gha/cap)	Production footprint (gha)	Domestic use (gha)	Imports (gha)	Exports (gha)	Consumption footprint (gha)	Domestic use (gha/cap)	Imports (gha/cap)	Exports (gha/cap)	Consumption footprint (gha/cap)	Change needed (gha/cap)	Total mod (gha/cap)
ABW	H	108735		2.49667e+06												0
AFE		640058741														0
AFG	L	35688935	2096.09	2.8317e+07	6.03952e+06	0.169227	6.03952e+06	4.16993e+06	298406	1.8696e+06	4.46833e+06	0.116841	0.00836129	0.0523859	0.125202	0	0.125202
AFW		440882906														0
AGO	LM	30234839	7216.06	1.10371e+08	2.81703e+07	0.931716	3.89638e+06	3.55282e+06	1.50807e+06	343564	5.06089e+06	0.117507	0.0498785	0.0113632	0.167386	0	0.167386
ALB	UM	2873457	12773.3	1.41766e+07	1.11374e+06	0.387596	1.11374e+06	342802	121150	770940	463952	0.119299	0.0421618	0.268297	0.161461	0	0.161461
AND	H	73763		2.82629e+06												0
ANT				-171000												0
ARB		428315886														0
ARE	H	9223225	71182.4	2.67948e+08	896478	0.0971979	896478	179209	2.50265e+06	717268	2.68186e+06	0.0194302	0.271342	0.0777676	0.290772	0	0.290772
ARG	H	44288894	23597.1	6.37765e+08	5.37391e+07	1.21338	3.52315e+07	2.61592e+07	1.99619e+06	9.07227e+06	2.81554e+07	0.59065	0.0450719	0.204843	0.635722	0	0.635722
ARM	UM	2979400	12509.6	1.27971e+07	825148	0.276951	596080	410123	93415.9	185957	503539	0.137653	0.0313539	0.0624143	0.169007	0	0.169007
ASM	UM	51586														0
ATG	H	90468	20777.9	1.30073e+06			14738.8	8998.26	27701.4	5740.49	36699.6	0.0994635	0.306201	0.0634533	0.405664	0	0.405664
AUS	H	24592588	48400.2	1.38225e+09	1.16967e+08	4.7562	6.05809e+07	3.44675e+07	3.00105e+06	2.61133e+07	3.74686e+07	1.40154	0.122031	1.06184	1.52357	-1.30116	0.222412
AUT	H	8797566	54173	3.93906e+08	3.43047e+06	0.389934	3.43047e+06	2.08226e+06	2.3605e+06	1.34821e+06	4.44276e+06	0.236686	0.268312	0.153248	0.504998	-0.282586	0.222412
AZE	UM	9854033	14121.4	3.5467e+07	2.75409e+06	0.279489	2.75409e+06	943097	179276	1.81099e+06	1.12237e+06	0.0957067	0.0181931	0.183782	0.1139	0	0.1139
BDI	L	11506762	750.788	2.51131e+06	1.34346e+06	0.116754	1.34346e+06	1.20148e+06	61507.5	141985	1.26298e+06	0.104415	0.00534534	0.0123392	0.10976	0	0.10976
BEL	H	11375158	50442.3	4.88195e+08	4.15879e+06	0.365603	4.15879e+06	1.84293e+06	5.35775e+06	2.31586e+06	7.20068e+06	0.162014	0.471005	0.203589	0.633018	-0.410606	0.222412
BEN	L	12039780	2933.84	9.71682e+06	1.12996e+06	0.0938525	1.12996e+06	604787	118026	525177	722814	0.0502324	0.00980304	0.0436201	0.0600354	0.0384609	0.0984964
BFA	L	19894407	1978.15	1.49578e+07	1.14903e+07	0.577565	1.14903e+07	4.46018e+06	773722	7.03012e+06	5.23391e+06	0.224193	0.0388914	0.353372	0.263084	0	0.263084
BGD	LM	162186147	4830.78	2.48355e+08	3.77597e+06	0.0232817	3.77597e+06	2.528e+06	600783	1.24797e+06	3.12878e+06	0.015587	0.00370428	0.0076947	0.0192913	0.0792051	0.0984964
BGR	UM	6803468	21473.8	5.16843e+07	1.19549e+06	0.175718	797841	100829	425367	697012	526196	0.0148203	0.062522	0.102449	0.0773423	0	0.0773423
BHR	H	1501116	48929.4	3.07201e+07	0	0										0
BHS	H	390485	34357.3	1.20081e+07			31303.8	6684.98	95267.2	24618.8	101952	0.0171197	0.243972	0.0630466	0.261091	0	0.261091
BIH	UM	3428682	13402.4	1.91187e+07	1.03129e+06	0.300784	540553	262577	157889	277975	420466	0.0765826	0.0460493	0.0810735	0.122632	0	0.122632
BLR	UM	9458989	18356.1	3.25848e+07	4.71409e+06	0.498371	4.71409e+06	469805	1.61074e+06	4.24428e+06	2.08054e+06	0.0496676	0.170286	0.448704	0.219954	0	0.219954
BLZ	UM	373202	8873.75	1.73615e+06	75498	0.202298	55184.8	11786.7	26227	43398.1	38013.7	0.0315827	0.0702757	0.116286	0.101858	0	0.101858
BMU	H	63578		5.38289e+06												0
BOL	LM	11344587	8244.93	3.95471e+07	2.26135e+07	1.99333	1.85397e+07	1.64364e+07	571471	2.10326e+06	1.70079e+07	1.44883	0.0503739	0.185398	1.49921	0	1.49921
BRA	UM	204703445	14477.9	1.98362e+09	2.1082e+08	1.02988	2.1082e+08	1.90061e+08	1.00598e+07	2.07586e+07	2.00121e+08	0.92847	0.0491433	0.101408	0.977614	0	0.977614
BRB	H	280171	16199	4.5437e+06	57337.2	0.204651	57337.2	21726.8	51818.2	35610.3	73545.1	0.0775485	0.184952	0.127102	0.262501	0	0.262501
BRN	H	432772	60173.1	9.85035e+06	4525.01	0.0104559										0
BTN	LM	754335	10986.9	2.76484e+06	258009	0.342035										0
BWA	UM	2266747	14656.8	1.5899e+07	4.65088e+06	2.05179	1.10185e+06	504351	85733.6	597497	590084	0.2225	0.0378223	0.263592	0.260322	0	0.260322
CAF	L	4793511	839.6	2.02598e+06	4.60628e+06	0.96094	4.60628e+06	3.6352e+06	31575.9	971080	3.66677e+06	0.758358	0.00658722	0.202582	0.764945	0	0.764945
CAN	H	36545075	48317.2	1.6111e+09	1.90248e+07	0.520584	1.90248e+07	8.93435e+06	1.03994e+07	1.00904e+07	1.93337e+07	0.244475	0.284563	0.276109	0.529037	-0.306625	0.222412
CEB		102337501														0
CHE	H	8451840	69103.6	5.97725e+08	2.92311e+06	0.345855	2.92311e+06	2.24296e+06	4.4493e+06	680146	6.69226e+06	0.265382	0.526429	0.0804731	0.791811	-0.569399	0.222412
CHI	H	164319														0
CHL	H	18558868	24546.9	2.68583e+08	7.8833e+06	0.424773	3.25032e+06	1.65449e+06	1.51347e+06	1.59583e+06	3.16796e+06	0.0891483	0.0815496	0.0859874	0.170698	0	0.170698
CHN	UM	1396215000	14243.5	1.14168e+10	1.4761e+08	0.105722	1.06129e+08	9.74863e+07	5.12069e+07	8.64302e+06	1.48693e+08	0.0698218	0.0366755	0.00619032	0.106497	0	0.106497
CIV	LM	26733372	4750.94	3.35565e+07	1.15057e+07	0.430387	640758	84265.6	380533	556493	464799	0.00315207	0.0142344	0.0208164	0.0173865	0.0811099	0.0984964
CMR	LM	24128601	3691.09	3.22636e+07	4.58442e+06	0.189999	4.58442e+06	1.93343e+06	334139	2.65099e+06	2.26756e+06	0.08013	0.0138483	0.109869	0.0939783	0.00451811	0.0984964
COD	L	87083398	1023.54	3.57235e+07	2.05437e+07	0.235909	709608	447315	623498	262294	1.07081e+06	0.00513663	0.00715978	0.00301198	0.0122964	0.0862	0.0984964
COG	LM	5351011	4073.93	9.44885e+06	1.29911e+07	2.42779	278352	181405	135216	96946.8	316622	0.0339011	0.0252693	0.0181175	0.0591705	0.0393259	0.0984964
COL	UM	48131078	14334.9	3.25999e+08	5.57345e+07	1.15797	3.02468e+07	2.26098e+07	3.25374e+06	7.63699e+06	2.58635e+07	0.469755	0.0676016	0.158671	0.537356	0	0.537356
COM	L	756669	3240.18													0
CPV	LM	512893	6320.34	1.50369e+06			65440.4	42551.6	42837.2	22888.8	85388.9	0.0829639	0.0835208	0.0446268	0.166485	0	0.166485
CRI	UM	4913177	20168.2	5.43295e+07	1.78587e+06	0.363486	1.78587e+06	221297	928574	1.56458e+06	1.14987e+06	0.0450414	0.188997	0.318445	0.234038	0	0.234038
CSS		4366140														0
CUB	UM	11247829	21016	8.88958e+07	5.29056e+06	0.470363	5.29056e+06	2.84896e+06	165682	2.44161e+06	3.01464e+06	0.253289	0.0147302	0.217074	0.26802	0	0.26802
CUW	H	160175														0
CYM	H	64535		4.9647e+06												0
CYP	H	1254275	38422	2.18236e+07			96821.5	66262.4	228719	30559	294982	0.0528293	0.182352	0.0243639	0.235181	-0.0127689	0.222412
CZE	H	10594438	38824.9	1.42139e+08	1.44002e+06	0.135922	1.44002e+06	792791	1.65067e+06	647230	2.44346e+06	0.0748308	0.155805	0.0610915	0.230636	-0.0082235	0.222412
DEU	H	82657002	53071.5	3.24085e+09	2.03847e+07	0.246618	2.03847e+07	1.33788e+07	2.53001e+07	7.00591e+06	3.86789e+07	0.16186	0.306085	0.0847588	0.467945	-0.245533	0.222412
DJI	LM	1054841	4451.68	2.35001e+06	499254	0.473298	499254	55814.4	68227.4	443440	124042	0.0529126	0.0646803	0.420385	0.117593	0	0.117593
DMA	UM	68496	11511.6													0
DNK	H	5764980	55356.7	2.93781e+08	3.03297e+06	0.526103	3.03297e+06	750529	1.38494e+06	2.28244e+06	2.13546e+06	0.130188	0.240232	0.395915	0.37042	-0.148008	0.222412
DOM	UM	10666843	16524.5	7.33187e+07	5.41396e+06	0.50755	5.41396e+06	1.97915e+06	441751	3.43481e+06	2.4209e+06	0.185542	0.0414135	0.322008	0.226956	0	0.226956
DZA	UM	41689299	11809.5	1.78171e+08	1.07459e+07	0.257761	5.9232e+06	5.61079e+06	822158	312408	6.43295e+06	0.134586	0.0197211	0.00749373	0.154307	0	0.154307
EAP		2087238522														0
EAR		3274060446														0
EAS		2333475520														0
ECA		244533821														0
ECS		915290996														0
ECU	UM	16759519	11679.4	1.0164e+08	5.42977e+06	0.323981	5.42977e+06	4.17683e+06	683877	1.25294e+06	4.86071e+06	0.249221	0.0408053	0.0747599	0.290027	0	0.290027
EGY	LM	103696057	10435.9	2.15257e+08	0	0	0	0	1.12932e+06	0	1.12932e+06	0	0.0108907	0	0.0108907	0.0876057	0.0984964
EMU		344810179														0
ERI	L	3150347	1585	5.6753e+06	1.1447e+06	0.363356										0
ESP	H	46571232	39528.9	1.24572e+09	1.65591e+07	0.355565	1.65591e+07	9.51369e+06	1.41654e+07	7.0454e+06	2.36791e+07	0.204283	0.304167	0.151282	0.508449	-0.286037	0.222412
EST	H	1317384	33821.9	2.55667e+07	275062	0.208794	275062	113110	201963	161953	315073	0.0858594	0.153306	0.122935	0.239165	-0.0167531	0.222412
ETH	L	109666481	1987.97	2.01657e+07	6.27265e+07	0.571975	6.27265e+07	6.17942e+06	354611	5.65471e+07	6.53403e+06	0.0563474	0.00323354	0.515628	0.0595809	0.0389154	0.0984964
EUU		445321060														0
FCS		931222867														0
FIN	H	5508214	47570.1	2.48015e+08	1.39797e+06	0.253798	1.39797e+06	628526	1.10852e+06	769445	1.73704e+06	0.114107	0.201248	0.13969	0.315355	-0.0929432	0.222412
FJI	UM	918759	12822	4.45456e+06	334145	0.363692	334145	81916.6	67967.6	252229	149884	0.08916	0.0739777	0.274532	0.163138	0	0.163138
FRA	H	66918020	44577.1	2.55492e+09	3.4544e+07	0.516213	3.4544e+07	2.28605e+07	2.10637e+07	1.16835e+07	4.39242e+07	0.341619	0.314769	0.174594	0.656388	-0.433976	0.222412
FRO	H	50180														0
FSM	LM	109481	3522.29													0
GAB	UM	2156900	14478.1	1.00586e+07	2.12106e+06	0.983384	46664.5	12627	108344	34037.5	120971	0.00585422	0.0502314	0.0157808	0.0560856	0.0424107	0.0984964
GBR	H	65966000	46372.4	2.69118e+09	2.3637e+07	0.358321	2.3637e+07	1.89005e+07	1.82974e+07	4.73647e+06	3.71979e+07	0.286519	0.277376	0.0718016	0.563895	-0.341482	0.222412
GEO	LM	3728004	13589.7	1.83482e+07	1.69805e+06	0.455485	990990	569787	263808	421203	833595	0.15284	0.0707639	0.112983	0.223604	0	0.223604
GHA	LM	30008354	4929.57	5.61052e+07	5.62739e+06	0.187527	1.71881e+06	217052	371064	1.50175e+06	588116	0.00723306	0.0123654	0.0500445	0.0195984	0.078898	0.0984964
GIB	H	34245														0
GIN	L	12385659	2383.58	9.34428e+06	8.65733e+06	0.69898	5.41286e+06	2.4121e+06	117092	3.00076e+06	2.52919e+06	0.19475	0.00945383	0.242277	0.204203	0	0.204203
GLP																0
GMB	L	2342189	1927.04	1.70739e+06	420945	0.179723	420945	351765	25894.7	69180.5	377660	0.150186	0.0110558	0.0295367	0.161242	0	0.161242
GNB	L	1877072	1872.31		143637	0.0765219										0
GNQ	UM	1562396	19617.8		95480.5	0.0611116										0
GRC	H	10754679	28604.9	2.06818e+08	2.91479e+06	0.271025	2.91479e+06	1.74951e+06	1.9222e+06	1.16528e+06	3.67171e+06	0.162674	0.178731	0.108351	0.341406	-0.118993	0.222412
GRD	UM	115438	14870													0
GRL	H	56172		2.23416e+06												0
GTM	UM	16567357	8322.22	7.77879e+07	3.88427e+06	0.234453	3.88427e+06	1.3988e+06	780498	2.48547e+06	2.1793e+06	0.0844311	0.0471106	0.150022	0.131542	0	0.131542
GUF																0
GUM	H	163490														0
GUY	UM	768479	12193.6	2.95926e+07	595644	0.775095	150935	150679	10525.3	256.341	161204	0.196074	0.0136963	0.00033357	0.20977	0	0.20977
HIC		1380319892														0
HKG	H	7393200		3.83997e+08			102655	53994.6	5.04098e+06	48660.6	5.09498e+06	0.00730328	0.681841	0.0065818	0.689144	0	0.689144
HND	LM	9588137	5447.7	2.56293e+07	3.38349e+06	0.352883	3.38349e+06	852623	543082	2.53087e+06	1.3957e+06	0.0889247	0.0566411	0.263959	0.145566	0	0.145566
HPC		779389964														0
HRV	H	4041407	27211.8	5.18563e+07	615476	0.152293	499237	217585	397014	281652	614599	0.053839	0.0982366	0.0696915	0.152076	0	0.152076
HTI	L	10817754	3187.79	1.03483e+07	2.92218e+06	0.270128	2.92218e+06	1.85701e+06	99079.7	1.06517e+06	1.95609e+06	0.171663	0.00915899	0.0984648	0.180822	0	0.180822
HUN	H	9726756	29501.1	1.28785e+08	755009	0.0776218	482494	174037	702537	308457	876573	0.0178926	0.0722272	0.0317122	0.0901198	0	0.0901198
IBD		4765998583														0
IBT		6440236993														0
IDA		1674238410														0
IDB		590024074														0
IDN	LM	267346658	10941.9	9.66417e+08	1.41804e+07	0.0530411	4.55075e+06	3.73813e+06	4.04049e+06	812615	7.77862e+06	0.0139823	0.0151133	0.00303955	0.0290956	0.0694007	0.0984964
IDX		1084214336														0
IMN	H	83609														0
IND	LM	1359657400	6112.07	2.52209e+09	1.10551e+08	0.0813081	1.10551e+08	1.01603e+08	1.42501e+07	8.94816e+06	1.15853e+08	0.0747269	0.0104807	0.00658119	0.0852076	0.0132888	0.0984964
INX																0
IRL	H	4827445	77749.2	2.58428e+08	1.34811e+07	2.79259	1.34811e+07	993267	1.60006e+06	1.24878e+07	2.59333e+06	0.205754	0.331451	2.58684	0.537205	-0.314793	0.222412
IRN	UM	85026754	15163.3	4.26327e+08	7.17563e+06	0.0843926	7.17563e+06	6.32992e+06	2.17893e+06	845708	8.50885e+06	0.0744462	0.0256264	0.00994638	0.100073	0	0.100073
IRQ	UM	39337353	9976.85	1.62521e+08	2.43759e+06	0.0619664	2.43759e+06	2.30626e+06	529635	131330	2.8359e+06	0.0586278	0.0134639	0.00333855	0.0720918	0.0264046	0.0984964
ISL	H	343400	55638.5	2.10664e+07			296013	39341.8	124045	256671	163387	0.114565	0.361226	0.74744	0.475791	-0.253379	0.222412
ISR	H	8713300	39121.3	3.42809e+08	78444.2	0.00900282	78444.2	61319.1	1.21282e+07	17125.2	1.21895e+07	0.00703741	1.39192	0.00196541	1.39896	-1.17655	0.222412
ITA	H	60002252	41581.1	1.85219e+09	1.23697e+07	0.206154	1.23697e+07	9.26809e+06	1.50713e+07	3.10162e+06	2.43394e+07	0.154462	0.25118	0.0516917	0.405642	-0.18323	0.222412
JAM	UM	2815764	9984.58	1.65937e+07	294068	0.104436	294068	59020.9	151267	235047	210288	0.0209609	0.0537216	0.0834755	0.0746825	0	0.0746825
JOR	UM	10234226	9629.1	4.81345e+07	493789	0.0482488	493789	188820	418534	304970	607354	0.0184498	0.0408956	0.029799	0.0593454	0	0.0593454
JPN	H	126972000	41444.2	4.5499e+09	959726	0.00755857	0	0	3.77162e+07	0	3.77162e+07	0	0.297044	0	0.297044	-0.0746315	0.222412
KAZ	UM	18651931	24863	1.41691e+08	3.09623e+07	1.66	2.35953e+06	2.01429e+06	750405	345234	2.7647e+06	0.107994	0.040232	0.0185093	0.148226	0	0.148226
KEN	LM	49197766	4312.91	8.42449e+07	2.4745e+07	0.50297	2.4745e+07	2.13083e+07	3.6358e+06	3.43667e+06	2.49441e+07	0.433116	0.0739017	0.0698542	0.507017	0	0.507017
KGZ	LM	6306696	5046.69	9.88063e+06	3.45256e+06	0.547444	1.22287e+06	1.07574e+06	133686	147135	1.20942e+06	0.17057	0.0211975	0.0233299	0.191768	0	0.191768
KHM	LM	16073372	3972.72	2.22009e+07	1.98416e+06	0.123444	0	0	142182	0	142182	0	0.00884582	0	0.00884582	0.0896506	0.0984964
KIR	LM	120275	1962.32													0
KNA	H	47050	29333.4													0
KOR	H	51361911	40957.4	1.49666e+09	3.70601e+06	0.0721548	3.70601e+06	3.49976e+06	8.77105e+06	206246	1.22708e+07	0.0681393	0.170769	0.00401554	0.238909	-0.0164965	0.222412
KWT	H	4154812	50007.3	1.01741e+08	320185	0.0770635	320185	286211	2.48698e+06	33973.9	2.77319e+06	0.0688865	0.598577	0.008177	0.667464	-0.445052	0.222412
LAC		561957179														0
LAO	LM	7018147	7211.26	1.70701e+07	831303	0.11845	75694.5	8647.14	105715	67047.4	114362	0.00123211	0.015063	0.00955343	0.0162951	0.0822012	0.0984964
LBN	UM	6160128	17808.1	6.19899e+07	495739	0.0804755	495739	161836	525462	333903	687298	0.0262716	0.0853005	0.054204	0.111572	0	0.111572
LBR	L	4848925	1533.41	1.47362e+06	1.61135e+06	0.332311	116369	57897.9	69978.3	58471.4	127876	0.0119404	0.0144317	0.0120586	0.0263721	0.0721243	0.0984964
LBY	UM	6738770	24212.9	2.50125e+07			1.28061e+06	1.18167e+06	568851	98940	1.75052e+06	0.175354	0.0844146	0.0146822	0.259769	0	0.259769
LCA	UM	176342	15247.5		282.015	0.00159925										0
LCN		630414986														0
LDC		1008993468														0
LIC		514890519														0
LIE	H	37962		5.11781e+06												0
LKA	LM	21453000	13584.2	8.93941e+07			104576	35086.3	924552	69489.8	959638	0.0016355	0.0430966	0.00323916	0.0447321	0.0537642	0.0984964
LMC		2847931114														0
LMY		6094196886														0
LSO	LM	2157110	2571.69	3.18285e+06	1.4542e+06	0.674144	921623	661579	85156.6	260044	746735	0.306697	0.0394772	0.120552	0.346174	0	0.346174
LTE		2286095306														0
LTU	H	2842639	33761.9	4.70335e+07	864642	0.304169	628425	273030	437827	355395	710857	0.0960481	0.154021	0.125023	0.250069	-0.0276573	0.222412
LUX	H	596336	114986	6.21585e+07	358963	0.601948	358963	40414.1	613479	318549	653893	0.0677707	1.02875	0.534178	1.09652	-0.874106	0.222412
LVA	H	1942248	28673.6	3.012e+07	459453	0.236558	417477	174097	307810	243380	481908	0.089637	0.158481	0.125308	0.248118	-0.0257062	0.222412
MAC	H	648400		4.92409e+07												0
MAF	H	36837														0
MAR	LM	35446392	7921.62	1.12337e+08	5.7687e+06	0.162744	5.73345e+06	1.89828e+06	827517	3.83518e+06	2.72579e+06	0.0535535	0.0233456	0.108197	0.0768991	0.0215973	0.0984964
MCO	H	37678		6.42849e+06												0
MDA	LM	2755189	11651.2	163771	802072	0.291113	331104	44695.1	20256.4	286409	64951.5	0.0162221	0.00735208	0.103953	0.0235742	0.0749221	0.0984964
MDG	L	26788375	1548.16	1.18818e+07	2.87478e+07	1.07314	8.64812e+06	1.42476e+06	118611	7.22336e+06	1.54337e+06	0.0531858	0.00442769	0.269645	0.0576135	0.0408829	0.0984964
MDV	UM	458287	18973.6	4.76728e+06												0
MEA		718887744														0
MEX	UM	123400057	20032.4	1.13688e+09	4.317e+07	0.349838	4.317e+07	3.73064e+07	1.3094e+07	5.86367e+06	5.04003e+07	0.30232	0.10611	0.0475176	0.40843	0	0.40843
MHL	UM	46529	4634.94													0
MIC		5579306367														0
MKD	UM	1898657	15709.3	1.16402e+07	588885	0.310159	0	0	138049	0	138049	0	0.0727087	0	0.0727087	0	0.0727087
MLI	L	19813011	2153.85	1.69363e+07	1.54398e+07	0.779277	1.54398e+07	9.13816e+06	174259	6.30168e+06	9.31241e+06	0.46122	0.0087952	0.318057	0.470015	0	0.470015
MLT	H	467106	43516.6	1.03043e+07	2053.92	0.00439711	0	0	214157	0	214157	0	0.458476	0	0.458476	-0.236064	0.222412
MMR	LM	51894938	4312.95	6.73813e+07	7.69785e+06	0.148335	7.69785e+06	4.43986e+06	92063.2	3.25798e+06	4.53193e+06	0.0855548	0.00177403	0.0627803	0.0873289	0.0111675	0.0984964
MNA		656767614														0
MNE	UM	625982	19685.8	6.1494e+06	214631	0.342871	114015	82821.7	274039	31193.2	356860	0.132307	0.437774	0.0498308	0.570081	0	0.570081
MNG	LM	3148917	11431.5	1.18786e+07	2.31098e+07	7.33897	1.74495e+07	5.14635e+06	126765	1.23031e+07	5.27312e+06	1.63432	0.0402567	3.9071	1.67458	0	1.67458
MNP	H	49959														0
MOZ	L	28166393	1287.23	1.53891e+07	1.9735e+07	0.700659	1.53447e+06	366367	160237	1.1681e+06	526604	0.0130072	0.00568896	0.0414714	0.0186962	0.0798002	0.0984964
MRT	LM	4210600	5259.07	5.05199e+06	1.15606e+07	2.74558	6.23222e+06	2.18355e+06	138074	4.04867e+06	2.32163e+06	0.518585	0.0327921	0.961542	0.551377	0	0.551377
MTQ																0
MUS	UM	1264887	22148.6	1.25632e+07			4043.12	2208.62	560503	1834.49	562712	0.0017461	0.443125	0.00145032	0.444871	0	0.444871
MWI	L	18039715	1454.78	6.47536e+06	1.19111e+06	0.0660273	1.13317e+06	488600	124581	644574	613181	0.0270847	0.0069059	0.0357308	0.0339906	0.0645058	0.0984964
MYS	UM	32355644	25935.1	2.82054e+08	527301	0.016297	66420.9	53509.1	4.43254e+06	12911.8	4.48605e+06	0.00165378	0.136994	0.000399059	0.138648	0	0.138648
NAC		363217262														0
NAM	UM	2506853	10335.3	1.45917e+07	3.7329e+06	1.48908	3.09358e+06	1.03173e+06	83784.8	2.06185e+06	1.11551e+06	0.411563	0.0334223	0.822487	0.444985	0	0.444985
NCL	H	283546		9.83311e+06			173349	142738	129228	30610.4	271966	0.503404	0.455756	0.107956	0.959159	0	0.959159
NER	L	21435446	1155.97	1.25226e+07	1.73378e+07	0.808837	1.73378e+07	1.39053e+07	440900	3.43248e+06	1.43462e+07	0.648706	0.0205687	0.160131	0.669275	0	0.669275
NGA	LM	200254579	5120.01	3.61253e+08	1.88903e+07	0.0943313	1.85658e+07	1.54964e+07	1.09005e+06	3.06939e+06	1.65864e+07	0.0773833	0.00544332	0.0153274	0.0828267	0.0156697	0.0984964
NIC	LM	6316231	5915.38	1.50232e+07	6.30251e+06	0.997827	6.30251e+06	1.368e+06	188978	4.93451e+06	1.55698e+06	0.216584	0.0299194	0.781243	0.246504	0	0.246504
NLD	H	17131296	55088.6	7.34228e+08	7.4064e+06	0.432331	7.4064e+06	1.68521e+06	7.77866e+06	5.72119e+06	9.46387e+06	0.0983702	0.454061	0.333961	0.552431	-0.330019	0.222412
NOR	H	5276968	64050.8	3.78071e+08	1.87814e+06	0.355914	1.87814e+06	1.28927e+06	1.95008e+06	588870	3.23936e+06	0.244321	0.369546	0.111593	0.613867	-0.391455	0.222412
NPL	L	28011258	3495.53	3.23126e+07	6.7721e+06	0.241763	6.7721e+06	5.6447e+06	213218	1.1274e+06	5.85791e+06	0.201515	0.00761187	0.0402482	0.209127	0	0.209127
NRU	UM	11324	11746.6													0
NZL	H	4813600	42218.5	1.97337e+08	2.40526e+07	4.9968	2.40526e+07	1.01699e+07	905240	1.38828e+07	1.10751e+07	2.11273	0.188059	2.88407	2.30079	-2.07838	0.222412
OED		1348127258														0
OMN	H	4537396	34218.4	6.32526e+07	795239	0.175263	795239	362752	534971	432487	897723	0.0799472	0.117903	0.0953161	0.19785	0	0.19785
OSS		11989367														0
PAK	LM	223273967	4891.72	3.10839e+08	6.69219e+07	0.29973	6.69219e+07	5.60624e+07	828960	1.08595e+07	5.68913e+07	0.251092	0.00371275	0.0486377	0.254805	0	0.254805
PAN	H	4098707	30526.4	5.89437e+07	1.9973e+06	0.487299	1.9973e+06	472647	539550	1.52465e+06	1.0122e+06	0.115316	0.131639	0.371983	0.246955	-0.0245429	0.222412
PER	UM	31324637	12442.7	1.98728e+08	1.61114e+07	0.514335	1.61114e+07	1.14209e+07	1.42354e+06	4.69043e+06	1.28445e+07	0.364599	0.0454448	0.149736	0.410044	0	0.410044
PHL	LM	108119693	8001.76	3.50039e+08	1.52709e+06	0.0141241	481503	449685	2.20307e+06	31818.1	2.65276e+06	0.00415914	0.0203762	0.000294285	0.0245354	0.073961	0.0984964
PLW	H	17812	17594.7													0
PNG	LM	9178714	3966.95	1.6522e+07	249381	0.0271695	1330.45	50.6156	148038	1279.83	148089	5.51446e-06	0.0161284	0.000139435	0.016134	0.0823624	0.0984964
POL	H	37974826	29958.1	4.98094e+08	5.37147e+06	0.141448	5.37147e+06	3.24586e+06	3.40492e+06	2.12561e+06	6.65078e+06	0.085474	0.0896625	0.0559741	0.175137	0	0.175137
PRE		920568701														0
PRI	H	3410837														0
PRK	L	25817709	790	1.75941e+07	1.49141e+06	0.0577671	1.49141e+06	1.4064e+06	40765.3	85016.6	1.44716e+06	0.0544741	0.00157897	0.00329296	0.0560531	0.0424433	0.0984964
PRT	H	10300300	33044.7	2.16065e+08	3.26887e+06	0.317357	3.26887e+06	2.03882e+06	3.40568e+06	1.23005e+06	5.4445e+06	0.197938	0.330639	0.119419	0.528577	-0.306165	0.222412
PRY	UM	6338660	13604.2	3.71772e+07	1.66483e+07	2.62647	1.32465e+07	8.79627e+06	760749	4.45021e+06	9.55702e+06	1.38772	0.120017	0.702074	1.50773	0	1.50773
PSE	LM	4454805		2.20194e+07												0
PSS		2509999														0
PST		1107161559														0
PYF	H	280087		5.6083e+06			25764.3	18594.9	62053.6	7169.43	80648.5	0.0663896	0.221551	0.0255971	0.287941	0	0.287941
QAT	H	2545820	92177.6	1.48751e+08	186.884	7.34083e-05										0
REU																0
ROU	UM	19588715	26948.2	2.14275e+08	4.32836e+06	0.220962	3.64978e+06	3.16157e+06	1.9403e+06	488213	5.10187e+06	0.161397	0.099052	0.0249232	0.260449	-0.0380371	0.222412
RUS	UM	145293260	25926.4	1.38294e+09	4.90872e+07	0.337849	3.18186e+06	2.81981e+06	1.36861e+07	362050	1.65059e+07	0.0194077	0.0941966	0.00249186	0.113604	0	0.113604
RWA	L	12202060	1934.97	1.02272e+07	1.27496e+06	0.104487	1.27496e+06	979624	236822	295337	1.21645e+06	0.0802835	0.0194084	0.0242039	0.0996918	0	0.0996918
SAS		1572520427														0
SAU	H	30977355	45795.5	6.40323e+08	3.26128e+06	0.105279	1.67338e+06	1.56941e+06	4.92257e+06	103966	6.49198e+06	0.0506632	0.158909	0.00335618	0.209572	0	0.209572
SDN	LM	42714306	4613.95	1.20908e+08	4.76497e+07	1.11554	4.76497e+07	4.72972e+07	654833	352481	4.7952e+07	1.10729	0.0153305	0.00825206	1.12262	0	1.12262
SEN	L	15475002	3259.19	2.27453e+07	5.25103e+06	0.339324	5.25103e+06	2.73359e+06	148627	2.51745e+06	2.88222e+06	0.176645	0.00960436	0.162678	0.18625	0	0.18625
SGP	H	5612253	95310.3	2.5524e+08	0	0										0
SLB	LM	685672	2625.09		5006.8	0.00730204										0
SLE	L	7379299	1593.48	4.61601e+06	2.07826e+06	0.281634	830380	694364	77261.8	136015	771626	0.0940963	0.0104701	0.018432	0.104566	0	0.104566
SLV	LM	6213533	8617.92	2.72853e+07	649174	0.104477	636017	235583	598835	400435	834418	0.0379144	0.096376	0.0644455	0.13429	0	0.13429
SMR	H	33825	58201.5	2.20399e+06												0
SOM	L	14916629	1059.14	1.17565e+06	1.67615e+07	1.12368	1.67615e+07	1.66801e+07	2193.25	81408.8	1.66823e+07	1.11822	0.000147034	0.00545758	1.11837	0	1.11837
SRB	UM	7020858	16614	6.18875e+07	639112	0.0910304	639112	586310	1.90108e+06	52801.4	2.48739e+06	0.0835098	0.270776	0.00752065	0.354286	0	0.354286
SSA		971179323														0
SSD	L	10259154	1590	8.33099e+06	1.25167e+07	1.22006										0
SSF		1080941647														0
SST		18865506														0
STP	LM	206970	3934.89	455340			6539.73	5381.69	13825.9	1158.04	19207.6	0.0260023	0.0668013	0.00559522	0.0928035	0.00569283	0.0984964
SUR	UM	593713	17753.1	3.06744e+06	53174.8	0.0895631	53174.8	16024.9	43034.9	37149.8	59059.8	0.026991	0.0724844	0.062572	0.0994754	0	0.0994754
SVK	H	5439232	30061.6	9.42856e+07	543159	0.0998596	533172	307588	956903	225584	1.26449e+06	0.05655	0.175926	0.0414735	0.232476	-0.0100639	0.222412
SVN	H	2066388	36507.6	4.40867e+07	535847	0.259316	535847	388560	382427	147288	770987	0.188038	0.18507	0.0712778	0.373108	-0.150696	0.222412
SWE	H	10057698	51948	5.11806e+08	2.45814e+06	0.244404	2.45814e+06	1.5027e+06	2.79826e+06	955445	4.30096e+06	0.149408	0.27822	0.0949964	0.427628	-0.205216	0.222412
SWZ	LM	1158195	8213.92	3.36396e+06	625237	0.539838	388114	149880	30655.1	238234	180535	0.129408	0.026468	0.205694	0.155876	0	0.155876
SXM	H	38996														0
SYC	H	95843	28116.7	1.37239e+06			0	0	26187	0	26187	0	0.273228	0	0.273228	-0.0508156	0.222412
SYR	L	19224668	4189	1.37032e+07	2.01888e+06	0.105015	2.01888e+06	1.33512e+06	52376	683762	1.38749e+06	0.069448	0.00272442	0.0355669	0.0721724	0.0263239	0.0984964
TCA	H	39913														0
TCD	L	15622759	1579.76	1.01473e+07	4.51193e+07	2.88805	4.51193e+07	2.42665e+07	131845	2.08528e+07	2.43983e+07	1.55328	0.00843926	1.33477	1.56172	0	1.56172
TEA		2061449949														0
TEC		458235497														0
TGO	L	8057140	1972.7	4.8761e+06	785369	0.0974749	736305	279881	221490	456424	501371	0.034737	0.0274899	0.0566483	0.062227	0.0362694	0.0984964
THA	UM	71160187	17008	3.78247e+08	703845	0.009891	64405.2	40294.8	2.8546e+06	24110.4	2.89489e+06	0.000566255	0.0401151	0.000338819	0.0406813	0.0578151	0.0984964
TJK	L	9085946	3236.44	7.60869e+06	1.74041e+06	0.19155	1.74041e+06	737835	81665.5	1.00258e+06	819501	0.0812062	0.00898811	0.110344	0.0901943	0.00830206	0.0984964
TKM	UM	6507061	13703.5	3.47107e+07	9.90188e+06	1.52171	3.17746e+06	1.31685e+06	363571	1.86062e+06	1.68042e+06	0.202372	0.0558733	0.285938	0.258245	0	0.258245
TLA		614776664														0
TLS	LM	1251703	3138.44		69476.9	0.0555059										0
TMN		652312809														0
TON	UM	105356	6256.98													0
TSA		1572520427														0
TSS		1080941647														0
TTO	H	1356633	26213.9	2.10636e+07	365947	0.269747	365947	281143	221818	84804.3	502961	0.207236	0.163506	0.0625109	0.370742	-0.14833	0.222412
TUN	LM	11650498	10874.9	4.30234e+07	1.77824e+06	0.152632	1.77824e+06	810959	432370	967284	1.24333e+06	0.0696072	0.0371117	0.0830251	0.106719	0	0.106719
TUR	UM	80312698	27582.8	8.42286e+08	8.8761e+06	0.110519	5.3204e+06	3.59755e+06	4.27815e+06	1.72285e+06	7.87571e+06	0.0447943	0.0532687	0.0214518	0.098063	0	0.098063
TUV	UM	10869	4208.92													0
TWN	H		44559	1.70309e+08			0	0	1.72141e+06	0	1.72141e+06					0
TZA	L	55652890	2458.34	5.43991e+07	2.41417e+07	0.433791	2.41417e+07	1.62397e+07	157967	7.90202e+06	1.63977e+07	0.291803	0.00283843	0.141988	0.294642	0	0.294642
UGA	L	40177388	2128.4	2.80125e+07	1.39851e+07	0.348085	1.39851e+07	6.46892e+06	177584	7.51622e+06	6.64651e+06	0.161009	0.00442001	0.187076	0.165429	0	0.165429
UKR	LM	45436041	11860.6	1.16268e+08			3.3499e+06	3.05238e+06	1.3193e+06	297521	4.37168e+06	0.0671798	0.0290364	0.00654812	0.0962161	0.00228024	0.0984964
UMC		2731375253														0
URY	H	3388438	23107	5.78363e+07	1.68429e+07	4.97068	1.44644e+07	8.61739e+06	474945	5.84701e+06	9.09234e+06	2.54318	0.140166	1.72558	2.68334	0	2.68334
USA	H	326608609	59914.8	2.0211e+10	1.62743e+08	0.498281	1.62743e+08	1.14236e+08	6.26048e+07	4.85066e+07	1.76841e+08	0.349764	0.191681	0.148516	0.541446	-0.319034	0.222412
USR				49640.9												0
UZB	LM	31819178	6840.71	5.28343e+07	8.51021e+06	0.267455	8.51021e+06	7.05127e+06	586634	1.45894e+06	7.63791e+06	0.221605	0.0184365	0.0458509	0.240041	0	0.240041
VCT	UM	105663	13633													0
VEN	UM	30565323	11078	3.61697e+08	2.14368e+07	0.701345	2.14368e+07	2.13723e+07	6.10813e+06	64518.6	2.74804e+07	0.699234	0.199839	0.00211084	0.899072	0	0.899072
VGB	H	32699		759120												0
VIR	H	107281														0
VNM	LM	95176977	9050.69	2.6514e+08	875239	0.00919591	329074	194066	1.19886e+06	135008	1.39292e+06	0.002039	0.0125961	0.0014185	0.0146351	0.0838613	0.0984964
VUT	LM	278507	3031.19	667304			210514	101406	25356.6	109108	126762	0.364105	0.0910447	0.391761	0.455149	0	0.455149
WLD		7614748582														0
WSM	UM	205415	6238.8	896124			124496	92308	29132.6	32187.6	121441	0.449373	0.141823	0.156695	0.591196	0	0.591196
XKX	LM	1791019														0
YEM	L	33090921	2456	2.94875e+07	5.20992e+06	0.157442	5.20992e+06	4.90572e+06	158788	304196	5.06451e+06	0.14825	0.00479853	0.00919272	0.153048	0	0.153048
ZAF	UM	57635162	13950.5	3.40026e+08	3.07904e+07	0.534229	6.58107e+06	5.41923e+06	3.05027e+06	1.16184e+06	8.4695e+06	0.0940265	0.0529237	0.0201585	0.14695	0	0.14695
ZMB	LM	17441320	3395.48	2.51575e+07	1.29755e+07	0.743949	2.14516e+06	590051	381739	1.55511e+06	971791	0.0338307	0.0218871	0.0891625	0.0557177	0.0427786	0.0984964
ZWE	L	14812482	2331.78	2.40836e+07	4.95702e+06	0.334652	4.95702e+06	4.71959e+06	211713	237435	4.9313e+06	0.318622	0.0142929	0.0160294	0.332915	0	0.332915

## Sheet: A1-Forest
ISO3	Income group	Population	GDP per capita (PPP, 2017 int $)	Final demand (thousand USD)	Biocapacity (gha)	Biocapacity (gha/cap)	Production footprint (gha)	Domestic use (gha)	Imports (gha)	Exports (gha)	Consumption footprint (gha)	Domestic use (gha/cap)	Imports (gha/cap)	Exports (gha/cap)	Consumption footprint (gha/cap)	Change needed (gha/cap)	Total mod (gha/cap)
ABW	H	108735		2.49667e+06			847.083	345.338	51538.8	501.746	51884.2	0.00317596	0.473986	0.00461439	0.477162	0	0.477162
AFE		640058741														0
AFG	L	35688935	2096.09	2.8317e+07	537757	0.0150679	1.93276e+06	1.91009e+06	328869	22672.2	2.23896e+06	0.0535205	0.00921488	0.000635273	0.0627353	0.0710072	0.133743
AFW		440882906														0
AGO	LM	30234839	7216.06	1.10371e+08	1.45942e+07	0.482695	2.64668e+06	2.20156e+06	1.08256e+06	445121	3.28412e+06	0.0728154	0.0358051	0.0147221	0.108621	0.025122	0.133743
ALB	UM	2873457	12773.3	1.41766e+07	636337	0.221453	492097	314577	210645	177520	525221	0.109477	0.073307	0.0617792	0.182784	0	0.182784
AND	H	73763		2.82629e+06			0	0	30691.3	0	30691.3	0	0.41608	0	0.41608	0	0.41608
ANT				-171000												0
ARB		428315886														0
ARE	H	9223225	71182.4	2.67948e+08	619967	0.067218	7134.01	1880.25	5.17103e+06	5253.76	5.17291e+06	0.00020386	0.560653	0.000569623	0.560857	0	0.560857
ARG	H	44288894	23597.1	6.37765e+08	2.69486e+07	0.608473	1.11855e+07	9.38568e+06	3.98277e+06	1.79986e+06	1.33685e+07	0.211919	0.0899271	0.0406391	0.301847	0	0.301847
ARM	UM	2979400	12509.6	1.27971e+07	286343	0.0961075	587937	357970	214913	229968	572882	0.120148	0.0721329	0.0771859	0.192281	0	0.192281
ASM	UM	51586														0
ATG	H	90468	20777.9	1.30073e+06												0
AUS	H	24592588	48400.2	1.38225e+09	4.84457e+07	1.96993	2.47013e+07	1.66568e+07	5.0896e+06	8.04451e+06	2.17464e+07	0.677308	0.206957	0.327111	0.884265	-0.326305	0.557959
AUT	H	8797566	54173	3.93906e+08	1.76e+07	2.00055	1.07535e+07	5.26103e+06	4.95714e+06	5.49248e+06	1.02182e+07	0.59801	0.563468	0.624318	1.16148	-0.603518	0.557959
AZE	UM	9854033	14121.4	3.5467e+07	1.05595e+06	0.107159	162388	122333	781272	40055.3	903605	0.0124145	0.0792845	0.00406486	0.091699	0.0420435	0.133743
BDI	L	11506762	750.788	2.51131e+06	91580.2	0.00795882	2.71196e+06	2.49142e+06	72369.7	220536	2.56379e+06	0.216518	0.00628932	0.0191657	0.222807	0	0.222807
BEL	H	11375158	50442.3	4.88195e+08	3.30268e+06	0.290341	3.4932e+06	1.44222e+06	6.20426e+06	2.05098e+06	7.64648e+06	0.126787	0.545422	0.180303	0.672209	-0.11425	0.557959
BEN	L	12039780	2933.84	9.71682e+06	2.25496e+06	0.187293	2.75987e+06	1.85694e+06	173989	902923	2.03093e+06	0.154234	0.0144512	0.074995	0.168685	0	0.168685
BFA	L	19894407	1978.15	1.49578e+07	4.48129e+06	0.225254	6.13956e+06	4.99389e+06	323537	1.14567e+06	5.31743e+06	0.25102	0.0162627	0.0575873	0.267283	0	0.267283
BGD	LM	162186147	4830.78	2.48355e+08	814433	0.0050216	1.01449e+07	8.15439e+06	1.80524e+06	1.99053e+06	9.95963e+06	0.050278	0.0111307	0.0122731	0.0614087	0.0723339	0.133743
BGR	UM	6803468	21473.8	5.16843e+07	7.53763e+06	1.10791	3.51834e+06	1.00391e+06	865573	2.51444e+06	1.86948e+06	0.147558	0.127225	0.369581	0.274784	0	0.274784
BHR	H	1501116	48929.4	3.07201e+07	1375.65	0.00091642	2723.72	606.649	475815	2117.07	476422	0.000404132	0.316974	0.00141033	0.317378	0	0.317378
BHS	H	390485	34357.3	1.20081e+07			24680	14426.3	124867	10253.7	139293	0.0369445	0.319775	0.0262589	0.356719	0	0.356719
BIH	UM	3428682	13402.4	1.91187e+07	3.36305e+06	0.980858	2.57875e+06	766034	385657	1.81272e+06	1.15169e+06	0.223419	0.11248	0.528693	0.335899	0	0.335899
BLR	UM	9458989	18356.1	3.25848e+07	1.55739e+07	1.64647	1.35295e+07	69058.3	2.52729e+06	1.34605e+07	2.59635e+06	0.00730081	0.267184	1.42304	0.274485	0	0.274485
BLZ	UM	373202	8873.75	1.73615e+06	713090	1.91073	76415.8	21408.7	39748.4	55007.1	61157.1	0.0573648	0.106506	0.147392	0.163871	0	0.163871
BMU	H	63578		5.38289e+06												0
BOL	LM	11344587	8244.93	3.95471e+07	1.26738e+08	11.1717	1.60106e+06	1.26963e+06	629635	331428	1.89927e+06	0.111915	0.055501	0.0292147	0.167416	0	0.167416
BRA	UM	204703445	14477.9	1.98362e+09	1.31504e+09	6.4241	1.51109e+08	1.19946e+08	6.56574e+06	3.11627e+07	1.26512e+08	0.585952	0.0320744	0.152234	0.618026	0	0.618026
BRB	H	280171	16199	4.5437e+06	5360.27	0.0191321	6000.14	2933.15	69123.1	3066.99	72056.3	0.0104691	0.246718	0.0109469	0.257187	0	0.257187
BRN	H	432772	60173.1	9.85035e+06	622328	1.43801	50169	39486	104874	10682.9	144360	0.0912398	0.242331	0.0246849	0.33357	0	0.33357
BTN	LM	754335	10986.9	2.76484e+06	3.13979e+06	4.16233	2.05811e+06	871103	71623.9	1.18701e+06	942727	1.1548	0.0949497	1.57358	1.24975	0	1.24975
BWA	UM	2266747	14656.8	1.5899e+07	1.56506e+06	0.690444	338568	208421	226730	130147	435150	0.091947	0.100024	0.0574158	0.191971	0	0.191971
CAF	L	4793511	839.6	2.02598e+06	2.80861e+07	5.85918	1.3483e+06	1.08271e+06	40444.7	265598	1.12315e+06	0.225869	0.00843739	0.0554079	0.234307	0	0.234307
CAN	H	36545075	48317.2	1.6111e+09	3.07648e+08	8.41833	1.089e+08	5.39537e+07	1.24627e+07	5.49459e+07	6.64164e+07	1.47636	0.341023	1.50351	1.81738	-1.25942	0.557959
CEB		102337501														0
CHE	H	8451840	69103.6	5.97725e+08	5.68746e+06	0.672925	2.60571e+06	1.48115e+06	6.32109e+06	1.12456e+06	7.80224e+06	0.175245	0.747895	0.133055	0.923141	-0.365182	0.557959
CHI	H	164319														0
CHL	H	18558868	24546.9	2.68583e+08	3.97735e+07	2.1431	3.82147e+07	1.6933e+07	1.76208e+06	2.12817e+07	1.86951e+07	0.912394	0.0949455	1.14671	1.00734	0	1.00734
CHN	UM	1396215000	14243.5	1.14168e+10	3.27858e+08	0.234819	1.75851e+08	1.53825e+08	6.56777e+07	2.2026e+07	2.19503e+08	0.110173	0.0470398	0.0157755	0.157213	0	0.157213
CIV	LM	26733372	4750.94	3.35565e+07	2.56342e+06	0.0958885	5.16968e+06	1.42165e+06	332822	3.74803e+06	1.75447e+06	0.0531789	0.0124497	0.140201	0.0656286	0.068114	0.133743
CMR	LM	24128601	3691.09	3.22636e+07	2.03494e+07	0.843373	6.65697e+06	2.81939e+06	256237	3.83757e+06	3.07563e+06	0.116849	0.0106197	0.159047	0.127468	0.00627428	0.133743
COD	L	87083398	1023.54	3.57235e+07	1.28903e+08	1.48023	3.53001e+07	2.57348e+07	1.23148e+06	9.56536e+06	2.69662e+07	0.295518	0.0141414	0.109841	0.30966	0	0.30966
COG	LM	5351011	4073.93	9.44885e+06	2.92881e+07	5.47338	2.14853e+06	1.45978e+06	216087	688748	1.67587e+06	0.272805	0.0403824	0.128714	0.313188	0	0.313188
COL	UM	48131078	14334.9	3.25999e+08	9.86134e+07	2.04885	4.58281e+06	3.50563e+06	3.28699e+06	1.07718e+06	6.79262e+06	0.0728351	0.0682924	0.02238	0.141127	0	0.141127
COM	L	756669	3240.18													0
CPV	LM	512893	6320.34	1.50369e+06			70558.7	46908.9	52214.8	23649.8	99123.7	0.0914593	0.101804	0.0461106	0.193264	0	0.193264
CRI	UM	4913177	20168.2	5.43295e+07	3.31008e+06	0.673714	2.1703e+06	1.10603e+06	905189	1.06427e+06	2.01122e+06	0.225115	0.184237	0.216615	0.409352	0	0.409352
CSS		4366140														0
CUB	UM	11247829	21016	8.88958e+07	2.68954e+06	0.239116	859313	740244	433834	119070	1.17408e+06	0.0658121	0.0385705	0.010586	0.104383	0.0293599	0.133743
CUW	H	160175														0
CYM	H	64535		4.9647e+06												0
CYP	H	1254275	38422	2.18236e+07			6499.83	5365.43	364407	1134.4	369772	0.00427772	0.290532	0.000904428	0.29481	0	0.29481
CZE	H	10594438	38824.9	1.42139e+08	1.32221e+07	1.24803	1.2775e+07	5.46051e+06	3.29062e+06	7.31449e+06	8.75114e+06	0.515413	0.310599	0.690408	0.826012	-0.268053	0.557959
DEU	H	82657002	53071.5	3.24085e+09	5.85721e+07	0.708616	3.91847e+07	2.23438e+07	3.43041e+07	1.68409e+07	5.66479e+07	0.27032	0.415017	0.203744	0.685337	-0.127377	0.557959
DJI	LM	1054841	4451.68	2.35001e+06	1743.39	0.00165275	149705	37332.3	90501.3	112373	127834	0.0353914	0.0857961	0.10653	0.121188	0.012555	0.133743
DMA	UM	68496	11511.6													0
DNK	H	5764980	55356.7	2.93781e+08	2.31067e+06	0.400811	2.02501e+06	715747	5.14116e+06	1.30926e+06	5.8569e+06	0.124154	0.891791	0.227106	1.01595	-0.457986	0.557959
DOM	UM	10666843	16524.5	7.33187e+07	1.74623e+06	0.163707	403370	278683	736948	124687	1.01563e+06	0.0261261	0.0690877	0.0116892	0.0952139	0.0385287	0.133743
DZA	UM	41689299	11809.5	1.78171e+08	1.08245e+06	0.0259647	3.37233e+06	3.1959e+06	1.45149e+06	176433	4.64739e+06	0.0766599	0.0348168	0.00423209	0.111477	0.0222658	0.133743
EAP		2087238522														0
EAR		3274060446														0
EAS		2333475520														0
ECA		244533821														0
ECS		915290996														0
ECU	UM	16759519	11679.4	1.0164e+08	2.0652e+07	1.23226	3.60985e+06	2.82146e+06	944290	788394	3.76575e+06	0.16835	0.0563435	0.0470415	0.224693	0	0.224693
EGY	LM	103696057	10435.9	2.15257e+08	0	0	6.93928e+06	5.95489e+06	1.79221e+06	984388	7.7471e+06	0.0574264	0.0172833	0.00949301	0.0747097	0.0590328	0.133743
EMU		344810179														0
ERI	L	3150347	1585	5.6753e+06	356775	0.113249	395252	360229	48029.2	35023.8	408258	0.114346	0.0152457	0.0111174	0.129591	0.00415114	0.133743
ESP	H	46571232	39528.9	1.24572e+09	1.93993e+07	0.416552	1.10809e+07	6.40706e+06	1.14369e+07	4.67387e+06	1.7844e+07	0.137576	0.245579	0.10036	0.383154	0	0.383154
EST	H	1317384	33821.9	2.55667e+07	5.07806e+06	3.85465	6.57807e+06	2.00405e+06	868375	4.57402e+06	2.87243e+06	1.52124	0.659166	3.47205	2.1804	-1.62244	0.557959
ETH	L	109666481	1987.97	2.01657e+07	5.67766e+06	0.0517721	4.40129e+07	3.9069e+07	718324	4.94392e+06	3.97873e+07	0.356253	0.00655008	0.0450814	0.362803	0	0.362803
EUU		445321060														0
FCS		931222867														0
FIN	H	5508214	47570.1	2.48015e+08	4.65758e+07	8.45571	4.1636e+07	1.71377e+07	2.99774e+06	2.44983e+07	2.01354e+07	3.1113	0.544231	4.44759	3.65553	-3.09757	0.557959
FJI	UM	918759	12822	4.45456e+06	1.21301e+06	1.32028	572436	159818	87032.7	412618	246851	0.17395	0.0947285	0.449103	0.268678	0	0.268678
FRA	H	66918020	44577.1	2.55492e+09	6.36863e+07	0.951707	2.7146e+07	1.66956e+07	2.04883e+07	1.04503e+07	3.7184e+07	0.249494	0.306171	0.156166	0.555665	0	0.555665
FRO	H	50180														0
FSM	LM	109481	3522.29													0
GAB	UM	2156900	14478.1	1.00586e+07	3.1493e+07	14.601	2.0113e+06	1.31081e+06	132529	700494	1.44334e+06	0.607728	0.0614442	0.324769	0.669172	0	0.669172
GBR	H	65966000	46372.4	2.69118e+09	1.0289e+07	0.155975	6.9549e+06	4.63614e+06	2.12525e+07	2.31876e+06	2.58886e+07	0.0702807	0.322174	0.0351509	0.392454	0	0.392454
GEO	LM	3728004	13589.7	1.83482e+07	2.71819e+06	0.729127	273166	148427	537455	124739	685882	0.039814	0.144167	0.03346	0.183981	0	0.183981
GHA	LM	30008354	4929.57	5.61052e+07	5.95264e+06	0.198366	1.92737e+07	3.18855e+06	593871	1.60852e+07	3.78242e+06	0.106255	0.0197902	0.536024	0.126046	0.00769698	0.133743
GIB	H	34245														0
GIN	L	12385659	2383.58	9.34428e+06	6.82323e+06	0.550898	5.12134e+06	2.8685e+06	192937	2.25284e+06	3.06144e+06	0.231599	0.0155775	0.181891	0.247176	0	0.247176
GLP																0
GMB	L	2342189	1927.04	1.70739e+06	171406	0.073182	481086	423427	38642.1	57658.9	462069	0.180783	0.0164983	0.0246175	0.197281	0	0.197281
GNB	L	1877072	1872.31		535295	0.285175										0
GNQ	UM	1562396	19617.8		2.96166e+06	1.89559										0
GRC	H	10754679	28604.9	2.06818e+08	2.39276e+06	0.222485	802816	484046	1.87501e+06	318771	2.35905e+06	0.0450079	0.174343	0.0296402	0.219351	0	0.219351
GRD	UM	115438	14870													0
GRL	H	56172		2.23416e+06												0
GTM	UM	16567357	8322.22	7.77879e+07	5.02233e+06	0.303146	8.25573e+06	5.79831e+06	1.09093e+06	2.45742e+06	6.88923e+06	0.349984	0.0658479	0.148329	0.415832	0	0.415832
GUF																0
GUM	H	163490														0
GUY	UM	768479	12193.6	2.95926e+07	5.01193e+07	65.2189	524027	523009	24058.8	1017.43	547068	0.680577	0.031307	0.00132395	0.711884	0	0.711884
HIC		1380319892														0
HKG	H	7393200		3.83997e+08			0	0	6.27587e+06	0	6.27587e+06	0	0.848871	0	0.848871	0	0.848871
HND	LM	9588137	5447.7	2.56293e+07	7.55157e+06	0.787595	3.87265e+06	1.49524e+06	690200	2.37741e+06	2.18544e+06	0.155947	0.0719848	0.247953	0.227932	0	0.227932
HPC		779389964														0
HRV	H	4041407	27211.8	5.18563e+07	4.68865e+06	1.16015	2.99014e+06	674214	768781	2.31593e+06	1.443e+06	0.166827	0.190226	0.573049	0.357053	0	0.357053
HTI	L	10817754	3187.79	1.03483e+07	293733	0.0271528	966851	780628	148695	186223	929323	0.0721618	0.0137455	0.0172146	0.0859072	0.0478353	0.133743
HUN	H	9726756	29501.1	1.28785e+08	6.53654e+06	0.672016	3.07037e+06	1.08905e+06	2.12897e+06	1.98132e+06	3.21802e+06	0.111964	0.218877	0.203698	0.330842	0	0.330842
IBD		4765998583														0
IBT		6440236993														0
IDA		1674238410														0
IDB		590024074														0
IDN	LM	267346658	10941.9	9.66417e+08	7.19805e+07	0.26924	6.84518e+07	4.6297e+07	3.63038e+06	2.21548e+07	4.99274e+07	0.173172	0.0135793	0.0828691	0.186752	0	0.186752
IDX		1084214336														0
IMN	H	83609														0
IND	LM	1359657400	6112.07	2.52209e+09	2.74577e+07	0.0201945	1.49539e+08	1.20253e+08	1.32101e+07	2.92863e+07	1.33463e+08	0.0884434	0.00971574	0.0215395	0.0981591	0.0355834	0.133743
INX																0
IRL	H	4827445	77749.2	2.58428e+08	2.34854e+06	0.486497	2.51504e+06	603806	2.90541e+06	1.91124e+06	3.50921e+06	0.125078	0.601852	0.395911	0.72693	-0.168971	0.557959
IRN	UM	85026754	15163.3	4.26327e+08	4.51728e+06	0.0531277	301748	245928	2.78639e+06	55820.4	3.03232e+06	0.00289236	0.0327708	0.000656504	0.0356631	0.0980794	0.133743
IRQ	UM	39337353	9976.85	1.62521e+08	1.43728e+06	0.0365374	85945	82269.6	1.35809e+06	3675.4	1.44036e+06	0.00209139	0.0345243	9.34329e-05	0.0366157	0.0971269	0.133743
ISL	H	343400	55638.5	2.10664e+07			2473.35	942.047	265346	1531.3	266288	0.00274329	0.772701	0.00445923	0.775444	-0.217485	0.557959
ISR	H	8713300	39121.3	3.42809e+08	212772	0.0244192	18208.7	13565.3	3.4342e+06	4643.42	3.44777e+06	0.00155685	0.394133	0.000532911	0.39569	0	0.39569
ITA	H	60002252	41581.1	1.85219e+09	2.04137e+07	0.340216	5.65628e+06	3.73928e+06	1.67262e+07	1.917e+06	2.04655e+07	0.062319	0.27876	0.0319489	0.341079	0	0.341079
JAM	UM	2815764	9984.58	1.65937e+07	516054	0.183273	302221	192779	231382	109442	424161	0.0684641	0.0821739	0.0388675	0.150638	0	0.150638
JOR	UM	10234226	9629.1	4.81345e+07	169581	0.01657	138183	81390.1	612549	56793	693939	0.00795273	0.059853	0.00554932	0.0678057	0	0.0678057
JPN	H	126972000	41444.2	4.5499e+09	4.35021e+07	0.342611	1.80963e+07	1.52359e+07	3.94439e+07	2.86045e+06	5.46797e+07	0.119994	0.31065	0.0225282	0.430644	0	0.430644
KAZ	UM	18651931	24863	1.41691e+08	3.90973e+06	0.209615	160525	126287	4.42051e+06	34237.8	4.5468e+06	0.00677072	0.237	0.00183562	0.243771	0	0.243771
KEN	LM	49197766	4312.91	8.42449e+07	617338	0.0125481	1.07351e+07	8.50653e+06	1.04209e+06	2.22858e+06	9.54862e+06	0.172905	0.0211817	0.0452985	0.194086	0	0.194086
KGZ	LM	6306696	5046.69	9.88063e+06	662130	0.104988	20389.5	16588.2	286795	3801.27	303384	0.00263025	0.0454748	0.000602736	0.048105	0.0856375	0.133743
KHM	LM	16073372	3972.72	2.22009e+07	3.40142e+06	0.211618	3.06998e+06	1.00726e+06	328995	2.06272e+06	1.33625e+06	0.0626661	0.0204683	0.128331	0.0831344	0.0506081	0.133743
KIR	LM	120275	1962.32													0
KNA	H	47050	29333.4													0
KOR	H	51361911	40957.4	1.49666e+09	4.4704e+06	0.0870372	3.28844e+06	2.26067e+06	1.07729e+07	1.02777e+06	1.30336e+07	0.0440145	0.209745	0.0200104	0.25376	0	0.25376
KWT	H	4154812	50007.3	1.01741e+08	10905.8	0.00262487	7674.96	5876.48	2.19467e+06	1798.48	2.20055e+06	0.00141438	0.528224	0.000432868	0.529638	0	0.529638
LAC		561957179														0
LAO	LM	7018147	7211.26	1.70701e+07	4.56468e+06	0.650411	3.20309e+06	335723	206517	2.86737e+06	542240	0.0478364	0.0294261	0.408565	0.0772625	0.05648	0.133743
LBN	UM	6160128	17808.1	6.19899e+07	311754	0.0506084	12062.1	4920.35	876707	7141.76	881627	0.000798742	0.14232	0.00115935	0.143118	0	0.143118
LBR	L	4848925	1533.41	1.47362e+06	1.04566e+07	2.15649	3.69098e+06	3.30975e+06	79039.7	381231	3.38879e+06	0.682574	0.0163005	0.0786218	0.698874	0	0.698874
LBY	UM	6738770	24212.9	2.50125e+07			472248	410325	250312	61923.4	660637	0.0608902	0.037145	0.00918913	0.0980352	0.0357073	0.133743
LCA	UM	176342	15247.5		17678.6	0.100252										0
LCN		630414986														0
LDC		1008993468														0
LIC		514890519														0
LIE	H	37962		5.11781e+06			4801.6	2049.59	121594	2752.01	123644	0.0539906	3.20305	0.0724938	3.25704	0	3.25704
LKA	LM	21453000	13584.2	8.93941e+07			2.28088e+06	1.349e+06	1.48145e+06	931877	2.83045e+06	0.0628817	0.0690556	0.0434381	0.131937	0.00180524	0.133743
LMC		2847931114														0
LMY		6094196886														0
LSO	LM	2157110	2571.69	3.18285e+06	0	0	817669	607748	96599.4	209921	704347	0.281742	0.0447818	0.0973161	0.326524	0	0.326524
LTE		2286095306														0
LTU	H	2842639	33761.9	4.70335e+07	6.08222e+06	2.13964	4.10082e+06	1.43116e+06	1.59569e+06	2.66967e+06	3.02685e+06	0.503461	0.561341	0.93915	1.0648	-0.506843	0.557959
LUX	H	596336	114986	6.21585e+07	422813	0.709018	234445	33678.3	941303	200767	974981	0.0564754	1.57848	0.336667	1.63495	-1.07699	0.557959
LVA	H	1942248	28673.6	3.012e+07	8.38154e+06	4.31538	8.30047e+06	2.37986e+06	1.01395e+06	5.92062e+06	3.3938e+06	1.22531	0.522047	3.04833	1.74736	-1.1894	0.557959
MAC	H	648400		4.92409e+07			0	0	238739	0	238739	0	0.368197	0	0.368197	0	0.368197
MAF	H	36837														0
MAR	LM	35446392	7921.62	1.12337e+08	3.18025e+06	0.0897201	2.73075e+06	1.67795e+06	1.40324e+06	1.05281e+06	3.08118e+06	0.0473376	0.0395876	0.0297014	0.0869252	0.0468174	0.133743
MCO	H	37678		6.42849e+06												0
MDA	LM	2755189	11651.2	163771	687491	0.249526	495157	60190.6	18617.8	434966	78808.4	0.0218463	0.00675737	0.157872	0.0286036	0.105139	0.133743
MDG	L	26788375	1548.16	1.18818e+07	1.68277e+07	0.628171	5.59089e+06	3.96932e+06	164008	1.62158e+06	4.13332e+06	0.148173	0.00612234	0.0605328	0.154295	0	0.154295
MDV	UM	458287	18973.6	4.76728e+06			6207.27	3893.83	140047	2313.43	143941	0.00849649	0.305588	0.005048	0.314085	0	0.314085
MEA		718887744														0
MEX	UM	123400057	20032.4	1.13688e+09	5.5611e+07	0.450656	2.02291e+07	1.35892e+07	1.36057e+07	6.63992e+06	2.71949e+07	0.110123	0.110257	0.0538081	0.22038	0	0.22038
MHL	UM	46529	4634.94													0
MIC		5579306367														0
MKD	UM	1898657	15709.3	1.16402e+07	1.44082e+06	0.758863	0	0	350327	0	350327	0	0.184513	0	0.184513	0	0.184513
MLI	L	19813011	2153.85	1.69363e+07	9.36996e+06	0.472919	2.74435e+06	2.44107e+06	370939	303275	2.81201e+06	0.123205	0.018722	0.0153068	0.141927	0	0.141927
MLT	H	467106	43516.6	1.03043e+07	513.479	0.00109928	0	0	216664	0	216664	0	0.463842	0	0.463842	0	0.463842
MMR	LM	51894938	4312.95	6.73813e+07	2.75833e+07	0.531523	1.7567e+07	1.46512e+07	109694	2.91579e+06	1.47609e+07	0.282324	0.00211377	0.0561863	0.284438	0	0.284438
MNA		656767614														0
MNE	UM	625982	19685.8	6.1494e+06	1.20301e+06	1.92179	505870	350541	310848	155329	661389	0.559985	0.496577	0.248137	1.05656	0	1.05656
MNG	LM	3148917	11431.5	1.18786e+07	2.10122e+07	6.67284	340685	174995	285967	165689	460963	0.0555732	0.0908145	0.0526178	0.146388	0	0.146388
MNP	H	49959														0
MOZ	L	28166393	1287.23	1.53891e+07	1.43285e+07	0.50871	7.72904e+06	5.21864e+06	366053	2.5104e+06	5.58469e+06	0.185279	0.0129961	0.0891276	0.198275	0	0.198275
MRT	LM	4210600	5259.07	5.05199e+06	242299	0.0575451	829871	597599	201377	232272	798976	0.141927	0.0478263	0.0551636	0.189754	0	0.189754
MTQ																0
MUS	UM	1264887	22148.6	1.25632e+07			2900.34	1573.95	325210	1326.39	326784	0.00124434	0.257106	0.00104863	0.25835	0	0.25835
MWI	L	18039715	1454.78	6.47536e+06	249056	0.013806	3.21715e+06	2.86811e+06	237780	349034	3.10589e+06	0.158989	0.0131809	0.0193481	0.17217	0	0.17217
MYS	UM	32355644	25935.1	2.82054e+08	1.75239e+07	0.541604	1.0599e+07	5.42232e+06	4.30909e+06	5.17663e+06	9.73141e+06	0.167585	0.133179	0.159992	0.300764	0	0.300764
NAC		363217262														0
NAM	UM	2506853	10335.3	1.45917e+07	757805	0.302293	563607	356614	219022	206994	575635	0.142256	0.0873692	0.0825712	0.229625	0	0.229625
NCL	H	283546		9.83311e+06			15104.5	12227.4	136008	2877.06	148236	0.0431232	0.47967	0.0101467	0.522793	0	0.522793
NER	L	21435446	1155.97	1.25226e+07	800695	0.0373538	4.82619e+06	4.23879e+06	228934	587406	4.46772e+06	0.197747	0.0106802	0.0274035	0.208427	0	0.208427
NGA	LM	200254579	5120.01	3.61253e+08	7.13731e+06	0.0356412	3.19909e+07	3.0303e+07	1.43065e+06	1.68785e+06	3.17337e+07	0.151323	0.00714415	0.00842852	0.158467	0	0.158467
NIC	LM	6316231	5915.38	1.50232e+07	4.75703e+06	0.753144	2.43654e+06	1.18732e+06	481885	1.24922e+06	1.6692e+06	0.187979	0.0762932	0.19778	0.264272	0	0.264272
NLD	H	17131296	55088.6	7.34228e+08	1.84555e+06	0.10773	1.45622e+06	454454	9.33078e+06	1.00177e+06	9.78524e+06	0.0265277	0.544663	0.0584758	0.571191	-0.0132315	0.557959
NOR	H	5276968	64050.8	3.78071e+08	1.87965e+07	3.56198	7.97825e+06	5.07018e+06	4.61175e+06	2.90807e+06	9.68193e+06	0.960813	0.873939	0.551087	1.83475	-1.27679	0.557959
NPL	L	28011258	3495.53	3.23126e+07	2.61368e+06	0.0933083	5.45662e+06	4.82468e+06	286194	631936	5.11088e+06	0.172241	0.0102171	0.0225601	0.182458	0	0.182458
NRU	UM	11324	11746.6													0
NZL	H	4813600	42218.5	1.97337e+08	1.97545e+07	4.10388	2.40539e+07	1.23196e+07	1.46674e+06	1.17343e+07	1.37864e+07	2.55934	0.304708	2.43773	2.86404	-2.30608	0.557959
OED		1348127258														0
OMN	H	4537396	34218.4	6.32526e+07	4977.5	0.00109699	18086.9	12478	897606	5608.94	910084	0.00275003	0.197824	0.00123616	0.200574	0	0.200574
OSS		11989367														0
PAK	LM	223273967	4891.72	3.10839e+08	3.83388e+06	0.0171712	1.40373e+07	1.23123e+07	1.25071e+06	1.72501e+06	1.3563e+07	0.0551443	0.0056017	0.00772597	0.060746	0.0729966	0.133743
PAN	H	4098707	30526.4	5.89437e+07	5.85222e+06	1.42782	651536	225327	869661	426210	1.09499e+06	0.0549751	0.212179	0.103986	0.267154	0	0.267154
PER	UM	31324637	12442.7	1.98728e+08	7.93139e+07	2.532	3.47726e+06	2.49016e+06	2.27904e+06	987102	4.7692e+06	0.0794953	0.0727554	0.031512	0.152251	0	0.152251
PHL	LM	108119693	8001.76	3.50039e+08	8.1264e+06	0.0751611	7.0329e+06	5.33793e+06	2.59088e+06	1.69497e+06	7.92881e+06	0.0493706	0.0239631	0.0156768	0.0733336	0.0604089	0.133743
PLW	H	17812	17594.7													0
PNG	LM	9178714	3966.95	1.6522e+07	1.82284e+07	1.98594	4.94119e+06	2.20934e+06	191582	2.73185e+06	2.40092e+06	0.240703	0.0208724	0.297628	0.261575	0	0.261575
POL	H	37974826	29958.1	4.98094e+08	2.68647e+07	0.707434	2.99558e+07	1.44127e+07	6.75552e+06	1.55431e+07	2.11683e+07	0.379534	0.177895	0.409301	0.557429	0	0.557429
PRE		920568701														0
PRI	H	3410837														0
PRK	L	25817709	790	1.75941e+07	5.66158e+06	0.21929	3.39989e+06	3.30043e+06	62756.5	99458.4	3.36319e+06	0.127836	0.00243075	0.00385233	0.130267	0.00347585	0.133743
PRT	H	10300300	33044.7	2.16065e+08	8.52369e+06	0.827519	9.1344e+06	3.70184e+06	1.84086e+06	5.43257e+06	5.5427e+06	0.359391	0.178719	0.527418	0.538111	0	0.538111
PRY	UM	6338660	13604.2	3.71772e+07	3.90419e+07	6.15933	5.61289e+06	3.69668e+06	1.0616e+06	1.91621e+06	4.75829e+06	0.583196	0.16748	0.302305	0.750677	0	0.750677
PSE	LM	4454805		2.20194e+07												0
PSS		2509999														0
PST		1107161559														0
PYF	H	280087		5.6083e+06			2451.72	1469.83	77520.4	981.896	78990.2	0.00524775	0.276773	0.00350568	0.28202	0	0.28202
QAT	H	2545820	92177.6	1.48751e+08	0	0	0	0	1.63258e+06	0	1.63258e+06	0	0.641278	0	0.641278	0	0.641278
REU																0
ROU	UM	19588715	26948.2	2.14275e+08	2.10302e+07	1.07359	8.54934e+06	5.87619e+06	2.45248e+06	2.67315e+06	8.32867e+06	0.299978	0.125199	0.136464	0.425177	0	0.425177
RUS	UM	145293260	25926.4	1.38294e+09	6.09905e+08	4.19775	1.43543e+08	1.13659e+08	2.1156e+07	2.9884e+07	1.34815e+08	0.782272	0.145609	0.20568	0.927881	-0.369922	0.557959
RWA	L	12202060	1934.97	1.02272e+07	91242.8	0.00747766	2.74266e+06	2.38175e+06	345906	360916	2.72765e+06	0.195192	0.0283481	0.0295783	0.22354	0	0.22354
SAS		1572520427														0
SAU	H	30977355	45795.5	6.40323e+08	1.72139e+06	0.0555691	111816	98446.7	7.02007e+06	13369	7.11852e+06	0.00317802	0.22662	0.000431574	0.229798	0	0.229798
SDN	LM	42714306	4613.95	1.20908e+08	1.01624e+07	0.237915	6.65599e+06	6.55845e+06	686249	97540.9	7.2447e+06	0.153542	0.016066	0.00228356	0.169608	0	0.169608
SEN	L	15475002	3259.19	2.27453e+07	6.08861e+06	0.393448	2.68785e+06	2.06984e+06	450100	618009	2.51994e+06	0.133754	0.0290856	0.0399359	0.162839	0	0.162839
SGP	H	5612253	95310.3	2.5524e+08	12266.8	0.00218572	11075.8	903.602	3.30351e+06	10172.2	3.30442e+06	0.000161005	0.588625	0.0018125	0.588786	-0.0308269	0.557959
SLB	LM	685672	2625.09		1.41621e+06	2.06543										0
SLE	L	7379299	1593.48	4.61601e+06	958880	0.129942	2.31732e+06	1.72289e+06	87089.8	594428	1.80998e+06	0.233477	0.0118019	0.0805535	0.245279	0	0.245279
SLV	LM	6213533	8617.92	2.72853e+07	572872	0.0921975	2.0513e+06	937427	911171	1.11388e+06	1.8486e+06	0.150869	0.146643	0.179266	0.297512	0	0.297512
SMR	H	33825	58201.5	2.20399e+06												0
SOM	L	14916629	1059.14	1.17565e+06	1.97388e+06	0.132328	5.84525e+06	5.83743e+06	2740.8	7820.61	5.84017e+06	0.391337	0.000183741	0.000524288	0.391521	0	0.391521
SRB	UM	7020858	16614	6.18875e+07	4.71133e+06	0.671048	3.38588e+06	3.02912e+06	2.38671e+06	356755	5.41583e+06	0.431446	0.339946	0.0508136	0.771392	0	0.771392
SSA		971179323														0
SSD	L	10259154	1590	8.33099e+06	4.19618e+06	0.409018	1.77649e+06	1.5898e+06	25196.5	186684	1.615e+06	0.154964	0.00245601	0.0181969	0.15742	0	0.15742
SSF		1080941647														0
SST		18865506														0
STP	LM	206970	3934.89	455340			61906.5	55830.2	16648.9	6076.33	72479.1	0.26975	0.0804413	0.0293585	0.350191	0	0.350191
SUR	UM	593713	17753.1	3.06744e+06	4.06455e+07	68.4599	635691	345677	49084.6	290014	394762	0.58223	0.082674	0.488475	0.664904	0	0.664904
SVK	H	5439232	30061.6	9.42856e+07	8.62179e+06	1.58511	6.34596e+06	2.58717e+06	2.22722e+06	3.75879e+06	4.81439e+06	0.475649	0.409474	0.691052	0.885123	-0.327164	0.557959
SVN	H	2066388	36507.6	4.40867e+07	3.86337e+06	1.86963	2.81628e+06	1.30661e+06	675175	1.50967e+06	1.98179e+06	0.632316	0.326741	0.730586	0.959058	-0.401099	0.557959
SWE	H	10057698	51948	5.11806e+08	5.69486e+07	5.66219	4.96745e+07	2.13915e+07	5.27656e+06	2.82831e+07	2.6668e+07	2.12687	0.524629	2.81208	2.6515	-2.09354	0.557959
SWZ	LM	1158195	8213.92	3.36396e+06	53954.7	0.0465851	1.31731e+06	555912	73751	761395	629663	0.479981	0.0636776	0.657398	0.543659	0	0.543659
SXM	H	38996														0
SYC	H	95843	28116.7	1.37239e+06			7955.38	3683.83	39910	4271.55	43593.8	0.0384361	0.41641	0.0445682	0.454846	0	0.454846
SYR	L	19224668	4189	1.37032e+07	816787	0.0424864	40691.1	34368	119867	6323.06	154236	0.00178771	0.00623509	0.000328903	0.00802279	0.12572	0.133743
TCA	H	39913														0
TCD	L	15622759	1579.76	1.01473e+07	4.17588e+06	0.267295	3.51788e+06	3.2276e+06	176154	290274	3.40376e+06	0.206596	0.0112755	0.0185802	0.217872	0	0.217872
TEA		2061449949														0
TEC		458235497														0
TGO	L	8057140	1972.7	4.8761e+06	876336	0.108765	1.84994e+06	1.31187e+06	325597	538076	1.63746e+06	0.16282	0.040411	0.0667825	0.203231	0	0.203231
THA	UM	71160187	17008	3.78247e+08	1.53031e+07	0.215052	1.72488e+07	8.06314e+06	5.35788e+06	9.18565e+06	1.3421e+07	0.11331	0.0752933	0.129084	0.188603	0	0.188603
TJK	L	9085946	3236.44	7.60869e+06	52672.1	0.00579709	1.39372e+06	1.29702e+06	171470	96703.9	1.46849e+06	0.14275	0.0188721	0.0106432	0.161622	0	0.161622
TKM	UM	6507061	13703.5	3.47107e+07	73448.6	0.0112875	0	0	1.08458e+06	0	1.08458e+06	0	0.166678	0	0.166678	0	0.166678
TLA		614776664														0
TLS	LM	1251703	3138.44		733162	0.585731										0
TMN		652312809														0
TON	UM	105356	6256.98													0
TSA		1572520427														0
TSS		1080941647														0
TTO	H	1356633	26213.9	2.10636e+07	174278	0.128463	128092	78665.4	284112	49427	362777	0.0579857	0.209424	0.0364336	0.26741	0	0.26741
TUN	LM	11650498	10874.9	4.30234e+07	376869	0.0323479	1.58164e+06	768591	584213	813046	1.3528e+06	0.0659707	0.0501449	0.0697864	0.116116	0.0176269	0.133743
TUR	UM	80312698	27582.8	8.42286e+08	4.5383e+07	0.565079	1.56113e+07	1.05262e+07	5.16235e+06	5.0851e+06	1.56886e+07	0.131065	0.0642781	0.0633163	0.195344	0	0.195344
TUV	UM	10869	4208.92													0
TWN	H		44559	1.70309e+08			0	0	2.13876e+06	0	2.13876e+06					0
TZA	L	55652890	2458.34	5.43991e+07	7.41789e+06	0.133289	1.13025e+07	1.02809e+07	445091	1.02161e+06	1.07259e+07	0.184732	0.00799762	0.0183568	0.192729	0	0.192729
UGA	L	40177388	2128.4	2.80125e+07	406300	0.0101127	2.01433e+07	1.81359e+07	576936	2.00735e+06	1.87128e+07	0.451396	0.0143597	0.0499622	0.465755	0	0.465755
UKR	LM	45436041	11860.6	1.16268e+08			9.50056e+06	5.32917e+06	3.5467e+06	4.1714e+06	8.87586e+06	0.117289	0.0780591	0.0918081	0.195349	0	0.195349
UMC		2731375253														0
URY	H	3388438	23107	5.78363e+07	4.59593e+06	1.35636	1.02775e+07	6.9382e+06	643105	3.33934e+06	7.58131e+06	2.04761	0.189794	0.985509	2.23741	0	2.23741
USA	H	326608609	59914.8	2.0211e+10	4.77451e+08	1.46184	2.87156e+08	2.35587e+08	1.13724e+08	5.15694e+07	3.49311e+08	0.721313	0.348196	0.157894	1.06951	-0.51155	0.557959
USR				49640.9												0
UZB	LM	31819178	6840.71	5.28343e+07	1.84357e+06	0.057939	16084.3	12366.2	796340	3718.13	808707	0.00038864	0.0250271	0.000116852	0.0254157	0.108327	0.133743
VCT	UM	105663	13633													0
VEN	UM	30565323	11078	3.61697e+08	5.0305e+07	1.64582	2.54314e+06	2.52461e+06	4.85079e+06	18528.4	7.3754e+06	0.0825972	0.158702	0.000606191	0.2413	0	0.2413
VGB	H	32699		759120			606.198	93.0758	16798.1	513.122	16891.2	0.00284644	0.51372	0.0156923	0.516567	0	0.516567
VIR	H	107281														0
VNM	LM	95176977	9050.69	2.6514e+08	1.53948e+07	0.161749	3.12041e+07	1.56307e+07	2.32838e+06	1.55734e+07	1.79591e+07	0.164228	0.0244637	0.163625	0.188691	0	0.188691
VUT	LM	278507	3031.19	667304			61044.6	35431.4	27075.3	25613.2	62506.8	0.127219	0.097216	0.0919661	0.224435	0	0.224435
WLD		7614748582														0
WSM	UM	205415	6238.8	896124			30532.9	23104.6	30257.3	7428.29	53361.9	0.112478	0.147298	0.0361623	0.259776	0	0.259776
XKX	LM	1791019														0
YEM	L	33090921	2456	2.94875e+07	934831	0.0282504	212849	199980	323475	12869.4	523454	0.00604334	0.00977533	0.000388911	0.0158187	0.117924	0.133743
ZAF	UM	57635162	13950.5	3.40026e+08	1.90765e+06	0.0330988	1.35918e+07	9.97124e+06	3.59289e+06	3.62058e+06	1.35641e+07	0.173006	0.0623385	0.062819	0.235345	0	0.235345
ZMB	LM	17441320	3395.48	2.51575e+07	1.20754e+07	0.692344	1.05802e+07	7.39773e+06	541243	3.18251e+06	7.93897e+06	0.42415	0.0310322	0.182469	0.455182	0	0.455182
ZWE	L	14812482	2331.78	2.40836e+07	1.84262e+06	0.124396	3.89872e+06	3.85179e+06	387874	46936.2	4.23966e+06	0.260036	0.0261856	0.00316869	0.286222	0	0.286222

## Sheet: A1-Blue water
ISO3	Income group	Population	GDP per capita (PPP, 2017 int $)	Final demand (thousand USD)	Biocapacity (Mm3)	Biocapacity (Mm3/cap)	Production footprint (Mm³)	Domestic use (Mm3)	Imports (Mm3)	Exports (Mm³)	Consumption footprint (Mm3)	Domestic use (Mm3/cap)	Imports (Mm3/cap)	Exports (Mm³/cap)	Consumption footprint (Mm3/cap)	Change needed (Mm3/cap)	Total mod (Mm3/cap)
ABW	H	108735		2.49667e+06			0	0	13.9676	0	13.9676	0	0.000128456	0	0.000128456	0	0.000128456
AFE		640058741														0
AFG	L	35688935	2096.09	2.8317e+07	22224	0.000622714	7838.1	5424.76	419.928	2413.33	5844.69	0.000152001	1.17663e-05	6.76213e-05	0.000163768	0	0.000163768
AFW		440882906														0
AGO	LM	30234839	7216.06	1.10371e+08	22620	0.000748144	257	234.587	242.064	22.4125	476.651	7.75884e-06	8.00614e-06	7.4128e-07	1.5765e-05	4.20776e-05	5.78426e-05
ALB	UM	2873457	12773.3	1.41766e+07	9984	0.00347456	333.5	139.471	62.3609	194.028	201.832	4.85378e-05	2.17024e-05	6.75243e-05	7.02402e-05	0	7.02402e-05
AND	H	73763		2.82629e+06	76.56	0.00103792	0	0	9.02294	0	9.02294	0	0.000122323	0	0.000122323	0	0.000122323
ANT				-171000			0	0	0.00568282	0						0
ARB		428315886														0
ARE	H	9223225	71182.4	2.67948e+08			1126.2	275.345	2100.63	850.853	2375.98	2.98534e-05	0.000227755	9.22512e-05	0.000257608	0	0.000257608
ARG	H	44288894	23597.1	6.37765e+08	136967	0.00309259	5708	4384.79	511.159	1323.22	4895.94	9.90042e-05	1.15415e-05	2.9877e-05	0.000110546	0	0.000110546
ARM	UM	2979400	12509.6	1.27971e+07	2974.2	0.000998255	453.6	338.668	65.6064	114.932	404.274	0.00011367	2.202e-05	3.85757e-05	0.00013569	0	0.00013569
ASM	UM	51586														0
ATG	H	90468	20777.9	1.30073e+06			0.4	0.371418	10.454	0.0285824	10.8254	4.10551e-06	0.000115555	3.15939e-07	0.00011966	0	0.00011966
AUS	H	24592588	48400.2	1.38225e+09	149220	0.00606768	14859	8632.79	1247.7	6226.21	9880.48	0.000351032	5.07347e-05	0.000253174	0.000401767	-0.000315526	8.62408e-05
AUT	H	8797566	54173	3.93906e+08	21714	0.00246818	319.5	223.299	886.254	96.2011	1109.55	2.53819e-05	0.000100739	1.0935e-05	0.00012612	-3.98796e-05	8.62408e-05
AZE	UM	9854033	14121.4	3.5467e+07	13587	0.00137883	1882.1	722.548	176.02	1159.55	898.568	7.33251e-05	1.78628e-05	0.000117673	9.11879e-05	0	9.11879e-05
BDI	L	11506762	750.788	2.51131e+06	1648.8	0.00014329	102.8	92.4855	14.5967	10.3145	107.082	8.03749e-06	1.26853e-06	8.96389e-07	9.30602e-06	4.85365e-05	5.78426e-05
BEL	H	11375158	50442.3	4.88195e+08	4884	0.000429357	607	331.024	1667.46	275.976	1998.49	2.91006e-05	0.000146588	2.42613e-05	0.000175689	-8.94478e-05	8.62408e-05
BEN	L	12039780	2933.84	9.71682e+06	7998	0.000664298	39.6	23.5462	30.4877	16.0538	54.0339	1.9557e-06	2.53225e-06	1.3334e-06	4.48795e-06	5.33546e-05	5.78426e-05
BFA	L	19894407	1978.15	1.49578e+07	6276	0.000315466	251.7	104.218	73.0915	147.482	177.31	5.23857e-06	3.67397e-06	7.41323e-06	8.91254e-06	4.893e-05	5.78426e-05
BGD	LM	162186147	4830.78	2.48355e+08	238158	0.00146842	8677.1	5945.5	585.726	2731.6	6531.23	3.66585e-05	3.61145e-06	1.68424e-05	4.027e-05	1.75726e-05	5.78426e-05
BGR	UM	6803468	21473.8	5.16843e+07	8117.4	0.00119313	529.2	249.947	210.587	279.254	460.533	3.67381e-05	3.09529e-05	4.10458e-05	6.7691e-05	0	6.7691e-05
BHR	H	1501116	48929.4	3.07201e+07			36.8	26.0165	195.243	10.7836	221.26	1.73314e-05	0.000130065	7.1837e-06	0.000147397	0	0.000147397
BHS	H	390485	34357.3	1.20081e+07			0	0	50.1772	0	50.1772	0	0.0001285	0	0.0001285	0	0.0001285
BIH	UM	3428682	13402.4	1.91187e+07	9036	0.00263542	54	26.2309	49.7822	27.7691	76.0131	7.65043e-06	1.45193e-05	8.09906e-06	2.21698e-05	0	2.21698e-05
BLR	UM	9458989	18356.1	3.25848e+07	18204	0.00192452	377	93.8224	752.47	283.178	846.292	9.91886e-06	7.95508e-05	2.99374e-05	8.94696e-05	0	8.94696e-05
BLZ	UM	373202	8873.75	1.73615e+06	4808.4	0.0128842	14.5	6.06388	9.39976	8.43612	15.4636	1.62482e-05	2.51868e-05	2.26047e-05	4.1435e-05	1.64075e-05	5.78426e-05
BMU	H	63578		5.38289e+06			0	0	29.2875	0	29.2875	0	0.000460655	0	0.000460655	0	0.000460655
BOL	LM	11344587	8244.93	3.95471e+07	106440	0.00938245	601	534.492	151.076	66.5074	685.568	4.71143e-05	1.3317e-05	5.86248e-06	6.04313e-05	0	6.04313e-05
BRA	UM	204703445	14477.9	1.98362e+09	803700	0.00392617	13826.5	12265.4	2103.46	1561.15	14368.8	5.99178e-05	1.02757e-05	7.62641e-06	7.01935e-05	0	7.01935e-05
BRB	H	280171	16199	4.5437e+06			7	5.1377	20.9481	1.8623	26.0858	1.83377e-05	7.47688e-05	6.647e-06	9.31066e-05	0	9.31066e-05
BRN	H	432772	60173.1	9.85035e+06	1592.4	0.00367954	1	0.702475	27.3375	0.297525	28.04	1.6232e-06	6.31685e-05	6.87487e-07	6.47917e-05	0	6.47917e-05
BTN	LM	754335	10986.9	2.76484e+06	19815	0.0262682	37.3	33.0264	18.171	4.27358	51.1974	4.37822e-05	2.40887e-05	5.66536e-06	6.78709e-05	0	6.78709e-05
BWA	UM	2266747	14656.8	1.5899e+07	5737.8	0.00253129	50.7	27.9379	47.5926	22.762	75.5306	1.23251e-05	2.0996e-05	1.00417e-05	3.33211e-05	2.45214e-05	5.78426e-05
CAF	L	4793511	839.6	2.02598e+06	12960	0.00270366	71.2	56.638	7.99461	14.562	64.6326	1.18156e-05	1.6678e-06	3.03785e-06	1.34834e-05	4.43592e-05	5.78426e-05
CAN	H	36545075	48317.2	1.6111e+09	582600	0.015942	4642.51	3036.88	5686.75	1605.62	8723.63	8.30996e-05	0.000155609	4.39355e-05	0.000238709	-0.000152468	8.62408e-05
CEB		102337501														0
CHE	H	8451840	69103.6	5.97725e+08	15732	0.00186137	228	167.687	1609.4	60.3129	1777.09	1.98403e-05	0.00019042	7.13606e-06	0.000210261	-0.00012402	8.62408e-05
CHI	H	164319														0
CHL	H	18558868	24546.9	2.68583e+08	236256	0.0127301	2797	1532.39	451.332	1264.62	1983.72	8.25689e-05	2.4319e-05	6.81409e-05	0.000106888	0	0.000106888
CHN	UM	1396215000	14243.5	1.14168e+10	520304	0.000372653	141972	130355	20630.9	11616.8	150986	9.33634e-05	1.47763e-05	8.32018e-06	0.00010814	0	0.00010814
CIV	LM	26733372	4750.94	3.35565e+07	13704	0.000512618	159.5	43.6859	92.9014	115.814	136.587	1.63413e-06	3.47511e-06	4.3322e-06	5.10925e-06	5.27333e-05	5.78426e-05
CMR	LM	24128601	3691.09	3.22636e+07	41850	0.00173446	234	110.892	54.4053	123.108	165.297	4.59586e-06	2.2548e-06	5.10217e-06	6.85066e-06	5.09919e-05	5.78426e-05
COD	L	87083398	1023.54	3.57235e+07	114494	0.00131476	104	73.2151	145.371	30.7849	218.586	8.40746e-07	1.66933e-06	3.53511e-07	2.51008e-06	5.53325e-05	5.78426e-05
COG	LM	5351011	4073.93	9.44885e+06	63688	0.011902	23.7	16.5864	36.1278	7.11365	52.7141	3.09967e-06	6.75158e-06	1.3294e-06	9.85125e-06	4.79913e-05	5.78426e-05
COL	UM	48131078	14334.9	3.25999e+08	253840	0.00527393	2383	1920.2	1130.08	462.8	3050.29	3.98953e-05	2.34793e-05	9.61541e-06	6.33746e-05	0	6.33746e-05
COM	L	756669	3240.18													0
CPV	LM	512893	6320.34	1.50369e+06			11.2	7.35258	12.91	3.84742	20.2625	1.43355e-05	2.51708e-05	7.5014e-06	3.95064e-05	1.83362e-05	5.78426e-05
CRI	UM	4913177	20168.2	5.43295e+07	35160	0.00715627	428	134.791	153.749	293.209	288.54	2.74346e-05	3.12932e-05	5.96781e-05	5.87278e-05	0	5.87278e-05
CSS		4366140														0
CUB	UM	11247829	21016	8.88958e+07	17439	0.00155043	2131	1236.25	74.2622	894.75	1310.51	0.00010991	6.60236e-06	7.95486e-05	0.000116512	0	0.000116512
CUW	H	160175														0
CYM	H	64535		4.9647e+06			0	0	16.4624	0	16.4624	0	0.000255093	0	0.000255093	0	0.000255093
CYP	H	1254275	38422	2.18236e+07	438.96	0.000349971	287	198.608	141.937	88.3921	340.545	0.000158345	0.000113163	7.04727e-05	0.000271507	-0.000185267	8.62408e-05
CZE	H	10594438	38824.9	1.42139e+08	3945.6	0.000372422	282.5	200.768	629.489	81.7313	830.258	1.89503e-05	5.9417e-05	7.71455e-06	7.83673e-05	0	7.83673e-05
DEU	H	82657002	53071.5	3.24085e+09	43776	0.00052961	3318.5	2368.58	9830.39	949.916	12199	2.86556e-05	0.00011893	1.14923e-05	0.000147585	-6.13447e-05	8.62408e-05
DJI	LM	1054841	4451.68	2.35001e+06			12.6	2.82975	27.9933	9.77025	30.8231	2.68263e-06	2.65379e-05	9.26229e-06	2.92206e-05	2.8622e-05	5.78426e-05
DMA	UM	68496	11511.6													0
DNK	H	5764980	55356.7	2.93781e+08	2218.8	0.000384876	440	145.885	510.118	294.115	656.003	2.53054e-05	8.84856e-05	5.10175e-05	0.000113791	-2.75502e-05	8.62408e-05
DOM	UM	10666843	16524.5	7.33187e+07	10826.4	0.00101496	1191	505.76	187.268	685.239	693.028	4.74142e-05	1.75561e-05	6.42401e-05	6.49703e-05	0	6.49703e-05
DZA	UM	41689299	11809.5	1.78171e+08	4264.2	0.000102285	2948	2793.84	452.895	154.153	3246.74	6.70159e-05	1.08636e-05	3.69768e-06	7.78794e-05	0	7.78794e-05
EAP		2087238522														0
EAR		3274060446														0
EAS		2333475520														0
ECA		244533821														0
ECS		915290996														0
ECU	UM	16759519	11679.4	1.0164e+08	87720	0.00523404	2443	1929.91	238.597	513.085	2168.51	0.000115153	1.42365e-05	3.06145e-05	0.00012939	0	0.00012939
EGY	LM	103696057	10435.9	2.15257e+08	32940	0.000317659	34447	23786.4	525.538	10660.6	24312	0.000229386	5.06806e-06	0.000102806	0.000234454	0	0.000234454
EMU		344810179														0
ERI	L	3150347	1585	5.6753e+06	3124.8	0.000991891	67.2	59.2513	12.8197	7.94864	72.071	1.88079e-05	4.06931e-06	2.5231e-06	2.28772e-05	3.49654e-05	5.78426e-05
ESP	H	46571232	39528.9	1.24572e+09	44010	0.000945004	15695	9270.65	4512.42	6424.36	13783.1	0.000199064	9.68929e-05	0.000137947	0.000295957	-0.000209716	8.62408e-05
EST	H	1317384	33821.9	2.55667e+07	5544	0.00420834	24	15.4252	98.5226	8.57485	113.948	1.1709e-05	7.47865e-05	6.50899e-06	8.64955e-05	-2.54727e-07	8.62408e-05
ETH	L	109666481	1987.97	2.01657e+07	19620	0.000178906	1845.4	212.27	281.587	1633.13	493.858	1.9356e-06	2.56767e-06	1.48917e-05	4.50327e-06	5.33393e-05	5.78426e-05
EUU		445321060														0
FCS		931222867														0
FIN	H	5508214	47570.1	2.48015e+08	25302	0.0045935	203.5	130.315	472.234	73.1853	602.549	2.36583e-05	8.57326e-05	1.32866e-05	0.000109391	-2.31501e-05	8.62408e-05
FJI	UM	918759	12822	4.45456e+06			12.5	4.01298	19.7399	8.48704	23.7529	4.36782e-06	2.14854e-05	9.23751e-06	2.58532e-05	3.19893e-05	5.78426e-05
FRA	H	66918020	44577.1	2.55492e+09	68538	0.00102421	5743	4122.4	6890.52	1620.6	11012.9	6.16038e-05	0.00010297	2.42177e-05	0.000164573	-7.83325e-05	8.62408e-05
FRO	H	50180														0
FSM	LM	109481	3522.29													0
GAB	UM	2156900	14478.1	1.00586e+07	16620	0.0077055	19.5	9.87307	22.6876	9.62688	32.5606	4.57744e-06	1.05186e-05	4.4633e-06	1.5096e-05	4.27465e-05	5.78426e-05
GBR	H	65966000	46372.4	2.69118e+09	35190	0.000533457	1241.5	1021.5	4731.89	220.004	5753.39	1.54852e-05	7.17323e-05	3.33511e-06	8.72175e-05	-9.76713e-07	8.62408e-05
GEO	LM	3728004	13589.7	1.83482e+07	18420	0.00494098	469	300.529	209.107	168.472	509.636	8.06138e-05	5.60908e-05	4.51909e-05	0.000136705	0	0.000136705
GHA	LM	30008354	4929.57	5.61052e+07	13764	0.000458672	100.3	36.5243	154.059	63.7756	190.583	1.21714e-06	5.13386e-06	2.12526e-06	6.351e-06	5.14916e-05	5.78426e-05
GIB	H	34245														0
GIN	L	12385659	2383.58	9.34428e+06	39000	0.0031488	93.5	48.7534	45.7554	44.7466	94.5088	3.93628e-06	3.69422e-06	3.61277e-06	7.6305e-06	5.02121e-05	5.78426e-05
GLP																0
GMB	L	2342189	1927.04	1.70739e+06	2758.8	0.00117787	9.9	8.40096	7.36111	1.49904	15.7621	3.5868e-06	3.14283e-06	6.40018e-07	6.72963e-06	5.11129e-05	5.78426e-05
GNB	L	1877072	1872.31		7020	0.00373987										0
GNQ	UM	1562396	19617.8		6474	0.00414364										0
GRC	H	10754679	28604.9	2.06818e+08	29658	0.00275768	4135.5	2535.2	678.179	1600.3	3213.38	0.00023573	6.3059e-05	0.0001488	0.000298789	-0.000212548	8.62408e-05
GRD	UM	115438	14870													0
GRL	H	56172		2.23416e+06			0	0	4.87381	0	4.87381	0	8.67658e-05	0	8.67658e-05	0	8.67658e-05
GTM	UM	16567357	8322.22	7.77879e+07	34734	0.00209653	377.5	150.906	175.071	226.594	325.977	9.10861e-06	1.05673e-05	1.36771e-05	1.96759e-05	3.81667e-05	5.78426e-05
GUF																0
GUM	H	163490														0
GUY	UM	768479	12193.6	2.95926e+07	16644	0.0216584	257.5	257.068	4.12213	0.432376	261.19	0.000334515	5.36401e-06	5.62638e-07	0.000339879	0	0.000339879
HIC		1380319892														0
HKG	H	7393200		3.83997e+08			0	0	2745.19	0	2745.19	0	0.000371313	0	0.000371313	0	0.000371313
HND	LM	9588137	5447.7	2.56293e+07	20864.4	0.00217606	182	53.2489	121.096	128.751	174.345	5.55362e-06	1.26298e-05	1.34281e-05	1.81834e-05	3.96591e-05	5.78426e-05
HPC		779389964														0
HRV	H	4041407	27211.8	5.18563e+07	26988	0.00667787	52.1	23.3378	140.97	28.7622	164.308	5.77467e-06	3.48815e-05	7.11687e-06	4.06561e-05	0	4.06561e-05
HTI	L	10817754	3187.79	1.03483e+07	6500.4	0.000600901	242.5	156.04	39.9758	86.46	196.016	1.44244e-05	3.69539e-06	7.99241e-06	1.81198e-05	3.97227e-05	5.78426e-05
HUN	H	9726756	29501.1	1.28785e+08	34740	0.00357159	567	273.885	311.993	293.116	585.878	2.81579e-05	3.20757e-05	3.0135e-05	6.02336e-05	0	6.02336e-05
IBD		4765998583														0
IBT		6440236993														0
IDA		1674238410														0
IDB		590024074														0
IDN	LM	267346658	10941.9	9.66417e+08	284886	0.00106561	12628	10490.2	1637.91	2137.77	12128.1	3.92383e-05	6.12654e-06	7.99624e-06	4.53648e-05	1.24777e-05	5.78426e-05
IDX		1084214336														0
IMN	H	83609														0
IND	LM	1359657400	6112.07	2.52209e+09	370044	0.00027216	243119	223701	9997.89	19418.3	233699	0.000164527	7.35324e-06	1.42818e-05	0.000171881	0	0.000171881
INX																0
IRL	H	4827445	77749.2	2.58428e+08	12468	0.00258273	256.5	56.312	536.827	200.188	593.139	1.1665e-05	0.000111203	4.14687e-05	0.000122868	-3.66273e-05	8.62408e-05
IRN	UM	85026754	15163.3	4.26327e+08	68607	0.000806887	40913	36159.1	1575.68	4753.93	37734.8	0.000425267	1.85316e-05	5.59109e-05	0.000443799	0	0.000443799
IRQ	UM	39337353	9976.85	1.62521e+08	42720	0.00108599	13698	12918.3	1093.88	779.68	14012.2	0.000328398	2.78077e-05	1.98203e-05	0.000356205	0	0.000356205
ISL	H	343400	55638.5	2.10664e+07	44154	0.128579	16	8.74491	46.5257	7.2551	55.2706	2.54657e-05	0.000135485	2.11272e-05	0.000160951	-7.47102e-05	8.62408e-05
ISR	H	8713300	39121.3	3.42809e+08	695.46	7.98159e-05	1061	843.02	1192.99	217.98	2036.01	9.6751e-05	0.000136916	2.50169e-05	0.000233667	-0.000147427	8.62408e-05
ITA	H	60002252	41581.1	1.85219e+09	68094	0.00113486	6721.5	5215.82	6059.93	1505.68	11275.8	8.6927e-05	0.000100995	2.50937e-05	0.000187922	-0.000101681	8.62408e-05
JAM	UM	2815764	9984.58	1.65937e+07			88.5	30.8264	62.5826	57.6736	93.409	1.09478e-05	2.22258e-05	2.04824e-05	3.31736e-05	0	3.31736e-05
JOR	UM	10234226	9629.1	4.81345e+07	541.74	5.29341e-05	448	190.01	527.551	257.99	717.561	1.85661e-05	5.15477e-05	2.52086e-05	7.01139e-05	0	7.01139e-05
JPN	H	126972000	41444.2	4.5499e+09	130500	0.00102779	4854	4531.05	11199.5	322.955	15730.5	3.56854e-05	8.82044e-05	2.54352e-06	0.00012389	-3.7649e-05	8.62408e-05
KAZ	UM	18651931	24863	1.41691e+08	43260	0.00231933	9037	6501.36	653.08	2535.65	7154.44	0.000348562	3.50141e-05	0.000135945	0.000383576	0	0.000383576
KEN	LM	49197766	4312.91	8.42449e+07	7278	0.000147934	498	435.478	241.797	62.522	677.275	8.85158e-06	4.9148e-06	1.27083e-06	1.37664e-05	4.40762e-05	5.78426e-05
KGZ	LM	6306696	5046.69	9.88063e+06	9241.2	0.0014653	3829.5	3370.16	580.619	459.342	3950.78	0.000534378	9.20639e-05	7.28341e-05	0.000626442	0	0.000626442
KHM	LM	16073372	3972.72	2.22009e+07	80066	0.00498128	891	161.093	96.6874	729.906	257.781	1.00224e-05	6.01538e-06	4.54109e-05	1.60378e-05	4.18048e-05	5.78426e-05
KIR	LM	120275	1962.32													0
KNA	H	47050	29333.4													0
KOR	H	51361911	40957.4	1.49666e+09	20556	0.000400219	1946.5	1833.17	5420.91	113.334	7254.08	3.56912e-05	0.000105543	2.20658e-06	0.000141235	-5.49938e-05	8.62408e-05
KWT	H	4154812	50007.3	1.01741e+08			94.1	88.0561	1841.9	6.04389	1929.96	2.11938e-05	0.000443318	1.45467e-06	0.000464512	-0.000378271	8.62408e-05
LAC		561957179														0
LAO	LM	7018147	7211.26	1.70701e+07	58292	0.0083059	463.5	70.32	77.9005	393.181	148.22	1.00197e-05	1.10999e-05	5.60234e-05	2.11196e-05	3.6723e-05	5.78426e-05
LBN	UM	6160128	17808.1	6.19899e+07	1849.2	0.000300189	820.5	297.116	592.859	523.384	889.975	4.82322e-05	9.62413e-05	8.49631e-05	0.000144473	0	0.000144473
LBR	L	4848925	1533.41	1.47362e+06	33120	0.00683038	11	7.34668	22.7652	3.65331	30.1119	1.51512e-06	4.69489e-06	7.53428e-07	6.21001e-06	5.16325e-05	5.78426e-05
LBY	UM	6738770	24212.9	2.50125e+07			1996.6	1846.55	90.809	150.045	1937.36	0.000274019	1.34756e-05	2.22659e-05	0.000287495	0	0.000287495
LCA	UM	176342	15247.5													0
LCN		630414986														0
LDC		1008993468														0
LIC		514890519														0
LIE	H	37962		5.11781e+06			0	0	41.6972	0	41.6972	0	0.00109839	0	0.00109839	0	0.00109839
LKA	LM	21453000	13584.2	8.93941e+07	8556	0.000398825	2104.5	732.562	824.896	1371.94	1557.46	3.41473e-05	3.84513e-05	6.3951e-05	7.25986e-05	0	7.25986e-05
LMC		2847931114														0
LMY		6094196886														0
LSO	LM	2157110	2571.69	3.18285e+06	1024.2	0.000474802	21	15.6927	20.984	5.30727	36.6768	7.2749e-06	9.72784e-06	2.46036e-06	1.70027e-05	4.08398e-05	5.78426e-05
LTE		2286095306														0
LTU	H	2842639	33761.9	4.70335e+07	8322	0.00292756	67	41.2741	173.397	25.726	214.671	1.45196e-05	6.09985e-05	9.05003e-06	7.55182e-05	0	7.55182e-05
LUX	H	596336	114986	6.21585e+07	723.6	0.00121341	16.9	4.63959	157.139	12.2604	161.779	7.78016e-06	0.000263507	2.05596e-05	0.000271288	-0.000185047	8.62408e-05
LVA	H	1942248	28673.6	3.012e+07	10182	0.00524238	38	25.8322	110.759	12.1678	136.591	1.33001e-05	5.70263e-05	6.26482e-06	7.03264e-05	0	7.03264e-05
MAC	H	648400		4.92409e+07			0	0	104.721	0	104.721	0	0.000161506	0	0.000161506	0	0.000161506
MAF	H	36837														0
MAR	LM	35446392	7921.62	1.12337e+08	12499.8	0.00035264	5392	1874.71	299.916	3517.29	2174.63	5.28887e-05	8.46112e-06	9.92284e-05	6.13498e-05	0	6.13498e-05
MCO	H	37678		6.42849e+06			0	0	26.6541	0	26.6541	0	0.000707419	0	0.000707419	0	0.000707419
MDA	LM	2755189	11651.2	163771	4019.63	0.00145893	569.5	101.544	4.47747	467.956	106.021	3.68555e-05	1.62511e-06	0.000169845	3.84806e-05	1.93619e-05	5.78426e-05
MDG	L	26788375	1548.16	1.18818e+07	45410	0.00169514	2585.5	469.26	43.7033	2116.24	512.963	1.75173e-05	1.63143e-06	7.89986e-05	1.91487e-05	3.86938e-05	5.78426e-05
MDV	UM	458287	18973.6	4.76728e+06			2.3	1.38452	44.2447	0.915478	45.6292	3.02108e-06	9.65436e-05	1.99761e-06	9.95647e-05	0	9.95647e-05
MEA		718887744														0
MEX	UM	123400057	20032.4	1.13688e+09	101303	0.000820935	16453.5	14373.4	6580.59	2080.11	20954	0.000116478	5.33273e-05	1.68566e-05	0.000169806	0	0.000169806
MHL	UM	46529	4634.94													0
MIC		5579306367														0
MKD	UM	1898657	15709.3	1.16402e+07	2479.2	0.00130577	166.2	122.186	67.0238	44.0136	189.21	6.4354e-05	3.53006e-05	2.31814e-05	9.96546e-05	0	9.96546e-05
MLI	L	19813011	2153.85	1.69363e+07	38880	0.00196235	1338.8	817.37	44.0774	521.429	861.447	4.12542e-05	2.22467e-06	2.63175e-05	4.34789e-05	1.43637e-05	5.78426e-05
MLT	H	467106	43516.6	1.03043e+07			15	8.38245	82.2627	6.61755	90.6452	1.79455e-05	0.000176112	1.41671e-05	0.000194057	-0.000107816	8.62408e-05
MMR	LM	51894938	4312.95	6.73813e+07	217664	0.00419432	2595	1516.52	37.597	1078.48	1554.12	2.92229e-05	7.24483e-07	2.0782e-05	2.99473e-05	2.78952e-05	5.78426e-05
MNA		656767614														0
MNE	UM	625982	19685.8	6.1494e+06			0	0	65.0145	0	65.0145	0	0.00010386	0	0.00010386	0	0.00010386
MNG	LM	3148917	11431.5	1.18786e+07	8172	0.00259518	207	69.1245	73.3031	137.875	142.428	2.19518e-05	2.32788e-05	4.3785e-05	4.52307e-05	1.26119e-05	5.78426e-05
MNP	H	49959														0
MOZ	L	28166393	1287.23	1.53891e+07	31958	0.00113461	211.5	56.1248	100.745	155.375	156.87	1.99261e-06	3.57679e-06	5.51634e-06	5.5694e-06	5.22732e-05	5.78426e-05
MRT	LM	4210600	5259.07	5.05199e+06	6106.8	0.00145034	168.5	69.7612	35.4093	98.7384	105.171	1.6568e-05	8.40957e-06	2.345e-05	2.49776e-05	3.2865e-05	5.78426e-05
MTQ																0
MUS	UM	1264887	22148.6	1.25632e+07			51.4	37.8949	198.996	13.5051	236.891	2.99591e-05	0.000157323	1.06769e-05	0.000187282	0	0.000187282
MWI	L	18039715	1454.78	6.47536e+06	4650.6	0.000257798	388.5	177.265	31.5597	211.234	208.825	9.82639e-06	1.74946e-06	1.17094e-05	1.15758e-05	4.62667e-05	5.78426e-05
MYS	UM	32355644	25935.1	2.82054e+08	117000	0.00361606	1662	1339.29	2371.85	322.713	3711.14	4.13927e-05	7.33057e-05	9.97392e-06	0.000114698	-2.84576e-05	8.62408e-05
NAC		363217262														0
NAM	UM	2506853	10335.3	1.45917e+07	19632	0.00783133	78	31.1576	48.8716	46.8424	80.0292	1.2429e-05	1.94952e-05	1.86857e-05	3.19242e-05	2.59184e-05	5.78426e-05
NCL	H	283546		9.83311e+06			3	2.47025	31.8959	0.529749	34.3661	8.71199e-06	0.000112489	1.8683e-06	0.000121201	0	0.000121201
NER	L	21435446	1155.97	1.25226e+07	14064	0.00065611	603.5	485.872	44.4057	117.628	530.277	2.26667e-05	2.0716e-06	5.48756e-06	2.47383e-05	3.31042e-05	5.78426e-05
NGA	LM	200254579	5120.01	3.61253e+08	77400	0.000386508	1751.5	1490.75	285.609	260.75	1776.36	7.44427e-06	1.42623e-06	1.30209e-06	8.8705e-06	4.89721e-05	5.78426e-05
NIC	LM	6316231	5915.38	1.50232e+07	34392	0.00544502	230.5	65.7029	49.6685	164.797	115.371	1.04022e-05	7.86363e-06	2.6091e-05	1.82659e-05	3.95767e-05	5.78426e-05
NLD	H	17131296	55088.6	7.34228e+08	31602	0.00184469	789	286.391	2758	502.609	3044.39	1.67174e-05	0.000160992	2.93387e-05	0.000177709	-9.14682e-05	8.62408e-05
NOR	H	5276968	64050.8	3.78071e+08	78900	0.0149518	184	140.944	821.385	43.0559	962.329	2.67093e-05	0.000155655	8.15921e-06	0.000182364	-9.61232e-05	8.62408e-05
NPL	L	28011258	3495.53	3.23126e+07	43418.8	0.00155005	3463	2891.75	154.221	571.246	3045.97	0.000103235	5.50566e-06	2.03934e-05	0.000108741	0	0.000108741
NRU	UM	11324	11746.6													0
NZL	H	4813600	42218.5	1.97337e+08	73620	0.0152942	1299	611.189	381.37	687.813	992.56	0.000126971	7.92277e-05	0.00014289	0.000206199	-0.000119958	8.62408e-05
OED		1348127258														0
OMN	H	4537396	34218.4	6.32526e+07			772.4	359.823	472.571	412.578	832.394	7.93016e-05	0.00010415	9.09283e-05	0.000183452	0	0.000183452
OSS		11989367														0
PAK	LM	223273967	4891.72	3.10839e+08	61943.8	0.000277434	75679.5	63466.3	418.091	12213.1	63884.4	0.000284253	1.87255e-06	5.47003e-05	0.000286126	0	0.000286126
PAN	H	4098707	30526.4	5.89437e+07	80664	0.0196804	142	76.3516	197.625	65.6484	273.976	1.86282e-05	4.82163e-05	1.60169e-05	6.68446e-05	0	6.68446e-05
PER	UM	31324637	12442.7	1.98728e+08	203984	0.00651193	4553.5	3286.38	500.938	1267.11	3787.32	0.000104914	1.59918e-05	4.04511e-05	0.000120905	0	0.000120905
PHL	LM	108119693	8001.76	3.50039e+08	124298	0.00114963	4386.7	4061.14	1209.8	325.562	5270.94	3.75615e-05	1.11895e-05	3.01113e-06	4.8751e-05	9.09159e-06	5.78426e-05
PLW	H	17812	17594.7													0
PNG	LM	9178714	3966.95	1.6522e+07	112670	0.0122751	44.5	6.38173	46.1579	38.1182	52.5396	6.95275e-07	5.0288e-06	4.1529e-06	5.72407e-06	5.21185e-05	5.78426e-05
POL	H	37974826	29958.1	4.98094e+08	17334	0.00045646	1340.5	908.157	1380.74	432.343	2288.9	2.39147e-05	3.63595e-05	1.1385e-05	6.02742e-05	0	6.02742e-05
PRE		920568701														0
PRI	H	3410837			2687.4	0.0007879										0
PRK	L	25817709	790	1.75941e+07	18726	0.000725316	1289.5	1226.52	22.3369	62.9794	1248.86	4.75069e-05	8.65177e-07	2.43939e-06	4.83721e-05	9.47045e-06	5.78426e-05
PRT	H	10300300	33044.7	2.16065e+08	29862	0.00289914	2355.5	1513.99	954.978	841.507	2468.97	0.000146985	9.27137e-05	8.16973e-05	0.000239699	-0.000153458	8.62408e-05
PRY	UM	6338660	13604.2	3.71772e+07	78882	0.0124446	323	217.92	119.934	105.08	337.854	3.43795e-05	1.8921e-05	1.65776e-05	5.33005e-05	4.54201e-06	5.78426e-05
PSE	LM	4454805		2.20194e+07	420.66	9.44284e-05	0	0	67.7582	0	67.7582	0	1.52101e-05	0	1.52101e-05	0	1.52101e-05
PSS		2509999														0
PST		1107161559														0
PYF	H	280087		5.6083e+06			2	1.44346	18.8663	0.55654	20.3098	5.15361e-06	6.73588e-05	1.98702e-06	7.25124e-05	0	7.25124e-05
QAT	H	2545820	92177.6	1.48751e+08			75.8	64.2556	1038.69	11.5444	1102.95	2.52397e-05	0.000407998	4.53465e-06	0.000433238	0	0.000433238
REU																0
ROU	UM	19588715	26948.2	2.14275e+08	64086	0.00327158	1476	1261.85	821.88	214.155	2083.73	6.44171e-05	4.19568e-05	1.09326e-05	0.000106374	-2.01331e-05	8.62408e-05
RUS	UM	145293260	25926.4	1.38294e+09	943467	0.00649354	14590	12816.2	9271.92	1773.82	22088.1	8.8209e-05	6.38152e-05	1.22086e-05	0.000152024	-6.57834e-05	8.62408e-05
RWA	L	12202060	1934.97	1.02272e+07	1812	0.0001485	32.2	25.6664	39.7627	6.53358	65.4291	2.10345e-06	3.25868e-06	5.35449e-07	5.36213e-06	5.24804e-05	5.78426e-05
SAS		1572520427														0
SAU	H	30977355	45795.5	6.40323e+08			8886.5	8343.23	4782.18	543.27	13125.4	0.000269333	0.000154377	1.75377e-05	0.00042371	0	0.00042371
SDN	LM	42714306	4613.95	1.20908e+08	13620	0.000318863	9211	9143.33	260.709	67.6663	9404.04	0.000214058	6.10356e-06	1.58416e-06	0.000220161	0	0.000220161
SEN	L	15475002	3259.19	2.27453e+07	11286	0.000729305	418.7	223.637	56.26	195.063	279.897	1.44515e-05	3.63554e-06	1.26051e-05	1.8087e-05	3.97555e-05	5.78426e-05
SGP	H	5612253	95310.3	2.5524e+08			17.4	10.3652	898.511	7.03484	908.876	1.84688e-06	0.000160098	1.25348e-06	0.000161945	-7.57042e-05	8.62408e-05
SLB	LM	685672	2625.09													0
SLE	L	7379299	1593.48	4.61601e+06	25680	0.00348001	60.5	50.9364	22.1767	9.56368	73.1131	6.9026e-06	3.00526e-06	1.29601e-06	9.90786e-06	4.79347e-05	5.78426e-05
SLV	LM	6213533	8617.92	2.72853e+07	9618	0.00154791	134	73.7668	79.7801	60.2332	153.547	1.1872e-05	1.28397e-05	9.69387e-06	2.47117e-05	3.31309e-05	5.78426e-05
SMR	H	33825	58201.5	2.20399e+06			0	0	26.5312	0	26.5312	0	0.000784367	0	0.000784367	0	0.000784367
SOM	L	14916629	1059.14	1.17565e+06	8067.6	0.000540846	833.6	829.559	0.598161	4.04107	830.157	5.5613e-05	4.01003e-08	2.7091e-07	5.56531e-05	2.18943e-06	5.78426e-05
SRB	UM	7020858	16614	6.18875e+07	53238	0.00758283	907	855.884	593.593	51.1153	1449.48	0.000121906	8.45471e-05	7.28049e-06	0.000206453	0	0.000206453
SSA		971179323														0
SSD	L	10259154	1590	8.33099e+06	5916.6	0.000576714	0	0	6.40728	0	6.40728	0	6.24543e-07	0	6.24543e-07	5.7218e-05	5.78426e-05
SSF		1080941647														0
SST		18865506														0
STP	LM	206970	3934.89	455340			0	0	3.75092	0	3.75092	0	1.8123e-05	0	1.8123e-05	3.97195e-05	5.78426e-05
SUR	UM	593713	17753.1	3.06744e+06	5924.2	0.00997822	80	26.6048	12.2419	53.3953	38.8467	4.48108e-05	2.06193e-05	8.99345e-05	6.54301e-05	0	6.54301e-05
SVK	H	5439232	30061.6	9.42856e+07	13944	0.0025636	256.6	164.262	357.715	92.3383	521.977	3.01995e-05	6.57657e-05	1.69764e-05	9.59652e-05	-9.72438e-06	8.62408e-05
SVN	H	2066388	36507.6	4.40867e+07	8874	0.00429445	82.9	57.9732	127.911	24.9268	185.884	2.80553e-05	6.19008e-05	1.2063e-05	8.99561e-05	-3.71536e-06	8.62408e-05
SWE	H	10057698	51948	5.11806e+08	41580	0.00413415	304.5	225.984	1143.66	78.5153	1369.64	2.24688e-05	0.00011371	7.80649e-06	0.000136179	-4.99378e-05	8.62408e-05
SWZ	LM	1158195	8213.92	3.36396e+06	826.2	0.000713351	308	120.582	17.7263	187.418	138.308	0.000104112	1.53051e-05	0.000161819	0.000119417	0	0.000119417
SXM	H	38996														0
SYC	H	95843	28116.7	1.37239e+06			6	1.61554	9.00552	4.38446	10.6211	1.68561e-05	9.39612e-05	4.57463e-05	0.000110817	-2.45765e-05	8.62408e-05
SYR	L	19224668	4189	1.37032e+07	6737.4	0.000350456	7226.4	4832.18	28.8816	2394.22	4861.06	0.000251353	1.50232e-06	0.000124539	0.000252856	0	0.000252856
TCA	H	39913														0
TCD	L	15622759	1579.76	1.01473e+07	12288	0.000786545	196	107.263	35.666	88.7368	142.929	6.86583e-06	2.28295e-06	5.67997e-06	9.14878e-06	4.86938e-05	5.78426e-05
TEA		2061449949														0
TEC		458235497														0
TGO	L	8057140	1972.7	4.8761e+06	3945	0.000489628	33.1	18.1835	20.4855	14.9165	38.669	2.25682e-06	2.54253e-06	1.85134e-06	4.79935e-06	5.30432e-05	5.78426e-05
THA	UM	71160187	17008	3.78247e+08	94623.8	0.00132973	17636.8	11124.2	1193.3	6512.65	12317.5	0.000156326	1.67693e-05	9.1521e-05	0.000173095	0	0.000173095
TJK	L	9085946	3236.44	7.60869e+06	9094.8	0.00100097	2969	1297.9	65.4579	1671.1	1363.35	0.000142846	7.2043e-06	0.000183922	0.000150051	0	0.000150051
TKM	UM	6507061	13703.5	3.47107e+07	11646	0.00178975	7198.5	3011.69	478.89	4186.81	3490.58	0.000462834	7.35954e-05	0.000643425	0.00053643	0	0.00053643
TLA		614776664														0
TLS	LM	1251703	3138.44		2487.6	0.00198737										0
TMN		652312809														0
TON	UM	105356	6256.98													0
TSA		1572520427														0
TSS		1080941647														0
TTO	H	1356633	26213.9	2.10636e+07	992.4	0.000731517	38	33.0953	78.429	4.90468	111.524	2.43952e-05	5.78115e-05	3.61533e-06	8.22067e-05	0	8.22067e-05
TUN	LM	11650498	10874.9	4.30234e+07	2362.98	0.000202822	1428	672.316	274.175	755.68	946.491	5.7707e-05	2.35333e-05	6.48625e-05	8.12404e-05	0	8.12404e-05
TUR	UM	80312698	27582.8	8.42286e+08	80778	0.00100579	16331.5	11247.5	3701.7	5083.95	14949.2	0.000140047	4.60911e-05	6.33019e-05	0.000186138	0	0.000186138
TUV	UM	10869	4208.92													0
TWN	H		44559	1.70309e+08			0	0	871.197	0	871.197					0
TZA	L	55652890	2458.34	5.43991e+07	23994	0.000431137	1097	755.538	92.6462	341.459	848.184	1.35759e-05	1.66471e-06	6.13552e-06	1.52406e-05	4.26019e-05	5.78426e-05
UGA	L	40177388	2128.4	2.80125e+07	4153.4	0.000103377	152.5	78.6961	59.8534	73.8035	138.55	1.95872e-06	1.48973e-06	1.83694e-06	3.44845e-06	5.43941e-05	5.78426e-05
UKR	LM	45436041	11860.6	1.16268e+08	46308	0.00101919	4071	3120.17	700.768	950.835	3820.94	6.86716e-05	1.54232e-05	2.09269e-05	8.40948e-05	0	8.40948e-05
UMC		2731375253														0
URY	H	3388438	23107	5.78363e+07	22440	0.00662252	888	532.679	100.982	355.321	633.661	0.000157205	2.98019e-05	0.000104863	0.000187007	0	0.000187007
USA	H	326608609	59914.8	2.0211e+10	946800	0.00289888	116840	86173.1	19965.6	30666.9	106139	0.000263842	6.11299e-05	9.3895e-05	0.000324972	-0.000238731	8.62408e-05
USR				49640.9			0	0	1.69854	0						0
UZB	LM	31819178	6840.71	5.28343e+07	20922	0.000657528	22716	16523.7	663.866	6192.32	17187.5	0.0005193	2.08637e-05	0.00019461	0.000540163	0	0.000540163
VCT	UM	105663	13633													0
VEN	UM	30565323	11078	3.61697e+08	114497	0.00374598	1926.5	1920.31	1466.57	6.19255	3386.87	6.28264e-05	4.79813e-05	2.026e-07	0.000110808	0	0.000110808
VGB	H	32699		759120			0	0	4.79329	0	4.79329	0	0.000146588	0	0.000146588	0	0.000146588
VIR	H	107281														0
VNM	LM	95176977	9050.69	2.6514e+08	171578	0.00180272	8387.5	5143.31	791.103	3244.19	5934.42	5.40395e-05	8.31191e-06	3.40858e-05	6.23514e-05	0	6.23514e-05
VUT	LM	278507	3031.19	667304			4	1.92682	6.04801	2.07318	7.97483	6.91839e-06	2.17158e-05	7.4439e-06	2.86342e-05	2.92083e-05	5.78426e-05
WLD		7614748582														0
WSM	UM	205415	6238.8	896124			5	3.70728	6.78092	1.29272	10.4882	1.80478e-05	3.30108e-05	6.29321e-06	5.10586e-05	6.78397e-06	5.78426e-05
XKX	LM	1791019														0
YEM	L	33090921	2456	2.94875e+07			2346.6	2211.08	110.175	135.521	2321.25	6.68182e-05	3.32947e-06	4.0954e-06	7.01476e-05	0	7.01476e-05
ZAF	UM	57635162	13950.5	3.40026e+08	18738	0.000325114	7122.2	5930.79	1229.9	1191.42	7160.68	0.000102902	2.13393e-05	2.06717e-05	0.000124242	0	0.000124242
ZMB	LM	17441320	3395.48	2.51575e+07	33264	0.0019072	389.5	131.148	193.42	258.352	324.569	7.51941e-06	1.10898e-05	1.48126e-05	1.86092e-05	3.92334e-05	5.78426e-05
ZWE	L	14812482	2331.78	2.40836e+07	6391.2	0.000431474	949.8	907.4	84.6079	42.4001	992.008	6.12591e-05	5.71193e-06	2.86246e-06	6.69711e-05	0	6.69711e-05

## Sheet: A1-Phosphorus
ISO3	Income group	Population	GDP per capita (PPP, 2017 int $)	Final demand (thousand USD)	Biocapacity (m3)	Biocapacity (m3/cap)	Production footprint (m³)	Domestic use (m3)	Imports (m3)	Exports (m³)	Consumption footprint (m3)	Domestic use (m3/cap)	Imports (m3/cap)	Exports (m³/cap)	Consumption footprint (m3/cap)	Change needed (m3/cap)	Total mod (m3/cap)
ABW	H	108735		2.49667e+06			0	0	2.15768e+09	0	2.15768e+09	0	19843.4	0	19843.4	0	19843.4
AFE		640058741														0
AFG	L	35688935	2096.09	2.8317e+07	7.60658e+10	2131.35	3.38118e+11	2.3345e+11	1.65919e+10	1.04668e+11	2.50042e+11	6541.25	464.904	2932.78	7006.15	532.2	7538.35
AFW		440882906														0
AGO	LM	30234839	7216.06	1.10371e+08	4.21015e+10	1392.48	6.4783e+10	5.90707e+10	4.34194e+10	5.71225e+09	1.0249e+11	1953.73	1436.07	188.929	3389.8	4148.55	7538.35
ALB	UM	2873457	12773.3	1.41766e+07	17648888800	6142.04	1.09e+11	3.35494e+10	7.67786e+09	7.54506e+10	4.12273e+10	11675.6	2672	26257.8	14347.6	0	14347.6
AND	H	73763		2.82629e+06			8.11065e+09	4.63316e+09	1.28242e+09	3.47749e+09	5.91558e+09	62811.4	17385.7	47144.1	80197.1	0	80197.1
ANT				-171000			0	0	418964	0						0
ARB		428315886														0
ARE	H	9223225	71182.4	2.67948e+08			9.87415e+09	1.97388e+09	1.80797e+11	7.90027e+09	1.82771e+11	214.012	19602.4	856.563	19816.4	0	19816.4
ARG	H	44288894	23597.1	6.37765e+08	3.13456e+12	70775.4	2.34772e+12	1.74791e+12	9.69914e+10	5.99803e+11	1.84491e+12	39466.2	2189.97	13543	41656.2	0	41656.2
ARM	UM	2979400	12509.6	1.27971e+07	4.03892e+08	135.562	4.42599e+10	3.04523e+10	6.4552e+09	1.38076e+10	3.69075e+10	10221	2166.61	4634.37	12387.6	0	12387.6
ASM	UM	51586			341640	6.62273										0
ATG	H	90468	20777.9	1.30073e+06			0	0	1.64754e+09	0	1.64754e+09	0	18211.3	0	18211.3	0	18211.3
AUS	H	24592588	48400.2	1.38225e+09	3.28391e+11	13353.2	2.96337e+12	1.71359e+12	2.41618e+11	1.24978e+12	1.95521e+12	69679.1	9824.81	50819.5	79503.9	-67732.4	11771.5
AUT	H	8797566	54173	3.93906e+08	5.9341e+11	67451.6	3.91091e+11	2.37906e+11	1.8736e+11	1.53185e+11	4.25265e+11	27042.2	21296.8	17412.2	48339	-36567.5	11771.5
AZE	UM	9854033	14121.4	3.5467e+07	1.46431e+10	1486.01	1.76812e+11	6.05466e+10	1.81632e+10	1.16265e+11	7.87098e+10	6144.35	1843.23	11798.8	7987.58	0	7987.58
BDI	L	11506762	750.788	2.51131e+06	2.18285e+10	1897.02	1.26776e+09	1.13378e+09	1.62197e+09	1.33985e+08	2.75575e+09	98.5317	140.958	11.644	239.489	7298.86	7538.35
BEL	H	11375158	50442.3	4.88195e+08	3.18655e+10	2801.32	5.14437e+11	2.28484e+11	3.49886e+11	2.85954e+11	5.78369e+11	20086.2	30758.8	25138.4	50844.9	-39073.4	11771.5
BEN	L	12039780	2933.84	9.71682e+06	5.54242e+10	4603.42	2.00412e+10	1.07266e+10	4.70848e+09	9.31463e+09	1.54351e+10	890.931	391.077	773.655	1282.01	6256.34	7538.35
BFA	L	19894407	1978.15	1.49578e+07	1.9936e+10	1002.09	9.69805e+10	3.76448e+10	9.41533e+09	5.93357e+10	4.70602e+10	1892.23	473.265	2982.53	2365.5	5172.85	7538.35
BGD	LM	162186147	4830.78	2.48355e+08	1.27993e+12	7891.71	7.19765e+11	4.8188e+11	4.60165e+10	2.37885e+11	5.27896e+11	2971.15	283.727	1466.74	3254.88	4283.47	7538.35
BGR	UM	6803468	21473.8	5.16843e+07	9.57645e+11	140758	1.75955e+11	2.22368e+10	3.45527e+10	1.53719e+11	5.67896e+10	3268.46	5078.7	22594.2	8347.15	0	8347.15
BHR	H	1501116	48929.4	3.07201e+07			0	0	2.03066e+10	0	2.03066e+10	0	13527.6	0	13527.6	0	13527.6
BHS	H	390485	34357.3	1.20081e+07			0	0	8.50906e+09	0	8.50906e+09	0	21791	0	21791	0	21791
BIH	UM	3428682	13402.4	1.91187e+07	6.57062e+09	1916.37	5.90435e+10	2.86808e+10	1.77237e+10	3.03627e+10	4.64045e+10	8364.96	5169.24	8855.5	13534.2	0	13534.2
BLR	UM	9458989	18356.1	3.25848e+07	5.58161e+10	5900.86	6.3869e+11	6.36517e+10	8.50526e+10	5.75038e+11	1.48704e+11	6729.23	8991.72	60792.8	15721	0	15721
BLZ	UM	373202	8873.75	1.73615e+06			2.99365e+09	6.39402e+08	1.43824e+09	2.35425e+09	2.07765e+09	1713.29	3853.8	6308.24	5567.08	1971.27	7538.35
BMU	H	63578		5.38289e+06			0	0	2.04404e+09	0	2.04404e+09	0	32150.1	0	32150.1	0	32150.1
BOL	LM	11344587	8244.93	3.95471e+07	9.94016e+10	8762.02	1.79903e+11	1.59495e+11	2.79953e+10	2.04081e+10	1.87491e+11	14059.2	2467.73	1798.93	16526.9	0	16526.9
BRA	UM	204703445	14477.9	1.98362e+09	4.16333e+13	203383	4.32797e+12	3.79477e+12	5.1962e+11	5.33194e+11	4.31439e+12	18537.9	2538.4	2604.72	21076.3	0	21076.3
BRB	H	280171	16199	4.5437e+06			0	0	3.70905e+09	0	3.70905e+09	0	13238.5	0	13238.5	0	13238.5
BRN	H	432772	60173.1	9.85035e+06			2.67484e+08	1.87901e+08	3.21307e+09	7.95834e+07	3.40097e+09	434.18	7424.39	183.892	7858.57	0	7858.57
BTN	LM	754335	10986.9	2.76484e+06			5.03595e+10	4.43118e+10	1.98031e+09	6.04767e+09	4.62921e+10	58742.9	2625.24	8017.23	61368.1	0	61368.1
BWA	UM	2266747	14656.8	1.5899e+07	1.31833e+10	5815.94	6.0371e+10	2.76337e+10	6.20742e+09	3.27373e+10	3.38411e+10	12190.9	2738.47	14442.4	14929.4	0	14929.4
CAF	L	4793511	839.6	2.02598e+06	1.89593e+11	39552.1	1.68796e+10	1.33211e+10	9.6174e+08	3.55851e+09	1.42829e+10	2778.99	200.634	742.36	2979.63	4558.72	7538.35
CAN	H	36545075	48317.2	1.6111e+09	6.78174e+12	185572	4.38971e+12	2.0758e+12	8.50611e+11	2.31391e+12	2.92641e+12	56801.1	23275.7	63316.6	80076.8	-68305.3	11771.5
CEB		102337501														0
CHE	H	8451840	69103.6	5.97725e+08	2.5761e+11	30479.7	1.5111e+11	1.1583e+11	3.35725e+11	3.52795e+10	4.51556e+11	13704.8	39722.2	4174.18	53426.9	-41655.4	11771.5
CHI	H	164319														0
CHL	H	18558868	24546.9	2.68583e+08	1.99261e+11	10736.7	4.21615e+11	2.15443e+11	8.47136e+10	2.06172e+11	3.00157e+11	11608.6	4564.59	11109.1	16173.2	0	16173.2
CHN	UM	1396215000	14243.5	1.14168e+10	2.78733e+12	1996.35	2.77332e+13	2.54713e+13	3.13609e+12	2.26192e+12	2.86074e+13	18243.1	2246.14	1620.04	20489.3	0	20489.3
CIV	LM	26733372	4750.94	3.35565e+07	1.08109e+11	4043.97	1.70651e+10	2.24422e+09	1.48017e+10	1.48209e+10	1.70459e+10	83.9482	553.678	554.396	637.626	6900.72	7538.35
CMR	LM	24128601	3691.09	3.22636e+07	2.77371e+11	11495.5	3.78889e+10	1.59792e+10	1.20233e+10	2.19097e+10	2.80025e+10	662.253	498.301	908.04	1160.55	6377.8	7538.35
COD	L	87083398	1023.54	3.57235e+07	1.2363e+12	14196.7	1.14536e+10	7.22002e+09	1.91761e+10	4.23363e+09	2.63961e+10	82.9093	220.203	48.6158	303.113	7235.24	7538.35
COG	LM	5351011	4073.93	9.44885e+06	1.45515e+12	271939	7.5417e+08	4.91502e+08	4.85102e+09	2.62668e+08	5.34252e+09	91.8521	906.562	49.0876	998.414	6539.94	7538.35
COL	UM	48131078	14334.9	3.25999e+08	7.17221e+11	14901.4	1.9036e+11	1.43222e+11	1.83774e+11	4.71377e+10	3.26996e+11	2975.67	3818.19	979.362	6793.87	744.483	7538.35
COM	L	756669	3240.18													0
CPV	LM	512893	6320.34	1.50369e+06			0	0	1.67617e+09	0	1.67617e+09	0	3268.06	0	3268.06	4270.29	7538.35
CRI	UM	4913177	20168.2	5.43295e+07	7.37294e+10	15006.5	2.14594e+10	2.65914e+09	2.63422e+10	1.88003e+10	2.90013e+10	541.227	5361.54	3826.5	5902.76	0	5902.76
CSS		4366140														0
CUB	UM	11247829	21016	8.88958e+07	2.66548e+09	236.977	7.31e+10	3.93642e+10	1.23905e+10	3.37358e+10	5.17547e+10	3499.71	1101.59	2999.32	4601.3	2937.05	7538.35
CUW	H	160175														0
CYM	H	64535		4.9647e+06			0	0	2.58934e+09	0	2.58934e+09	0	40123	0	40123	0	40123
CYP	H	1254275	38422	2.18236e+07	8.19573e+07	65.3423	0	0	1.57693e+10	0	1.57693e+10	0	12572.5	0	12572.5	-800.962	11771.5
CZE	H	10594438	38824.9	1.42139e+08	2.90381e+10	2740.88	3.7489e+11	2.08643e+11	1.43361e+11	1.66247e+11	3.52004e+11	19693.6	13531.7	15691.9	33225.4	-21453.9	11771.5
DEU	H	82657002	53071.5	3.24085e+09	1.10102e+12	13320.4	3.02611e+12	1.98735e+12	1.73702e+12	1.03876e+12	3.72437e+12	24043.3	21014.8	12567.1	45058.2	-33286.7	11771.5
DJI	LM	1054841	4451.68	2.35001e+06			4.84091e+09	5.41192e+08	3.26743e+09	4.29972e+09	3.80863e+09	513.056	3097.56	4076.18	3610.62	3927.73	7538.35
DMA	UM	68496	11511.6													0
DNK	H	5764980	55356.7	2.93781e+08	6.66469e+09	1156.06	5.35818e+11	1.333e+11	1.27931e+11	4.02518e+11	2.61231e+11	23122.4	22191	69821.2	45313.4	-33541.9	11771.5
DOM	UM	10666843	16524.5	7.33187e+07	6.54632e+09	613.707	4.35604e+10	1.59241e+10	3.12187e+10	2.76363e+10	4.71428e+10	1492.86	2926.7	2590.86	4419.57	3118.78	7538.35
DZA	UM	41689299	11809.5	1.78171e+08	1.96224e+09	47.0683	3.79136e+11	3.59139e+11	6.13509e+10	1.99968e+10	4.2049e+11	8614.65	1471.62	479.663	10086.3	0	10086.3
EAP		2087238522														0
EAR		3274060446														0
EAS		2333475520														0
ECA		244533821														0
ECS		915290996														0
ECU	UM	16759519	11679.4	1.0164e+08	9.62752e+10	5744.51	1.0872e+10	8.37273e+09	3.86682e+10	2.49928e+09	4.70409e+10	499.581	2307.24	149.126	2806.82	0	2806.82
EGY	LM	103696057	10435.9	2.15257e+08	2.90646e+11	2802.86	3.42686e+11	2.34546e+11	7.08092e+10	1.0814e+11	3.05356e+11	2261.86	682.853	1042.86	2944.72	4593.63	7538.35
EMU		344810179														0
ERI	L	3150347	1585	5.6753e+06			4.5734e+10	4.00585e+10	1.57472e+09	5.67553e+09	4.16332e+10	12715.6	499.857	1801.56	13215.4	0	13215.4
ESP	H	46571232	39528.9	1.24572e+09	1.6952e+11	3640.03	2.1304e+12	1.24743e+12	7.47763e+11	8.82967e+11	1.9952e+12	26785.5	16056.3	18959.5	42841.9	-31070.3	11771.5
EST	H	1317384	33821.9	2.55667e+07	3.56629e+10	27071	4.81526e+10	1.9906e+10	2.3138e+10	2.82466e+10	4.30439e+10	15110.2	17563.6	21441.4	32673.8	-20902.3	11771.5
ETH	L	109666481	1987.97	2.01657e+07	1.55557e+11	1418.46	2.69282e+11	2.6528e+10	2.60339e+10	2.42754e+11	5.25618e+10	241.897	237.391	2213.57	479.288	7059.06	7538.35
EUU		445321060														0
FCS		931222867														0
FIN	H	5508214	47570.1	2.48015e+08	2.45799e+11	44624.1	4.06324e+11	1.88288e+11	1.02338e+11	2.18036e+11	2.90626e+11	34183.2	18579.1	39583.8	52762.4	-40990.9	11771.5
FJI	UM	918759	12822	4.45456e+06	3.80275e+09	4139.01	0	0	3.49242e+09	0	3.49242e+09	0	3801.23	0	3801.23	3737.12	7538.35
FRA	H	66918020	44577.1	2.55492e+09	3.23274e+11	4830.89	3.87801e+12	2.57016e+12	1.09304e+12	1.30785e+12	3.6632e+12	38407.6	16334	19544.1	54741.6	-42970.1	11771.5
FRO	H	50180														0
FSM	LM	109481	3522.29		7958460	72.6926										0
GAB	UM	2156900	14478.1	1.00586e+07	5.54582e+11	257120	2.63601e+08	7.13279e+07	3.94739e+09	1.92273e+08	4.01872e+09	33.0697	1830.12	89.1432	1863.19	5675.16	7538.35
GBR	H	65966000	46372.4	2.69118e+09	8.64496e+10	1310.52	2.0506e+12	1.63704e+12	1.32254e+12	4.13565e+11	2.95958e+12	24816.4	20048.8	6269.37	44865.2	-33093.7	11771.5
GEO	LM	3728004	13589.7	1.83482e+07	2.48949e+10	6677.8	8.35859e+10	4.81586e+10	2.58571e+10	3.54272e+10	7.40157e+10	12918.1	6935.9	9503	19854	0	19854
GHA	LM	30008354	4929.57	5.61052e+07	7.53876e+10	2512.22	1.6375e+10	2.06786e+09	2.25744e+10	1.43072e+10	2.46423e+10	68.9093	752.271	476.774	821.18	6717.17	7538.35
GIB	H	34245														0
GIN	L	12385659	2383.58	9.34428e+06	1.14487e+11	9243.52	2.74539e+10	1.22341e+10	6.44116e+09	1.52198e+10	1.86753e+10	987.767	520.05	1228.82	1507.82	6030.53	7538.35
GLP					149986384											0
GMB	L	2342189	1927.04	1.70739e+06			2.15378e+09	1.79982e+09	9.39083e+08	3.53965e+08	2.7389e+09	768.435	400.942	151.126	1169.38	6368.97	7538.35
GNB	L	1877072	1872.31		1.87516e+10	9989.8										0
GNQ	UM	1562396	19617.8													0
GRC	H	10754679	28604.9	2.06818e+08	1.32983e+10	1236.52	2.39831e+11	1.47101e+11	1.17219e+11	9.27303e+10	2.6432e+11	13677.9	10899.3	8622.32	24577.2	-12805.7	11771.5
GRD	UM	115438	14870													0
GRL	H	56172		2.23416e+06			0	0	1.00963e+09	0	1.00963e+09	0	17973.9	0	17973.9	0	17973.9
GTM	UM	16567357	8322.22	7.77879e+07	3.76464e+10	2272.32	9.26675e+10	3.33714e+10	2.96713e+10	5.92961e+10	6.30427e+10	2014.28	1790.95	3579.09	3805.23	3733.12	7538.35
GUF					9.12891e+10											0
GUM	H	163490			6562992	40.1431										0
GUY	UM	768479	12193.6	2.95926e+07	1.32553e+11	172487	2.23802e+09	2.23422e+09	5.9614e+08	3.80096e+06	2.83036e+09	2907.33	775.74	4.94608	3683.07	3855.28	7538.35
HIC		1380319892														0
HKG	H	7393200		3.83997e+08	4.58292e+06	0.619884	0	0	4.76263e+11	0	4.76263e+11	0	64419.1	0	64419.1	0	64419.1
HND	LM	9588137	5447.7	2.56293e+07	2.93728e+09	306.345	5.34555e+10	1.34705e+10	2.02181e+10	3.9985e+10	3.36886e+10	1404.91	2108.65	4170.26	3513.57	4024.78	7538.35
HPC		779389964														0
HRV	H	4041407	27211.8	5.18563e+07	16340120856	4043.18	1.1266e+11	4.91012e+10	3.36328e+10	6.35588e+10	8.2734e+10	12149.5	8322.04	15726.9	20471.6	-8700.08	11771.5
HTI	L	10817754	3187.79	1.03483e+07			3.30465e+10	2.10007e+10	5.94516e+09	1.20458e+10	2.69458e+10	1941.31	549.574	1113.53	2490.89	5047.46	7538.35
HUN	H	9726756	29501.1	1.28785e+08	7.00643e+11	72032.5	3.60837e+11	1.31456e+11	5.92104e+10	2.29381e+11	1.90666e+11	13514.8	6087.38	23582.5	19602.2	-7830.72	11771.5
IBD		4765998583														0
IBT		6440236993														0
IDA		1674238410														0
IDB		590024074														0
IDN	LM	267346658	10941.9	9.66417e+08	3.93119e+10	147.045	1.51014e+11	1.22627e+11	2.44178e+11	2.83868e+10	3.66805e+11	458.682	913.339	106.18	1372.02	6166.33	7538.35
IDX		1084214336														0
IMN	H	83609														0
IND	LM	1359657400	6112.07	2.52209e+09	1.87719e+12	1380.63	8.30517e+12	7.61427e+12	7.69731e+11	6.90901e+11	8.384e+12	5600.14	566.122	508.143	6166.26	1372.09	7538.35
INX																0
IRL	H	4827445	77749.2	2.58428e+08	4.03937e+10	8367.5	8.35154e+11	6.44331e+10	1.26519e+11	7.70721e+11	1.90952e+11	13347.3	26208.2	159654	39555.4	-27783.9	11771.5
IRN	UM	85026754	15163.3	4.26327e+08	5.01215e+10	589.479	1.41837e+12	1.25222e+12	1.29518e+11	1.66148e+11	1.38174e+12	14727.4	1523.26	1954.07	16250.7	0	16250.7
IRQ	UM	39337353	9976.85	1.62521e+08	97013496000	2466.19	2.76554e+11	2.61654e+11	5.54322e+10	1.48998e+10	3.17086e+11	6651.55	1409.15	378.77	8060.69	0	8060.69
ISL	H	343400	55638.5	2.10664e+07	6.25381e+10	182114	1.0107e+09	1.34328e+08	9.76992e+09	8.76377e+08	9.90424e+09	391.172	28450.5	2552.06	28841.7	-17070.2	11771.5
ISR	H	8713300	39121.3	3.42809e+08	1.65505e+09	189.945	1.58364e+10	1.2439e+10	2.02876e+11	3.39736e+09	2.15315e+11	1427.59	23283.5	389.905	24711.1	-12939.6	11771.5
ITA	H	60002252	41581.1	1.85219e+09	1.81395e+11	3023.14	1.69703e+12	1.27647e+12	1.02395e+12	4.20552e+11	2.30042e+12	21273.8	17065.2	7008.94	38338.9	-26567.4	11771.5
JAM	UM	2815764	9984.58	1.65937e+07	3.04902e+09	1082.84	0	0	1.0928e+10	0	1.0928e+10	0	3881.01	0	3881.01	0	3881.01
JOR	UM	10234226	9629.1	4.81345e+07	4.43896e+08	43.3737	2.39267e+10	9.14933e+09	3.57423e+10	1.47774e+10	4.48916e+10	893.993	3492.43	1443.92	4386.42	0	4386.42
JPN	H	126972000	41444.2	4.5499e+09	5.22297e+11	4113.48	1.04238e+12	9.62968e+11	1.81926e+12	7.94069e+10	2.78223e+12	7584.1	14328	625.389	21912.1	-10140.6	11771.5
KAZ	UM	18651931	24863	1.41691e+08	2.08605e+11	11184.1	4.72399e+11	4.04151e+11	1.08671e+11	6.82482e+10	5.12822e+11	21668	5826.26	3659.04	27494.3	0	27494.3
KEN	LM	49197766	4312.91	8.42449e+07	5.49268e+09	111.645	1.56603e+10	1.34853e+10	2.50964e+10	2.17503e+09	3.85816e+10	274.103	510.112	44.2099	784.215	6754.13	7538.35
KGZ	LM	6306696	5046.69	9.88063e+06	5.49133e+10	8707.15	9.62568e+10	8.48172e+10	1.06284e+10	1.14396e+10	9.54456e+10	13448.8	1685.26	1813.89	15134	0	15134
KHM	LM	16073372	3972.72	2.22009e+07	2.09298e+12	130214	8.45265e+10	1.4766e+10	1.13418e+10	6.97605e+10	2.61078e+10	918.663	705.625	4340.13	1624.29	5914.06	7538.35
KIR	LM	120275	1962.32													0
KNA	H	47050	29333.4													0
KOR	H	51361911	40957.4	1.49666e+09	5.07881e+10	988.828	4.96295e+11	4.68651e+11	8.09789e+11	2.7644e+10	1.27844e+12	9124.48	15766.3	538.221	24890.8	-13119.3	11771.5
KWT	H	4154812	50007.3	1.01741e+08			9.51211e+09	8.50057e+09	1.8204e+11	1.01154e+09	1.90541e+11	2045.96	43814.3	243.463	45860.2	-34088.7	11771.5
LAC		561957179														0
LAO	LM	7018147	7211.26	1.70701e+07	1.00121e+12	142661	6.8424e+10	7.81657e+09	5.60437e+09	6.06074e+10	1.34209e+10	1113.77	798.554	8635.82	1912.32	5626.03	7538.35
LBN	UM	6160128	17808.1	6.19899e+07			4.50725e+10	1.47141e+10	4.43199e+10	3.03584e+10	5.9034e+10	2388.6	7194.64	4928.2	9583.24	0	9583.24
LBR	L	4848925	1533.41	1.47362e+06	9.42518e+10	19437.7	1.2428e+09	6.1834e+08	2.37728e+09	6.24465e+08	2.99562e+09	127.521	490.269	128.784	617.79	6920.56	7538.35
LBY	UM	6738770	24212.9	2.50125e+07			3.233e+10	2.98322e+10	1.24924e+10	2.49782e+09	4.23245e+10	4426.95	1853.8	370.664	6280.75	1257.6	7538.35
LCA	UM	176342	15247.5													0
LCN		630414986														0
LDC		1008993468														0
LIC		514890519														0
LIE	H	37962		5.11781e+06			0	0	4.23992e+09	0	4.23992e+09	0	111689	0	111689	0	111689
LKA	LM	21453000	13584.2	8.93941e+07	2.5688e+10	1197.41	1.85101e+10	6.21032e+09	6.42606e+10	1.22998e+10	7.04709e+10	289.485	2995.41	573.336	3284.9	4253.45	7538.35
LMC		2847931114														0
LMY		6094196886														0
LSO	LM	2157110	2571.69	3.18285e+06	1.15913e+10	5373.52	3.37311e+10	2.42136e+10	3.03685e+09	9.51754e+09	2.72504e+10	11225	1407.83	4412.17	12632.8	0	12632.8
LTE		2286095306														0
LTU	H	2842639	33761.9	4.70335e+07	7.09228e+10	24949.6	2.02734e+11	8.85913e+10	4.95177e+10	1.14143e+11	1.38109e+11	31165.2	17419.6	40153.8	48584.8	-36813.3	11771.5
LUX	H	596336	114986	6.21585e+07	3.62313e+09	6075.65	3.71885e+10	4.18688e+09	5.34655e+10	3.30016e+10	5.76524e+10	7021.02	89656.7	55340.6	96677.7	-84906.2	11771.5
LVA	H	1942248	28673.6	3.012e+07	1.14634e+11	59021.2	7.55175e+10	3.15537e+10	4.50073e+10	4.39637e+10	7.65611e+10	16246	23172.8	22635.5	39418.8	-27647.3	11771.5
MAC	H	648400		4.92409e+07			0	0	1.82755e+10	0	1.82755e+10	0	28185.5	0	28185.5	0	28185.5
MAF	H	36837														0
MAR	LM	35446392	7921.62	1.12337e+08	9.86421e+09	278.285	3.66111e+11	1.21215e+11	5.39797e+10	2.44896e+11	1.75195e+11	3419.67	1522.86	6908.92	4942.52	2595.83	7538.35
MCO	H	37678		6.42849e+06			0	0	2.73252e+09	0	2.73252e+09	0	72522.9	0	72522.9	0	72522.9
MDA	LM	2755189	11651.2	163771	9.46218e+09	3434.31	3.64395e+10	4.91889e+09	5.07208e+08	3.15206e+10	5.4261e+09	1785.32	184.092	11440.5	1969.41	5568.94	7538.35
MDG	L	26788375	1548.16	1.18818e+07	1.77751e+11	6635.38	1.35289e+11	2.22886e+10	5.87833e+09	1.13e+11	2.81669e+10	832.025	219.436	4218.26	1051.46	6486.89	7538.35
MDV	UM	458287	18973.6	4.76728e+06			0	0	3.28129e+09	0	3.28129e+09	0	7159.9	0	7159.9	378.453	7538.35
MEA		718887744														0
MEX	UM	123400057	20032.4	1.13688e+09	5.85861e+11	4747.65	1.47768e+12	1.27614e+12	1.14732e+12	2.01539e+11	2.42347e+12	10341.5	9297.59	1633.22	19639.1	0	19639.1
MHL	UM	46529	4634.94													0
MIC		5579306367														0
MKD	UM	1898657	15709.3	1.16402e+07	1.80701e+09	951.732	7.30916e+10	5.13059e+10	1.10609e+10	2.17857e+10	6.23668e+10	27022.2	5825.62	11474.3	32847.8	0	32847.8
MLI	L	19813011	2153.85	1.69363e+07	5.10995e+11	25790.9	1.34224e+11	7.94413e+10	6.22416e+09	5.47827e+10	8.56654e+10	4009.55	314.145	2764.99	4323.7	3214.65	7538.35
MLT	H	467106	43516.6	1.03043e+07			0	0	1.74035e+10	0	1.74035e+10	0	37258.1	0	37258.1	-25486.6	11771.5
MMR	LM	51894938	4312.95	6.73813e+07	1.45814e+12	28098	3.04185e+11	1.75444e+11	3.74773e+09	1.28741e+11	1.79192e+11	3380.75	72.2177	2480.8	3452.97	4085.38	7538.35
MNA		656767614														0
MNE	UM	625982	19685.8	6.1494e+06			1.67183e+10	1.21444e+10	7.38486e+09	4.57394e+09	1.95292e+10	19400.5	11797.2	7306.82	31197.7	0	31197.7
MNG	LM	3148917	11431.5	1.18786e+07	1.13194e+10	3594.69	4.87601e+11	1.43808e+11	1.47653e+10	3.43794e+11	1.58573e+11	45668.9	4689	109178	50357.9	0	50357.9
MNP	H	49959														0
MOZ	L	28166393	1287.23	1.53891e+07	1.51612e+11	5382.73	3.12605e+10	7.46372e+09	1.06051e+10	2.37968e+10	1.80689e+10	264.987	376.518	844.866	641.504	6896.85	7538.35
MRT	LM	4210600	5259.07	5.05199e+06	5.73544e+08	136.214	7.6929e+10	2.69532e+10	4.45358e+09	4.99758e+10	3.14068e+10	6401.28	1057.71	11869	7458.99	79.3582	7538.35
MTQ					8541000											0
MUS	UM	1264887	22148.6	1.25632e+07	5.05572e+08	399.698	0	0	1.89047e+10	0	1.89047e+10	0	14945.8	0	14945.8	0	14945.8
MWI	L	18039715	1454.78	6.47536e+06	7.791e+10	4318.8	1.87885e+10	8.10122e+09	3.48713e+09	1.06873e+10	1.15884e+10	449.077	193.303	592.433	642.38	6895.97	7538.35
MYS	UM	32355644	25935.1	2.82054e+08	2.52617e+11	7807.49	3.14559e+10	2.5288e+10	3.10973e+11	6.16788e+09	3.36261e+11	781.565	9611.09	190.628	10392.7	0	10392.7
NAC		363217262														0
NAM	UM	2506853	10335.3	1.45917e+07	6.08481e+10	24272.7	5.03455e+10	1.67905e+10	6.50623e+09	3.3555e+10	2.32968e+10	6697.85	2595.38	13385.3	9293.23	0	9293.23
NCL	H	283546		9.83311e+06	1.27225e+09	4486.93	0	0	6.89119e+09	0	6.89119e+09	0	24303.6	0	24303.6	0	24303.6
NER	L	21435446	1155.97	1.25226e+07	9.80945e+10	4576.28	7.83955e+10	6.2875e+10	9.00309e+09	1.55205e+10	7.18781e+10	2933.23	420.01	724.058	3353.24	4185.11	7538.35
NGA	LM	200254579	5120.01	3.61253e+08	3.51742e+11	1756.47	2.72868e+11	2.27756e+11	4.63932e+10	4.51121e+10	2.7415e+11	1137.33	231.671	225.274	1369.01	6169.34	7538.35
NIC	LM	6316231	5915.38	1.50232e+07	4.45116e+10	7047.18	3.29394e+10	7.14969e+09	7.70394e+09	2.57897e+10	1.48536e+10	1131.96	1219.71	4083.08	2351.66	5186.69	7538.35
NLD	H	17131296	55088.6	7.34228e+08	1.05287e+11	6145.86	1.02466e+12	2.33518e+11	5.02216e+11	7.91145e+11	7.35734e+11	13631.1	29315.7	46181.3	42946.8	-31175.3	11771.5
NOR	H	5276968	64050.8	3.78071e+08	1.97282e+11	37385.4	2.67634e+11	1.82295e+11	1.611e+11	8.5339e+10	3.43394e+11	34545.3	30528.8	16172	65074.2	-53302.7	11771.5
NPL	L	28011258	3495.53	3.23126e+07	3.1978e+11	11416.1	4.45418e+11	3.71266e+11	1.18253e+10	7.41521e+10	3.83091e+11	13254.2	422.163	2647.22	13676.3	0	13676.3
NRU	UM	11324	11746.6													0
NZL	H	4813600	42218.5	1.97337e+08	1.98887e+11	41317.7	1.51919e+12	6.43707e+11	5.8545e+10	8.75486e+11	7.02252e+11	133727	12162.4	181878	145889	-134118	11771.5
OED		1348127258														0
OMN	H	4537396	34218.4	6.32526e+07	1.64436e+07	3.62401	8.7948e+09	4.01179e+09	3.21798e+10	4.78301e+09	3.61916e+10	884.162	7092.13	1054.13	7976.29	0	7976.29
OSS		11989367														0
PAK	LM	223273967	4891.72	3.10839e+08	2.79123e+11	1250.14	2.17382e+12	1.82107e+12	4.9169e+10	3.5275e+11	1.87024e+12	8156.23	220.218	1579.9	8376.45	0	8376.45
PAN	H	4098707	30526.4	5.89437e+07	3.35712e+10	8190.68	9.1377e+09	2.16238e+09	3.4212e+10	6.97532e+09	3.63744e+10	527.576	8347.03	1701.83	8874.6	0	8874.6
PER	UM	31324637	12442.7	1.98728e+08	2.52104e+10	804.809	1.23059e+11	8.74887e+10	9.46856e+10	3.55708e+10	1.82174e+11	2792.97	3022.72	1135.55	5815.69	1722.66	7538.35
PHL	LM	108119693	8001.76	3.50039e+08	5.55781e+10	514.042	1.39672e+11	1.24583e+11	1.83149e+11	1.50898e+10	3.07732e+11	1152.27	1693.95	139.566	2846.21	4692.14	7538.35
PLW	H	17812	17594.7		5.52318e+06	310.082										0
PNG	LM	9178714	3966.95	1.6522e+07	1.8683e+11	20354.7	4.61494e+09	1.75571e+08	7.64072e+09	4.43936e+09	7.81629e+09	19.128	832.439	483.659	851.567	6686.78	7538.35
POL	H	37974826	29958.1	4.98094e+08	1.80164e+11	4744.31	1.92309e+12	1.16205e+12	2.59202e+11	7.61041e+11	1.42125e+12	30600.5	6825.62	20040.7	37426.2	-25654.7	11771.5
PRE		920568701														0
PRI	H	3410837			4.47135e+09	1310.93										0
PRK	L	25817709	790	1.75941e+07	1.58562e+10	614.16	1.9585e+11	1.84685e+11	2.16131e+09	1.11642e+10	1.86847e+11	7153.43	83.7141	432.424	7237.15	301.201	7538.35
PRT	H	10300300	33044.7	2.16065e+08	4.60949e+10	4475.1	2.94566e+11	1.86843e+11	1.66775e+11	1.07722e+11	3.53619e+11	18139.6	16191.3	10458.2	34330.9	-22559.4	11771.5
PRY	UM	6338660	13604.2	3.71772e+07	1.78146e+11	28104.6	3.11972e+11	2.08071e+11	3.64135e+10	1.03901e+11	2.44485e+11	32825.7	5744.67	16391.7	38570.4	0	38570.4
PSE	LM	4454805		2.20194e+07			1.13619e+10	8.83234e+09	8.50671e+09	2.52956e+09	1.7339e+10	1982.66	1909.56	567.827	3892.21	0	3892.21
PSS		2509999														0
PST		1107161559														0
PYF	H	280087		5.6083e+06	6.29099e+08	2246.09	0	0	3.69096e+09	0	3.69096e+09	0	13177.9	0	13177.9	0	13177.9
QAT	H	2545820	92177.6	1.48751e+08			1.40304e+09	1.12716e+09	6.9504e+10	2.75876e+08	7.06311e+10	442.751	27301.2	108.364	27744	0	27744
REU					1.36962e+10											0
ROU	UM	19588715	26948.2	2.14275e+08	9.34507e+11	47706.4	5.48102e+11	4.76403e+11	1.31824e+11	7.16991e+10	6.08227e+11	24320.3	6729.6	3660.23	31049.9	-19278.4	11771.5
RUS	UM	145293260	25926.4	1.38294e+09	1.36792e+13	94148.8	3.82469e+12	3.38497e+12	1.35424e+12	4.39717e+11	4.73921e+12	23297.5	9320.75	3026.41	32618.3	-20846.8	11771.5
RWA	L	12202060	1934.97	1.02272e+07	1.32221e+10	1083.59	1.07109e+09	8.22978e+08	4.26526e+09	2.48112e+08	5.08823e+09	67.4458	349.552	20.3336	416.998	7121.35	7538.35
SAS		1572520427														0
SAU	H	30977355	45795.5	6.40323e+08			3.08741e+11	2.8956e+11	3.00702e+11	1.91819e+10	5.90262e+11	9347.46	9707.17	619.222	19054.6	0	19054.6
SDN	LM	42714306	4613.95	1.20908e+08	3.97559e+11	9307.39	5.8555e+11	5.81218e+11	2.55078e+10	4.33151e+09	6.06726e+11	13607.1	597.173	101.407	14204.3	0	14204.3
SEN	L	15475002	3259.19	2.27453e+07	9.34474e+10	6038.6	6.274e+10	3.26613e+10	8.33456e+09	3.00787e+10	4.09958e+10	2110.58	538.582	1943.7	2649.16	4889.19	7538.35
SGP	H	5612253	95310.3	2.5524e+08	530259	0.0944823	0	0	1.10536e+11	0	1.10536e+11	0	19695.4	0	19695.4	-7923.9	11771.5
SLB	LM	685672	2625.09													0
SLE	L	7379299	1593.48	4.61601e+06	2.78908e+10	3779.6	3.54878e+09	2.96749e+09	2.94357e+09	5.81286e+08	5.91106e+09	402.138	398.895	78.7725	801.033	6737.32	7538.35
SLV	LM	6213533	8617.92	2.72853e+07	1.68644e+10	2714.13	1.97039e+10	7.29838e+09	1.41075e+10	1.24055e+10	2.14059e+10	1174.59	2270.45	1996.53	3445.04	4093.31	7538.35
SMR	H	33825	58201.5	2.20399e+06			0	0	2.9201e+09	0	2.9201e+09	0	86329.6	0	86329.6	0	86329.6
SOM	L	14916629	1059.14	1.17565e+06	1.6063e+10	1076.85	3.98499e+10	3.96564e+10	6.70931e+07	1.93547e+08	3.97235e+10	2658.54	4.49787	12.9753	2663.03	4875.32	7538.35
SRB	UM	7020858	16614	6.18875e+07	8.46338e+11	120546	1.96744e+11	1.8049e+11	6.15333e+10	1.62544e+10	2.42023e+11	25707.7	8764.36	2315.16	34472.1	0	34472.1
SSA		971179323														0
SSD	L	10259154	1590	8.33099e+06	1.56021e+11	15207.9	0	0	7.13345e+08	0	7.13345e+08	0	69.5325	0	69.5325	7468.82	7538.35
SSF		1080941647														0
SST		18865506														0
STP	LM	206970	3934.89	455340	3.67513e+08	1775.68	0	0	4.24586e+08	0	4.24586e+08	0	2051.44	0	2051.44	5486.91	7538.35
SUR	UM	593713	17753.1	3.06744e+06	1.19671e+11	201564	6.0489e+08	1.82292e+08	1.66435e+09	4.22598e+08	1.84665e+09	307.037	2803.3	711.789	3110.33	4428.02	7538.35
SVK	H	5439232	30061.6	9.42856e+07	8.3181e+10	15292.8	1.54301e+11	9.01018e+10	9.82919e+10	6.4199e+10	1.88394e+11	16565.2	18070.9	11802.9	34636.1	-22864.6	11771.5
SVN	H	2066388	36507.6	4.40867e+07	5.89067e+10	28507.1	5.71294e+10	4.15078e+10	3.71864e+10	1.56216e+10	7.86942e+10	20087.1	17995.9	7559.86	38083	-26311.5	11771.5
SWE	H	10057698	51948	5.11806e+08	3.13959e+11	31215.8	4.11278e+11	2.53698e+11	2.70213e+11	1.5758e+11	5.23911e+11	25224.3	26866.3	15667.6	52090.5	-40319	11771.5
SWZ	LM	1158195	8213.92	3.36396e+06	7.96815e+09	6879.8	1.83164e+10	7.07337e+09	2.23675e+09	1.12431e+10	9.31011e+09	6107.23	1931.23	9707.42	8038.47	0	8038.47
SXM	H	38996														0
SYC	H	95843	28116.7	1.37239e+06			0	0	9.80268e+08	0	9.80268e+08	0	10227.9	0	10227.9	0	10227.9
SYR	L	19224668	4189	1.37032e+07	3.21398e+10	1671.8	2.58829e+11	1.71168e+11	3.37944e+09	8.76615e+10	1.74547e+11	8903.56	175.786	4559.84	9079.35	0	9079.35
TCA	H	39913														0
TCD	L	15622759	1579.76	1.01473e+07	1.01168e+11	6475.69	8.4386e+10	4.53852e+10	4.38493e+09	3.90008e+10	4.97702e+10	2905.07	280.676	2496.41	3185.75	4352.6	7538.35
TEA		2061449949														0
TEC		458235497														0
TGO	L	8057140	1972.7	4.8761e+06	6.92759e+09	859.807	9.95545e+09	3.78422e+09	4.08119e+09	6.17123e+09	7.86541e+09	469.673	506.531	765.932	976.204	6562.15	7538.35
THA	UM	71160187	17008	3.78247e+08	1.59497e+12	22413.8	4.112e+11	2.58061e+11	1.97278e+11	1.53139e+11	4.55339e+11	3626.48	2772.31	2152.03	6398.79	1139.56	7538.35
TJK	L	9085946	3236.44	7.60869e+06	1.01207e+11	11138.9	6.04445e+10	2.5625e+10	5.26381e+09	3.48195e+10	3.08888e+10	2820.29	579.335	3832.23	3399.63	4138.72	7538.35
TKM	UM	6507061	13703.5	3.47107e+07	4.4089e+10	6775.56	1.35635e+11	5.62116e+10	3.08627e+10	7.94234e+10	8.70743e+10	8638.55	4742.96	12205.7	13381.5	0	13381.5
TLA		614776664														0
TLS	LM	1251703	3138.44													0
TMN		652312809														0
TON	UM	105356	6256.98													0
TSA		1572520427														0
TSS		1080941647														0
TTO	H	1356633	26213.9	2.10636e+07	6.80261e+08	501.433	0	0	1.29026e+10	0	1.29026e+10	0	9510.75	0	9510.75	0	9510.75
TUN	LM	11650498	10874.9	4.30234e+07	9.62877e+08	82.6469	1.43859e+11	6.56062e+10	2.56391e+10	7.82528e+10	9.12452e+10	5631.19	2200.68	6716.69	7831.88	0	7831.88
TUR	UM	80312698	27582.8	8.42286e+08	8.97111e+10	1117.02	1.95617e+12	1.35201e+12	3.27411e+11	6.04161e+11	1.67942e+12	16834.3	4076.71	7522.61	20911	0	20911
TUV	UM	10869	4208.92													0
TWN	H		44559	1.70309e+08			3.8792e+10	3.35581e+10	1.40782e+11	5.23385e+09	1.7434e+11					0
TZA	L	55652890	2458.34	5.43991e+07	1.11967e+11	2011.88	6.09795e+10	4.10198e+10	8.31669e+09	1.99597e+10	4.93365e+10	737.065	149.439	358.646	886.504	6651.85	7538.35
UGA	L	40177388	2128.4	2.80125e+07	267571834800	6659.76	9.4401e+09	4.36658e+09	5.30151e+09	5.07352e+09	9.66809e+09	108.683	131.953	126.278	240.635	7297.71	7538.35
UKR	LM	45436041	11860.6	1.16268e+08	1.31604e+11	2896.48	1.14392e+12	1.03983e+12	1.66827e+11	1.0408e+11	1.20666e+12	22885.7	3671.7	2290.7	26557.4	0	26557.4
UMC		2731375253														0
URY	H	3388438	23107	5.78363e+07	2.55785e+11	75487.6	4.70659e+11	2.80492e+11	2.43319e+10	1.90167e+11	3.04824e+11	82779.2	7180.86	56122.3	89960.1	0	89960.1
USA	H	326608609	59914.8	2.0211e+10	8.96116e+12	27437	1.7665e+13	1.24311e+13	3.65857e+12	5.23384e+12	1.60897e+13	38061.3	11201.7	16024.8	49263	-37491.5	11771.5
USR				49640.9			0	0	1.8731e+08	0						0
UZB	LM	31819178	6840.71	5.28343e+07	4.4651e+10	1403.27	4.51445e+11	3.37453e+11	5.27263e+10	1.13993e+11	3.90179e+11	10605.3	1657.06	3582.51	12262.4	0	12262.4
VCT	UM	105663	13633													0
VEN	UM	30565323	11078	3.61697e+08	2.42647e+12	79386.3	1.6593e+11	1.65429e+11	2.61038e+11	5.00724e+08	4.26467e+11	5412.32	8540.32	16.3821	13952.6	0	13952.6
VGB	H	32699		759120			0	0	4.95209e+08	0	4.95209e+08	0	15144.5	0	15144.5	0	15144.5
VIR	H	107281														0
VNM	LM	95176977	9050.69	2.6514e+08	1.46235e+11	1536.46	5.19356e+11	3.05936e+11	1.05333e+11	2.13421e+11	4.11269e+11	3214.39	1106.71	2242.36	4321.1	3217.25	7538.35
VUT	LM	278507	3031.19	667304			0	0	7.48043e+08	0	7.48043e+08	0	2685.9	0	2685.9	4852.44	7538.35
WLD		7614748582														0
WSM	UM	205415	6238.8	896124			0	0	9.1821e+08	0	9.1821e+08	0	4470.02	0	4470.02	3068.33	7538.35
XKX	LM	1791019														0
YEM	L	33090921	2456	2.94875e+07			4.22962e+10	3.98266e+10	1.00381e+10	2.46958e+09	4.98647e+10	1203.55	303.348	74.6302	1506.9	6031.45	7538.35
ZAF	UM	57635162	13950.5	3.40026e+08	1.2867e+11	2232.5	8.85655e+11	7.30698e+11	1.8543e+11	1.54957e+11	9.16128e+11	12678	3217.31	2688.59	15895.3	0	15895.3
ZMB	LM	17441320	3395.48	2.51575e+07	2.26359e+11	12978.3	4.46579e+10	1.22837e+10	2.44717e+10	3.23743e+10	3.67553e+10	704.286	1403.09	1856.18	2107.37	5430.98	7538.35
ZWE	L	14812482	2331.78	2.40836e+07	3.28943e+10	2220.71	1.05776e+11	1.0071e+11	1.2145e+10	5.06657e+09	1.12855e+11	6798.99	819.918	342.047	7618.91	0	7618.91

## Sheet: A1-Nitrogen
ISO3	Income group	Population	GDP per capita (PPP, 2017 int $)	Final demand (thousand USD)	Biocapacity (m3)	Biocapacity (m3/cap)	Production footprint (m³)	Domestic use (m3)	Imports (m3)	Exports (m³)	Consumption footprint (m3)	Domestic use (m3/cap)	Imports (m3/cap)	Exports (m³/cap)	Consumption footprint (m3/cap)	Change needed (m3/cap)	Total mod (m3/cap)
ABW	H	108735		2.49667e+06			145587600	145587600	5.50327e+08	0	6.95915e+08	1338.92	5061.18	0	6400.1	0	6400.1
AFE		640058741														0
AFG	L	35688935	2096.09	2.8317e+07	7.60658e+10	2131.35	112288129520	8.91107e+10	5.04885e+09	2.31774e+10	9.41596e+10	2496.87	141.468	649.429	2638.34	0	2638.34
AFW		440882906														0
AGO	LM	30234839	7216.06	1.10371e+08	4.21015e+10	1392.48	7.46087e+10	7.01491e+10	1.27048e+10	4.45955e+09	8.28539e+10	2320.14	420.203	147.497	2740.35	0	2740.35
ALB	UM	2873457	12773.3	1.41766e+07	17648888800	6142.04	1.39982e+10	6.50862e+09	1.96186e+09	7.48958e+09	8.47049e+09	2265.08	682.754	2606.47	2947.84	0	2947.84
AND	H	73763		2.82629e+06			8.09805e+07	8.09662e+07	2.97399e+08	14227.6	3.78366e+08	1097.65	4031.82	0.192883	5129.48	0	5129.48
ANT				-171000			4.6716e+08	4.6716e+08	184734	-2.41943						0
ARB		428315886														0
ARE	H	9223225	71182.4	2.67948e+08			2.73351e+10	1.98515e+10	4.85653e+10	7.4836e+09	6.84169e+10	2152.34	5265.55	811.387	7417.89	0	7417.89
ARG	H	44288894	23597.1	6.37765e+08	3.13456e+12	70775.4	6.40734e+11	4.9837e+11	2.73846e+10	1.42364e+11	5.25754e+11	11252.7	618.317	3214.44	11871	0	11871
ARM	UM	2979400	12509.6	1.27971e+07	4.03892e+08	135.562	7.52508e+09	5.92082e+09	1.49496e+09	1.60426e+09	7.41578e+09	1987.25	501.764	538.449	2489.02	0	2489.02
ASM	UM	51586			341640	6.62273										0
ATG	H	90468	20777.9	1.30073e+06			3.08454e+08	2.49416e+08	3.49867e+08	5.90376e+07	5.99283e+08	2756.95	3867.3	652.58	6624.26	0	6624.26
AUS	H	24592588	48400.2	1.38225e+09	3.28391e+11	13353.2	5.98332e+11	3.58711e+11	4.52152e+10	2.39621e+11	4.03926e+11	14586.2	1838.57	9743.61	16424.7	-12677.3	3747.42
AUT	H	8797566	54173	3.93906e+08	5.9341e+11	67451.6	4.46624e+10	2.85881e+10	3.81359e+10	1.60743e+10	6.6724e+10	3249.55	4334.82	1827.13	7584.37	-3836.95	3747.42
AZE	UM	9854033	14121.4	3.5467e+07	1.46431e+10	1486.01	4.11683e+10	1.90482e+10	3.77836e+09	2.21201e+10	2.28266e+10	1933.04	383.432	2244.77	2316.47	295.918	2612.39
BDI	L	11506762	750.788	2.51131e+06	2.18285e+10	1897.02	2.46218e+10	2.32798e+10	6.23114e+08	1.34197e+09	2.39029e+10	2023.14	54.152	116.624	2077.29	535.098	2612.39
BEL	H	11375158	50442.3	4.88195e+08	3.18655e+10	2801.32	4.70622e+10	2.66257e+10	7.60546e+10	2.04365e+10	1.0268e+11	2340.68	6686.02	1796.59	9026.71	-5279.29	3747.42
BEN	L	12039780	2933.84	9.71682e+06	5.54242e+10	4603.42	3.87979e+10	2.68801e+10	1.53422e+09	1.19178e+10	2.84143e+10	2232.61	127.429	989.869	2360.04	252.355	2612.39
BFA	L	19894407	1978.15	1.49578e+07	1.9936e+10	1002.09	1.33834e+11	6.96673e+10	6.9014e+09	6.41668e+10	7.65687e+10	3501.85	346.902	3225.37	3848.76	0	3848.76
BGD	LM	162186147	4830.78	2.48355e+08	1.27993e+12	7891.71	5.52445e+11	4.33519e+11	1.35963e+10	1.18926e+11	4.47116e+11	2672.97	83.8313	733.266	2756.8	0	2756.8
BGR	UM	6803468	21473.8	5.16843e+07	9.57645e+11	140758	6.89868e+10	1.38245e+10	7.39324e+09	5.51623e+10	2.12178e+10	2031.98	1086.69	8107.96	3118.67	0	3118.67
BHR	H	1501116	48929.4	3.07201e+07			2.52232e+09	2.4036e+09	4.92413e+09	1.18726e+08	7.32772e+09	1601.21	3280.31	79.0915	4881.52	0	4881.52
BHS	H	390485	34357.3	1.20081e+07			9.23725e+08	7.02524e+08	1.44133e+09	2.21202e+08	2.14386e+09	1799.1	3691.14	566.479	5490.24	0	5490.24
BIH	UM	3428682	13402.4	1.91187e+07	6.57062e+09	1916.37	1.32964e+10	8.15624e+09	2.78322e+09	5.14013e+09	1.09395e+10	2378.83	811.745	1499.16	3190.57	0	3190.57
BLR	UM	9458989	18356.1	3.25848e+07	5.58161e+10	5900.86	1.1201e+11	1.88775e+10	2.16554e+10	9.31325e+10	4.05329e+10	1995.72	2289.4	9845.92	4285.12	0	4285.12
BLZ	UM	373202	8873.75	1.73615e+06			1.96659e+09	7.96896e+08	3.29616e+08	1.16969e+09	1.12651e+09	2135.29	883.211	3134.2	3018.51	0	3018.51
BMU	H	63578		5.38289e+06			6.65409e+07	5.55966e+07	5.21681e+08	1.09443e+07	5.77277e+08	874.463	8205.37	172.139	9079.83	0	9079.83
BOL	LM	11344587	8244.93	3.95471e+07	9.94016e+10	8762.02	1.1551e+11	1.04017e+11	7.9722e+09	1.14929e+10	1.11989e+11	9168.84	702.732	1013.07	9871.57	0	9871.57
BRA	UM	204703445	14477.9	1.98362e+09	4.16333e+13	203383	2557705680000	2.29065e+12	1.17834e+11	2.67051e+11	2.40849e+12	11190.1	575.634	1304.57	11765.7	0	11765.7
BRB	H	280171	16199	4.5437e+06			5.4213e+08	3.50261e+08	7.09205e+08	1.91868e+08	1.05947e+09	1250.17	2531.33	684.826	3781.5	0	3781.5
BRN	H	432772	60173.1	9.85035e+06			1.55635e+09	1.31169e+09	9.19673e+08	2.44656e+08	2.23136e+09	3030.91	2125.07	565.323	5155.98	0	5155.98
BTN	LM	754335	10986.9	2.76484e+06			2.5849e+09	2.39373e+09	7.26702e+08	1.91172e+08	3.12043e+09	3173.3	963.368	253.431	4136.67	0	4136.67
BWA	UM	2266747	14656.8	1.5899e+07	1.31833e+10	5815.94	2.17364e+10	1.14943e+10	1.62825e+09	1.02421e+10	1.31226e+10	5070.84	718.321	4518.4	5789.16	0	5789.16
CAF	L	4793511	839.6	2.02598e+06	1.89593e+11	39552.1	3.86918e+10	3.16752e+10	3.37354e+08	7.01664e+09	3.20125e+10	6607.92	70.3772	1463.78	6678.3	0	6678.3
CAN	H	36545075	48317.2	1.6111e+09	6.78174e+12	185572	4.41445e+11	2.24994e+11	1.66411e+11	2.16451e+11	3.91406e+11	6156.63	4553.59	5922.84	10710.2	-6962.8	3747.42
CEB		102337501														0
CHE	H	8451840	69103.6	5.97725e+08	2.5761e+11	30479.7	2.11843e+10	1.75753e+10	6.75039e+10	3.609e+09	8.50792e+10	2079.46	7986.89	427.008	10066.4	-6318.93	3747.42
CHI	H	164319														0
CHL	H	18558868	24546.9	2.68583e+08	1.99261e+11	10736.7	9.0825e+10	5.20277e+10	2.09513e+10	3.87973e+10	7.29789e+10	2803.38	1128.91	2090.5	3932.3	0	3932.3
CHN	UM	1396215000	14243.5	1.14168e+10	2.78733e+12	1996.35	9.05161e+12	8.52833e+12	7.30042e+11	5.2328e+11	9.25837e+12	6108.18	522.872	374.785	6631.05	0	6631.05
CIV	LM	26733372	4750.94	3.35565e+07	1.08109e+11	4043.97	6.42294e+10	3.06428e+10	4.48876e+09	3.35866e+10	3.51316e+10	1146.24	167.908	1256.36	1314.15	1298.24	2612.39
CMR	LM	24128601	3691.09	3.22636e+07	2.77371e+11	11495.5	9.5244e+10	5.8751e+10	2.92115e+09	3.6493e+10	6.16721e+10	2434.91	121.066	1512.44	2555.98	56.415	2612.39
COD	L	87083398	1023.54	3.57235e+07	1.2363e+12	14196.7	1.24173e+11	1.10087e+11	8.87389e+09	1.40861e+10	1.18961e+11	1264.16	101.901	161.754	1366.06	1246.33	2612.39
COG	LM	5351011	4073.93	9.44885e+06	1.45515e+12	271939	8.67171e+09	7.21114e+09	1.66849e+09	1.46057e+09	8.87963e+09	1347.62	311.808	272.951	1659.43	952.961	2612.39
COL	UM	48131078	14334.9	3.25999e+08	7.17221e+11	14901.4	2.71744e+11	2.19094e+11	4.35463e+10	5.26494e+10	2.62641e+11	4552.04	904.744	1093.88	5456.78	0	5456.78
COM	L	756669	3240.18													0
CPV	LM	512893	6320.34	1.50369e+06			2.24485e+09	1.74954e+09	4.69115e+08	4.95309e+08	2.21866e+09	3411.13	914.644	965.716	4325.77	0	4325.77
CRI	UM	4913177	20168.2	5.43295e+07	7.37294e+10	15006.5	2.23948e+10	9.62824e+09	7.70771e+09	1.27666e+10	1.7336e+10	1959.68	1568.78	2598.44	3528.46	0	3528.46
CSS		4366140														0
CUB	UM	11247829	21016	8.88958e+07	2.66548e+09	236.977	6.63496e+10	4.4626e+10	2.70999e+09	2.17236e+10	4.7336e+10	3967.52	240.935	1931.36	4208.45	0	4208.45
CUW	H	160175														0
CYM	H	64535		4.9647e+06			8.63954e+07	8.2399e+07	6.09092e+08	3.99634e+06	6.91491e+08	1276.81	9438.16	61.9252	10715	0	10715
CYP	H	1254275	38422	2.18236e+07	8.19573e+07	65.3423	3.75351e+09	2.85283e+09	3.92314e+09	9.00675e+08	6.77597e+09	2274.49	3127.81	718.084	5402.3	-1654.88	3747.42
CZE	H	10594438	38824.9	1.42139e+08	2.90381e+10	2740.88	5.71513e+10	3.51951e+10	2.90587e+10	2.19561e+10	6.42538e+10	3322.04	2742.83	2072.42	6064.87	-2317.45	3747.42
DEU	H	82657002	53071.5	3.24085e+09	1.10102e+12	13320.4	3.58117e+11	2.54367e+11	3.86802e+11	1.0375e+11	6.41169e+11	3077.38	4679.6	1255.19	7756.98	-4009.56	3747.42
DJI	LM	1054841	4451.68	2.35001e+06			4.657e+09	1.60826e+09	9.37473e+08	3.04874e+09	2.54573e+09	1524.65	888.734	2890.24	2413.38	199.01	2612.39
DMA	UM	68496	11511.6													0
DNK	H	5764980	55356.7	2.93781e+08	6.66469e+09	1156.06	6.2447e+10	1.86111e+10	2.17544e+10	4.38359e+10	4.03655e+10	3228.3	3773.54	7603.83	7001.85	-3254.43	3747.42
DOM	UM	10666843	16524.5	7.33187e+07	6.54632e+09	613.707	4.57145e+10	2.49771e+10	6.34598e+09	2.07374e+10	3.13231e+10	2341.56	594.926	1944.1	2936.49	0	2936.49
DZA	UM	41689299	11809.5	1.78171e+08	1.96224e+09	47.0683	145207144000	1.41136e+11	1.3399e+10	4.07147e+09	1.54535e+11	3385.42	321.402	97.6622	3706.82	0	3706.82
EAP		2087238522														0
EAR		3274060446														0
EAS		2333475520														0
ECA		244533821														0
ECS		915290996														0
ECU	UM	16759519	11679.4	1.0164e+08	9.62752e+10	5744.51	7.96718e+10	6.62898e+10	8.66303e+09	1.3382e+10	7.49529e+10	3955.35	516.902	798.469	4472.26	0	4472.26
EGY	LM	103696057	10435.9	2.15257e+08	2.90646e+11	2802.86	4.01993e+11	3.29867e+11	1.78368e+10	7.21254e+10	3.47704e+11	3181.1	172.01	695.546	3353.11	0	3353.11
EMU		344810179														0
ERI	L	3150347	1585	5.6753e+06			2.80294e+10	2.54699e+10	4.834e+08	2.55949e+09	2.59533e+10	8084.78	153.443	812.446	8238.23	0	8238.23
ESP	H	46571232	39528.9	1.24572e+09	1.6952e+11	3640.03	3.94065e+11	2.46823e+11	1.82286e+11	1.47242e+11	4.29108e+11	5299.9	3914.13	3161.66	9214.02	-5466.6	3747.42
EST	H	1317384	33821.9	2.55667e+07	3.56629e+10	27071	8.81826e+09	4.24538e+09	3.90955e+09	4.57288e+09	8.15493e+09	3222.58	2967.66	3471.18	6190.25	-2442.83	3747.42
ETH	L	109666481	1987.97	2.01657e+07	1.55557e+11	1418.46	5.64199e+11	1.67566e+11	7.20382e+09	3.96633e+11	1.74769e+11	1527.96	65.6885	3616.72	1593.65	1018.75	2612.39
EUU		445321060														0
FCS		931222867														0
FIN	H	5508214	47570.1	2.48015e+08	2.45799e+11	44624.1	2.93867e+10	1.57408e+10	1.85503e+10	1.36459e+10	3.42911e+10	2857.69	3367.75	2477.37	6225.44	-2478.02	3747.42
FJI	UM	918759	12822	4.45456e+06	3.80275e+09	4139.01	5.98889e+09	2.51395e+09	7.45969e+08	3.47494e+09	3.25992e+09	2736.24	811.931	3782.21	3548.17	0	3548.17
FRA	H	66918020	44577.1	2.55492e+09	3.23274e+11	4830.89	5.61168e+11	4.00332e+11	2.67638e+11	1.60836e+11	6.6797e+11	5982.42	3999.49	2403.49	9981.92	-6234.5	3747.42
FRO	H	50180														0
FSM	LM	109481	3522.29		7958460	72.6926										0
GAB	UM	2156900	14478.1	1.00586e+07	5.54582e+11	257120	5.14055e+09	3.48999e+09	1.36832e+09	1.65056e+09	4.85831e+09	1618.06	634.394	765.248	2252.45	359.939	2612.39
GBR	H	65966000	46372.4	2.69118e+09	8.64496e+10	1310.52	3.70175e+11	3.20823e+11	2.15104e+11	4.9352e+10	5.35927e+11	4863.46	3260.82	748.143	8124.29	-4376.87	3747.42
GEO	LM	3728004	13589.7	1.83482e+07	2.48949e+10	6677.8	1.08933e+10	7.54941e+09	4.83449e+09	3.34386e+09	1.23839e+10	2025.05	1296.8	896.958	3321.86	0	3321.86
GHA	LM	30008354	4929.57	5.61052e+07	7.53876e+10	2512.22	8.08944e+10	3.93935e+10	5.66549e+09	4.15008e+10	4.5059e+10	1312.75	188.797	1382.98	1501.55	1110.84	2612.39
GIB	H	34245														0
GIN	L	12385659	2383.58	9.34428e+06	1.14487e+11	9243.52	5.83077e+10	3.36625e+10	1.59603e+09	2.46452e+10	3.52585e+10	2717.86	128.861	1989.82	2846.72	0	2846.72
GLP					149986384											0
GMB	L	2342189	1927.04	1.70739e+06			7.49072e+09	6.69612e+09	3.11711e+08	7.94604e+08	7.00783e+09	2858.91	133.086	339.257	2992	0	2992
GNB	L	1877072	1872.31		1.87516e+10	9989.8										0
GNQ	UM	1562396	19617.8													0
GRC	H	10754679	28604.9	2.06818e+08	1.32983e+10	1236.52	8.32982e+10	5.40289e+10	2.79554e+10	2.92692e+10	8.19843e+10	5023.76	2599.37	2721.53	7623.13	-3875.71	3747.42
GRD	UM	115438	14870													0
GRL	H	56172		2.23416e+06			7.83277e+07	7.20188e+07	2.27799e+08	6.30891e+06	2.99818e+08	1282.11	4055.38	112.314	5337.49	0	5337.49
GTM	UM	16567357	8322.22	7.77879e+07	3.76464e+10	2272.32	6.41459e+10	3.58727e+10	8.10224e+09	2.82732e+10	4.39749e+10	2165.26	489.048	1706.56	2654.31	0	2654.31
GUF					9.12891e+10											0
GUM	H	163490			6562992	40.1431										0
GUY	UM	768479	12193.6	2.95926e+07	1.32553e+11	172487	5.77331e+09	5.76567e+09	1.41497e+08	7.63744e+06	5.90717e+09	7502.71	184.126	9.93838	7686.83	0	7686.83
HIC		1380319892														0
HKG	H	7393200		3.83997e+08	4.58292e+06	0.619884	9.08658e+09	9.00121e+09	1.04089e+11	8.53706e+07	1.13091e+11	1217.5	14079.1	11.5472	15296.6	0	15296.6
HND	LM	9588137	5447.7	2.56293e+07	2.93728e+09	306.345	3.50215e+10	1.66646e+10	5.41332e+09	1.83569e+10	2.20779e+10	1738.05	564.585	1914.55	2302.63	309.759	2612.39
HPC		779389964														0
HRV	H	4041407	27211.8	5.18563e+07	16340120856	4043.18	1.45264e+10	8.27367e+09	6.54121e+09	6.25274e+09	1.48149e+10	2047.22	1618.55	1547.17	3665.77	0	3665.77
HTI	L	10817754	3187.79	1.03483e+07			3.34586e+10	2.5232e+10	1.35761e+09	8.22657e+09	2.65897e+10	2332.47	125.499	760.47	2457.96	154.426	2612.39
HUN	H	9726756	29501.1	1.28785e+08	7.00643e+11	72032.5	8.91798e+10	3.74517e+10	1.20191e+10	5.17281e+10	4.94708e+10	3850.38	1235.67	5318.12	5086.05	-1338.63	3747.42
IBD		4765998583														0
IBT		6440236993														0
IDA		1674238410														0
IDB		590024074														0
IDN	LM	267346658	10941.9	9.66417e+08	3.93119e+10	147.045	9.4108e+11	8.34889e+11	5.79668e+10	1.0619e+11	8.92856e+11	3122.87	216.822	397.201	3339.69	0	3339.69
IDX		1084214336														0
IMN	H	83609														0
IND	LM	1359657400	6112.07	2.52209e+09	1.87719e+12	1380.63	5.28291e+12	4.9872e+12	2.18696e+11	2.95703e+11	5.2059e+12	3667.99	160.846	217.484	3828.83	0	3828.83
INX																0
IRL	H	4827445	77749.2	2.58428e+08	4.03937e+10	8367.5	6.03762e+10	9.61606e+09	2.36569e+10	5.07601e+10	3.32729e+10	1991.96	4900.5	10514.9	6892.45	-3145.04	3747.42
IRN	UM	85026754	15163.3	4.26327e+08	5.01215e+10	589.479	5.07054e+11	4.64472e+11	3.26277e+10	4.25817e+10	4.971e+11	5462.66	383.734	500.804	5846.39	0	5846.39
IRQ	UM	39337353	9976.85	1.62521e+08	97013496000	2466.19	8.8533e+10	8.58828e+10	1.42144e+10	2.65023e+09	1.00097e+11	2183.24	361.347	67.3719	2544.59	67.8056	2612.39
ISL	H	343400	55638.5	2.10664e+07	6.25381e+10	182114	2.06523e+09	5.78671e+08	1.81838e+09	1.48655e+09	2.39705e+09	1685.12	5295.21	4328.93	6980.34	-3232.92	3747.42
ISR	H	8713300	39121.3	3.42809e+08	1.65505e+09	189.945	1.70098e+10	1.52113e+10	1.01519e+11	1.79848e+09	1.1673e+11	1745.76	11651	206.406	13396.8	-9649.37	3747.42
ITA	H	60002252	41581.1	1.85219e+09	1.81395e+11	3023.14	2.92493e+11	2.38727e+11	2.2536e+11	5.37668e+10	4.64086e+11	3978.63	3755.85	896.08	7734.48	-3987.06	3747.42
JAM	UM	2815764	9984.58	1.65937e+07	3.04902e+09	1082.84	8.41843e+09	5.36001e+09	2.11672e+09	3.05842e+09	7.47673e+09	1903.57	751.738	1086.18	2655.31	0	2655.31
JOR	UM	10234226	9629.1	4.81345e+07	4.43896e+08	43.3737	1.82074e+10	1.38555e+10	9.00797e+09	4.35191e+09	2.28635e+10	1353.84	880.181	425.231	2234.02	0	2234.02
JPN	H	126972000	41444.2	4.5499e+09	5.22297e+11	4113.48	2.59787e+11	2.51888e+11	4.79256e+11	7.89968e+09	7.31144e+11	1983.8	3774.5	62.2159	5758.31	-2010.89	3747.42
KAZ	UM	18651931	24863	1.41691e+08	2.08605e+11	11184.1	1.6271e+11	1.43863e+11	1.84897e+10	1.88475e+10	1.62352e+11	7713.02	991.302	1010.49	8704.32	0	8704.32
KEN	LM	49197766	4312.91	8.42449e+07	5.49268e+09	111.645	3.07817e+11	2.72963e+11	3.47087e+10	3.48537e+10	3.07672e+11	5548.29	705.494	708.441	6253.78	0	6253.78
KGZ	LM	6306696	5046.69	9.88063e+06	5.49133e+10	8707.15	3.04257e+10	2.79256e+10	2.42903e+09	2.50011e+09	3.03546e+10	4427.93	385.151	396.421	4813.08	0	4813.08
KHM	LM	16073372	3972.72	2.22009e+07	2.09298e+12	130214	5.81951e+10	2.70741e+10	3.12309e+09	3.11209e+10	3.01972e+10	1684.41	194.302	1936.18	1878.71	733.679	2612.39
KIR	LM	120275	1962.32													0
KNA	H	47050	29333.4													0
KOR	H	51361911	40957.4	1.49666e+09	5.07881e+10	988.828	8.19845e+10	7.9737e+10	1.72853e+11	2.24749e+09	2.5259e+11	1552.45	3365.39	43.7579	4917.84	-1170.42	3747.42
KWT	H	4154812	50007.3	1.01741e+08			9.70627e+09	9.40407e+09	4.0201e+10	3.02201e+08	4.96051e+10	2263.42	9675.77	72.7352	11939.2	-8191.76	3747.42
LAC		561957179														0
LAO	LM	7018147	7211.26	1.70701e+07	1.00121e+12	142661	3.11645e+10	1.16307e+10	2.09655e+09	1.95338e+10	1.37273e+10	1657.23	298.733	2783.33	1955.97	656.425	2612.39
LBN	UM	6160128	17808.1	6.19899e+07			1.23219e+10	9.09082e+09	1.08526e+10	3.23112e+09	1.99434e+10	1475.75	1761.74	524.521	3237.49	0	3237.49
LBR	L	4848925	1533.41	1.47362e+06	9.42518e+10	19437.7	8.16279e+09	5.7433e+09	7.8001e+08	2.41949e+09	6.52331e+09	1184.45	160.862	498.974	1345.31	1267.08	2612.39
LBY	UM	6738770	24212.9	2.50125e+07			3.23656e+10	3.07903e+10	5.7507e+09	1.5753e+09	3.6541e+10	4569.13	853.376	233.766	5422.5	0	5422.5
LCA	UM	176342	15247.5													0
LCN		630414986														0
LDC		1008993468														0
LIC		514890519														0
LIE	H	37962		5.11781e+06			8.73333e+07	5.83802e+07	1.40241e+09	2.89531e+07	1.46079e+09	1537.86	36942.5	762.687	38480.3	0	38480.3
LKA	LM	21453000	13584.2	8.93941e+07	2.5688e+10	1197.41	4.40668e+10	3.2805e+10	1.85103e+10	1.12618e+10	5.13153e+10	1529.16	862.83	524.953	2391.99	220.406	2612.39
LMC		2847931114														0
LMY		6094196886														0
LSO	LM	2157110	2571.69	3.18285e+06	1.15913e+10	5373.52	1.17624e+10	9.42171e+09	1.07935e+09	2.34066e+09	1.05011e+10	4367.75	500.367	1085.09	4868.11	0	4868.11
LTE		2286095306														0
LTU	H	2842639	33761.9	4.70335e+07	7.09228e+10	24949.6	3.3824e+10	1.6822e+10	8.68191e+09	1.7002e+10	2.55039e+10	5917.75	3054.17	5981.05	8971.92	-5224.5	3747.42
LUX	H	596336	114986	6.21585e+07	3.62313e+09	6075.65	2.54204e+09	8.04535e+08	8.1478e+09	1.73751e+09	8.95233e+09	1349.13	13663.1	2913.64	15012.2	-11264.8	3747.42
LVA	H	1942248	28673.6	3.012e+07	1.14634e+11	59021.2	1.51442e+10	7.45457e+09	7.06894e+09	7.68966e+09	1.45235e+10	3838.11	3639.56	3959.15	7477.68	-3730.26	3747.42
MAC	H	648400		4.92409e+07			5.28926e+08	5.17636e+08	4.02216e+09	1.12909e+07	4.5398e+09	798.327	6203.21	17.4135	7001.54	0	7001.54
MAF	H	36837														0
MAR	LM	35446392	7921.62	1.12337e+08	9.86421e+09	278.285	1.70151e+11	9.8361e+10	1.23268e+10	7.17904e+10	1.10688e+11	2774.92	347.759	2025.32	3122.68	0	3122.68
MCO	H	37678		6.42849e+06			48616800	48616800	9.76682e+08	0	1.0253e+09	1290.32	25921.8	0	27212.1	0	27212.1
MDA	LM	2755189	11651.2	163771	9.46218e+09	3434.31	1.46309e+10	4.14615e+09	1.94114e+08	1.04848e+10	4.34026e+09	1504.85	70.4539	3805.47	1575.3	1037.09	2612.39
MDG	L	26788375	1548.16	1.18818e+07	1.77751e+11	6635.38	1.02276e+11	3.62065e+10	1.64641e+09	6.60695e+10	3.78529e+10	1351.57	61.4598	2466.35	1413.03	1199.36	2612.39
MDV	UM	458287	18973.6	4.76728e+06			8.02264e+08	7.94924e+08	1.05501e+09	7.33983e+06	1.84994e+09	1734.55	2302.08	16.0158	4036.63	0	4036.63
MEA		718887744														0
MEX	UM	123400057	20032.4	1.13688e+09	5.85861e+11	4747.65	6.68835e+11	6.02743e+11	2.03597e+11	6.60929e+10	8.0634e+11	4884.46	1649.9	535.599	6534.35	0	6534.35
MHL	UM	46529	4634.94													0
MIC		5579306367														0
MKD	UM	1898657	15709.3	1.16402e+07	1.80701e+09	951.732	6.9561e+09	5.36341e+09	2.51989e+09	1.59269e+09	7.88331e+09	2824.85	1327.2	838.848	4152.04	0	4152.04
MLI	L	19813011	2153.85	1.69363e+07	5.10995e+11	25790.9	1.49013e+11	9.90886e+10	2.18949e+09	4.99245e+10	1.01278e+11	5001.19	110.508	2519.79	5111.7	0	5111.7
MLT	H	467106	43516.6	1.03043e+07			9.5571e+08	6.47135e+08	3.18935e+09	3.08575e+08	3.83648e+09	1385.41	6827.88	660.611	8213.3	-4465.88	3747.42
MMR	LM	51894938	4312.95	6.73813e+07	1.45814e+12	28098	2.58499e+11	1.89463e+11	1.15498e+09	6.90363e+10	1.90618e+11	3650.9	22.2561	1330.31	3673.15	0	3673.15
MNA		656767614														0
MNE	UM	625982	19685.8	6.1494e+06			1.87772e+09	1.5516e+09	2.99546e+09	3.26127e+08	4.54706e+09	2478.66	4785.22	520.985	7263.88	0	7263.88
MNG	LM	3148917	11431.5	1.18786e+07	1.13194e+10	3594.69	7.09728e+10	2.39468e+10	2.77805e+09	4.7026e+10	2.67248e+10	7604.77	882.223	14934	8486.99	0	8486.99
MNP	H	49959														0
MOZ	L	28166393	1287.23	1.53891e+07	1.51612e+11	5382.73	6.75504e+10	3.52859e+10	2.95306e+09	3.22645e+10	3.8239e+10	1252.77	104.844	1145.5	1357.61	1254.78	2612.39
MRT	LM	4210600	5259.07	5.05199e+06	5.73544e+08	136.214	4.62589e+10	2.05948e+10	1.53966e+09	2.56642e+10	2.21345e+10	4891.18	365.662	6095.13	5256.84	0	5256.84
MTQ					8541000											0
MUS	UM	1264887	22148.6	1.25632e+07	5.05572e+08	399.698	6.03396e+09	4.45592e+09	6.51762e+09	1.57805e+09	1.09735e+10	3522.78	5152.73	1247.58	8675.51	0	8675.51
MWI	L	18039715	1454.78	6.47536e+06	7.791e+10	4318.8	5.52874e+10	3.61157e+10	1.65348e+09	1.91717e+10	3.77692e+10	2002.01	91.6576	1062.75	2093.67	518.722	2612.39
MYS	UM	32355644	25935.1	2.82054e+08	2.52617e+11	7807.49	1.37921e+11	1.20777e+11	7.83697e+10	1.71442e+10	1.99147e+11	3732.8	2422.13	529.869	6154.93	-2407.52	3747.42
NAC		363217262														0
NAM	UM	2506853	10335.3	1.45917e+07	6.08481e+10	24272.7	2.42998e+10	1.00731e+10	1.65205e+09	1.42267e+10	1.17251e+10	4018.21	659.015	5675.13	4677.22	0	4677.22
NCL	H	283546		9.83311e+06	1.27225e+09	4486.93	1.00097e+09	8.59848e+08	1.3891e+09	1.41119e+08	2.24895e+09	3032.48	4899.03	497.695	7931.51	0	7931.51
NER	L	21435446	1155.97	1.25226e+07	9.80945e+10	4576.28	1.67766e+11	1.40492e+11	5.58732e+09	2.7274e+10	1.46079e+11	6554.18	260.658	1272.38	6814.84	0	6814.84
NGA	LM	200254579	5120.01	3.61253e+08	3.51742e+11	1756.47	6.49625e+11	5.81717e+11	1.20632e+10	6.79073e+10	5.93781e+11	2904.89	60.2394	339.105	2965.13	0	2965.13
NIC	LM	6316231	5915.38	1.50232e+07	4.45116e+10	7047.18	3.74848e+10	1.45593e+10	2.14281e+09	2.29255e+10	1.67021e+10	2305.06	339.254	3629.62	2644.31	0	2644.31
NLD	H	17131296	55088.6	7.34228e+08	1.05287e+11	6145.86	6.63729e+10	2.13147e+10	1.18535e+11	4.50582e+10	1.3985e+11	1244.2	6919.22	2630.17	8163.41	-4416	3747.42
NOR	H	5276968	64050.8	3.78071e+08	1.97282e+11	37385.4	1.68416e+10	1.27165e+10	3.20147e+10	4.12512e+09	4.47312e+10	2409.8	6066.87	781.722	8476.68	-4729.26	3747.42
NPL	L	28011258	3495.53	3.23126e+07	3.1978e+11	11416.1	108540563360	9.70201e+10	3.68988e+09	1.15204e+10	1.0071e+11	3463.61	131.728	411.279	3595.34	0	3595.34
NRU	UM	11324	11746.6													0
NZL	H	4813600	42218.5	1.97337e+08	1.98887e+11	41317.7	1.6076e+11	6.99749e+10	1.32464e+10	9.07847e+10	8.32213e+10	14536.9	2751.87	18860	17288.8	-13541.4	3747.42
OED		1348127258														0
OMN	H	4537396	34218.4	6.32526e+07	1.64436e+07	3.62401	1.23154e+10	8.53741e+09	8.894e+09	3.77802e+09	1.74314e+10	1881.57	1960.16	832.641	3841.72	0	3841.72
OSS		11989367														0
PAK	LM	223273967	4891.72	3.10839e+08	2.79123e+11	1250.14	1042797300000	9.14424e+11	1.37463e+10	1.28374e+11	9.2817e+11	4095.52	61.5668	574.961	4157.09	0	4157.09
PAN	H	4098707	30526.4	5.89437e+07	3.35712e+10	8190.68	1.87598e+10	8.98628e+09	7.10399e+09	9.77349e+09	1.60903e+10	2192.47	1733.23	2384.53	3925.69	-178.276	3747.42
PER	UM	31324637	12442.7	1.98728e+08	2.52104e+10	804.809	1.59352e+11	1.26497e+11	1.98851e+10	3.28543e+10	1.46382e+11	4038.27	634.806	1048.83	4673.08	0	4673.08
PHL	LM	108119693	8001.76	3.50039e+08	5.55781e+10	514.042	2.50288e+11	2.42286e+11	3.90104e+10	8.00236e+09	2.81296e+11	2240.9	360.808	74.0139	2601.71	10.6808	2612.39
PLW	H	17812	17594.7		5.52318e+06	310.082										0
PNG	LM	9178714	3966.95	1.6522e+07	1.8683e+11	20354.7	1.58386e+10	1.05914e+10	1.74973e+09	5.24719e+09	1.23412e+10	1153.91	190.629	571.67	1344.54	1267.85	2612.39
POL	H	37974826	29958.1	4.98094e+08	1.80164e+11	4744.31	2.62317e+11	1.73649e+11	5.5006e+10	8.86682e+10	2.28655e+11	4572.73	1448.49	2334.92	6021.22	-2273.8	3747.42
PRE		920568701														0
PRI	H	3410837			4.47135e+09	1310.93										0
PRK	L	25817709	790	1.75941e+07	1.58562e+10	614.16	5.79241e+10	5.63894e+10	6.5466e+08	1.53475e+09	5.70441e+10	2184.14	25.357	59.4457	2209.49	402.898	2612.39
PRT	H	10300300	33044.7	2.16065e+08	4.60949e+10	4475.1	6.59262e+10	5.06172e+10	3.64882e+10	1.53089e+10	8.71054e+10	4914.15	3542.44	1486.26	8456.59	-4709.17	3747.42
PRY	UM	6338660	13604.2	3.71772e+07	1.78146e+11	28104.6	1.0471e+11	7.26903e+10	1.10543e+10	3.20202e+10	8.37446e+10	11467.8	1743.96	5051.57	13211.7	0	13211.7
PSE	LM	4454805		2.20194e+07			9.1373e+09	8.67778e+09	2.37227e+09	4.59523e+08	1.105e+10	1947.96	532.518	103.152	2480.48	0	2480.48
PSS		2509999														0
PST		1107161559														0
PYF	H	280087		5.6083e+06	6.29099e+08	2246.09	7.30337e+08	6.82808e+08	7.53231e+08	4.75289e+07	1.43604e+09	2437.84	2689.28	169.693	5127.12	0	5127.12
QAT	H	2545820	92177.6	1.48751e+08			4.54509e+09	4.28796e+09	1.77322e+10	2.57134e+08	2.20201e+10	1684.31	6965.2	101.002	8649.52	0	8649.52
REU					1.36962e+10											0
ROU	UM	19588715	26948.2	2.14275e+08	9.34507e+11	47706.4	2.04445e+11	1.80073e+11	3.09759e+10	2.43721e+10	2.11049e+11	9192.71	1581.31	1244.19	10774	-7026.6	3747.42
RUS	UM	145293260	25926.4	1.38294e+09	1.36792e+13	94148.8	6.28567e+11	5.73025e+11	2.63096e+11	5.55419e+10	8.36121e+11	3943.92	1810.79	382.275	5754.71	-2007.29	3747.42
RWA	L	12202060	1934.97	1.02272e+07	1.32221e+10	1083.59	3.54109e+10	3.03542e+10	2.40282e+09	5.0567e+09	3.2757e+10	2487.63	196.919	414.413	2684.55	0	2684.55
SAS		1572520427														0
SAU	H	30977355	45795.5	6.40323e+08			8.28219e+10	8.06956e+10	8.59811e+10	2.12634e+09	1.66677e+11	2604.99	2775.61	68.6417	5380.6	0	5380.6
SDN	LM	42714306	4613.95	1.20908e+08	3.97559e+11	9307.39	4.17303e+11	4.14762e+11	7.95636e+09	2.54052e+09	4.22719e+11	9710.15	186.269	59.477	9896.42	0	9896.42
SEN	L	15475002	3259.19	2.27453e+07	9.34474e+10	6038.6	6.47776e+10	4.23639e+10	2.20173e+09	2.24137e+10	4.45656e+10	2737.57	142.277	1448.38	2879.84	0	2879.84
SGP	H	5612253	95310.3	2.5524e+08	530259	0.0944823	4.43391e+09	4.06441e+09	2.90082e+10	3.69495e+08	3.30726e+10	724.203	5168.73	65.8372	5892.93	-2145.52	3747.42
SLB	LM	685672	2625.09													0
SLE	L	7379299	1593.48	4.61601e+06	2.78908e+10	3779.6	2.25015e+10	2.0004e+10	9.09331e+08	2.49749e+09	2.09133e+10	2710.83	123.227	338.445	2834.05	0	2834.05
SLV	LM	6213533	8617.92	2.72853e+07	1.68644e+10	2714.13	2.30757e+10	1.45087e+10	4.92476e+09	8.56698e+09	1.94334e+10	2335.01	792.586	1378.76	3127.6	0	3127.6
SMR	H	33825	58201.5	2.20399e+06			39161560	39161560	1.41159e+09	0	1.45075e+09	1157.77	41732.2	0	42890	0	42890
SOM	L	14916629	1059.14	1.17565e+06	1.6063e+10	1076.85	108774682800	1.08307e+11	2.51733e+07	4.67847e+08	1.08332e+11	7260.81	1.6876	31.3641	7262.5	0	7262.5
SRB	UM	7020858	16614	6.18875e+07	8.46338e+11	120546	4.13556e+10	3.85757e+10	2.27844e+10	2.77988e+09	6.13601e+10	5494.44	3245.24	395.946	8739.69	0	8739.69
SSA		971179323														0
SSD	L	10259154	1590	8.33099e+06	1.56021e+11	15207.9	1.05962e+11	9.49165e+10	2.71025e+08	1.10459e+10	9.51876e+10	9251.89	26.4179	1076.69	9278.31	0	9278.31
SSF		1080941647														0
SST		18865506														0
STP	LM	206970	3934.89	455340	3.67513e+08	1775.68	4.43766e+08	4.09095e+08	1.46818e+08	3.46716e+07	5.55913e+08	1976.59	709.371	167.52	2685.96	0	2685.96
SUR	UM	593713	17753.1	3.06744e+06	1.19671e+11	201564	1.88563e+09	1.0662e+09	5.02556e+08	8.1943e+08	1.56876e+09	1795.82	846.462	1380.18	2642.29	0	2642.29
SVK	H	5439232	30061.6	9.42856e+07	8.3181e+10	15292.8	2.64476e+10	1.6909e+10	1.82677e+10	9.53867e+09	3.51767e+10	3108.7	3358.51	1753.68	6467.21	-2719.8	3747.42
SVN	H	2066388	36507.6	4.40867e+07	5.89067e+10	28507.1	8.66561e+09	6.96623e+09	6.52606e+09	1.69938e+09	1.34923e+10	3371.21	3158.2	822.393	6529.41	-2781.99	3747.42
SWE	H	10057698	51948	5.11806e+08	3.13959e+11	31215.8	4.17188e+10	2.84835e+10	4.53929e+10	1.32353e+10	7.38764e+10	2832.01	4513.25	1315.94	7345.26	-3597.85	3747.42
SWZ	LM	1158195	8213.92	3.36396e+06	7.96815e+09	6879.8	8.79135e+09	4.34468e+09	6.1358e+08	4.44667e+09	4.95826e+09	3751.25	529.773	3839.31	4281.02	0	4281.02
SXM	H	38996														0
SYC	H	95843	28116.7	1.37239e+06			1.58368e+08	1.21775e+08	3.18323e+08	3.6593e+07	4.40098e+08	1270.57	3321.3	381.802	4591.86	-844.445	3747.42
SYR	L	19224668	4189	1.37032e+07	3.21398e+10	1671.8	9.21292e+10	7.45916e+10	8.42865e+08	1.75377e+10	7.54344e+10	3879.99	43.8429	912.248	3923.84	0	3923.84
TCA	H	39913														0
TCD	L	15622759	1579.76	1.01473e+07	1.01168e+11	6475.69	8.80984e+10	5.51528e+10	1.57001e+09	3.29456e+10	5.67228e+10	3530.29	100.495	2108.82	3630.78	0	3630.78
TEA		2061449949														0
TEC		458235497														0
TGO	L	8057140	1972.7	4.8761e+06	6.92759e+09	859.807	2.39031e+10	1.40355e+10	2.33881e+09	9.86763e+09	1.63743e+10	1741.99	290.278	1224.71	2032.27	580.123	2612.39
THA	UM	71160187	17008	3.78247e+08	1.59497e+12	22413.8	3.64779e+11	2.61579e+11	4.94683e+10	1.032e+11	3.11047e+11	3675.91	695.168	1450.25	4371.08	0	4371.08
TJK	L	9085946	3236.44	7.60869e+06	1.01207e+11	11138.9	2.98123e+10	1.74734e+10	1.3026e+09	1.23389e+10	1.8776e+10	1923.13	143.364	1358.02	2066.49	545.901	2612.39
TKM	UM	6507061	13703.5	3.47107e+07	4.4089e+10	6775.56	5.56939e+10	2.88971e+10	7.20396e+09	2.67968e+10	3.6101e+10	4440.88	1107.1	4118.11	5547.98	0	5547.98
TLA		614776664														0
TLS	LM	1251703	3138.44													0
TMN		652312809														0
TON	UM	105356	6256.98													0
TSA		1572520427														0
TSS		1080941647														0
TTO	H	1356633	26213.9	2.10636e+07	6.80261e+08	501.433	2.73301e+09	2.31748e+09	2.92488e+09	4.15531e+08	5.24235e+09	1708.26	2155.98	306.296	3864.24	-116.819	3747.42
TUN	LM	11650498	10874.9	4.30234e+07	9.62877e+08	82.6469	5.49971e+10	3.75331e+10	6.89448e+09	1.7464e+10	4.44276e+10	3221.59	591.776	1499	3813.36	0	3813.36
TUR	UM	80312698	27582.8	8.42286e+08	8.97111e+10	1117.02	3.99917e+11	3.01559e+11	8.28995e+10	9.83573e+10	3.84459e+11	3754.81	1032.21	1224.68	4787.02	0	4787.02
TUV	UM	10869	4208.92													0
TWN	H		44559	1.70309e+08			3.50774e+10	3.31135e+10	2.85281e+10	1.96387e+09	6.16416e+10					0
TZA	L	55652890	2458.34	5.43991e+07	1.11967e+11	2011.88	2.43547e+11	1.82154e+11	2.68598e+09	6.1393e+10	1.8484e+11	3273.05	48.2631	1103.14	3321.31	0	3321.31
UGA	L	40177388	2128.4	2.80125e+07	267571834800	6659.76	1.64939e+11	9.80438e+10	2.33079e+09	6.68955e+10	1.00375e+11	2440.27	58.0124	1665	2498.29	114.104	2612.39
UKR	LM	45436041	11860.6	1.16268e+08	1.31604e+11	2896.48	2.31488e+11	2.14289e+11	2.96674e+10	1.71988e+10	2.43956e+11	4716.28	652.949	378.527	5369.23	0	5369.23
UMC		2731375253														0
URY	H	3388438	23107	5.78363e+07	2.55785e+11	75487.6	9.04918e+10	5.6558e+10	7.5591e+09	3.39338e+10	6.41172e+10	16691.5	2230.85	10014.6	18922.3	0	18922.3
USA	H	326608609	59914.8	2.0211e+10	8.96116e+12	27437	3.36438e+12	2.55284e+12	8.20883e+11	8.11533e+11	3.37373e+12	7816.22	2513.36	2484.73	10329.6	-6582.16	3747.42
USR				49640.9			0	0	7.58987e+07	0						0
UZB	LM	31819178	6840.71	5.28343e+07	4.4651e+10	1403.27	1.83956e+11	1.53523e+11	1.1354e+10	3.04322e+10	1.64877e+11	4824.87	356.83	956.412	5181.7	0	5181.7
VCT	UM	105663	13633													0
VEN	UM	30565323	11078	3.61697e+08	2.42647e+12	79386.3	1.53814e+11	1.5351e+11	7.13041e+10	3.03857e+08	2.24814e+11	5022.35	2332.84	9.94125	7355.19	0	7355.19
VGB	H	32699		759120			4.25454e+07	3.76343e+06	1.45867e+08	3.87819e+07	1.49631e+08	115.093	4460.9	1186.03	4576	0	4576
VIR	H	107281														0
VNM	LM	95176977	9050.69	2.6514e+08	1.46235e+11	1536.46	4.06336e+11	3.0262e+11	2.78076e+10	1.03716e+11	3.30427e+11	3179.55	292.168	1089.72	3471.71	0	3471.71
VUT	LM	278507	3031.19	667304			1.82038e+09	1.05671e+09	2.55203e+08	7.63667e+08	1.31191e+09	3794.19	916.326	2742	4710.51	0	4710.51
WLD		7614748582														0
WSM	UM	205415	6238.8	896124			8.31352e+08	7.01536e+08	2.9362e+08	1.29816e+08	9.95156e+08	3415.21	1429.4	631.97	4844.61	0	4844.61
XKX	LM	1791019														0
YEM	L	33090921	2456	2.94875e+07			7.78772e+10	7.49779e+10	2.90596e+09	2.89936e+09	7.78838e+10	2265.81	87.8175	87.618	2353.63	258.759	2612.39
ZAF	UM	57635162	13950.5	3.40026e+08	1.2867e+11	2232.5	2.98386e+11	2.62996e+11	5.16636e+10	3.53901e+10	3.14659e+11	4563.11	896.391	614.037	5459.5	0	5459.5
ZMB	LM	17441320	3395.48	2.51575e+07	2.26359e+11	12978.3	5.02041e+10	2.5451e+10	7.16157e+09	2.47531e+10	3.26126e+10	1459.24	410.609	1419.22	1869.85	742.543	2612.39
ZWE	L	14812482	2331.78	2.40836e+07	3.28943e+10	2220.71	6.02872e+10	5.81615e+10	3.81171e+09	2.12561e+09	6.19733e+10	3926.52	257.331	143.502	4183.85	0	4183.85

## Sheet: SI-A2
Green tabs correspond to SI-A2
These tabs show the data used for the calculation of the environmental extensions

## Sheet: A2-Cropland
Area Code (ISO3)	Crop	Production (t)*	Yield_W (t/wha)**	Production (wha)			References
AFG	Almonds, in shell	27291	1.35127	20196.5			*	FAOSTAT. (2026). FAOSTAT Database. https://www.fao.org/faostat/en/#data/QCL
AFG	Anise, badian, coriander, cumin, caraway, fennel and juniper berries, raw	18234.1	0.78612	23195.1			**	Global Footprint Network. (2018). National Footprint Accounts—World 2014 [Excel file].
AFG	Apples	170443	14.732	11569.6
AFG	Apricots	131816	5.3409	24680.5
AFG	Barley	94995	2.46474	38541.6
AFG	Cantaloupes and other melons	493088	22.6283	21790.7
AFG	Figs	7933.86	3.25592	2436.75
AFG	Grapes	923831	9.35482	98754.6
AFG	Linseed	20790.4	0.894832	23233.8
AFG	Maize (corn)	173912	4.98183	34909.2
AFG	Millet	4850.97	2.46474	1968.15
AFG	Mustard seed	600	0.744271	806.158
AFG	Olives	7463.04	1.41404	5277.81
AFG	Onions and shallots, dry (excluding dehydrated)	212000	16.4524	12885.7
AFG	Oranges	4649.02	15.87	292.945
AFG	Other berries and fruits of the genus vaccinium n.e.c.	21034	6.4383	3267.01
AFG	Other citrus fruit, n.e.c.	16028.2	8.436	1899.97
AFG	Other fruits, n.e.c.	62793	5.45585	11509.3
AFG	Other nuts (excluding wild edible nuts and groundnuts), in shell, n.e.c.	1622.36	1.35769	1194.94
AFG	Other pulses n.e.c.	35964.4	0.693528	51857.2
AFG	Other stimulant, spice and aromatic crops, n.e.c.	2.1	2.24648	0.934795
AFG	Other stone fruits	48136.8	6.62653	7264.25
AFG	Other vegetables, fresh n.e.c.	712124	12.6358	56357.4
AFG	Peaches and nectarines	62066	12.656	4904.09
AFG	Pears	8381.39	14.6345	572.715
AFG	Pistachios, in shell	2757.06	1.26403	2181.17
AFG	Plums and sloes	31844.3	3.98017	8000.75
AFG	Potatoes	513194	17.8256	28789.7
AFG	Rice	505100	4.04349	124917
AFG	Seed cotton, unginned	36770	1.95989	18761.2
AFG	Sesame seed	32000	0.461944	69272.5
AFG	Sugar beet	2102	53.5595	39.2461
AFG	Sugar cane	33725	61.8313	545.436
AFG	Sunflower seed	738.49	1.49408	494.277
AFG	Walnuts, in shell	7145	2.79817	2553.46
AFG	Watermelons	790008	28.8213	27410.5
AFG	Wheat	4280776	2.46474	1.73681e+06
ALB	Apples	96337.8	14.732	6539.36
ALB	Apricots	5039.63	5.3409	943.593
ALB	Barley	9035	2.46474	3665.7
ALB	Beans, dry	21200	0.781585	27124.4
ALB	Broad beans and horse beans, dry	207.95	1.72449	120.586
ALB	Broad beans and horse beans, green	138	5.62802	24.5202
ALB	Cabbages	52600	25.8212	2037.08
ALB	Cantaloupes and other melons	43653.5	22.6283	1929.15
ALB	Carrots and turnips	11973.6	30.503	392.538
ALB	Cauliflowers and broccoli	5294	16.7959	315.197
ALB	Cherries	19168.6	4.68509	4091.41
ALB	Chestnuts, in shell	6226.2	3.26757	1905.45
ALB	Chillies and peppers, green (Capsicum spp. and Pimenta spp.)	75211.1	14.641	5137.03
ALB	Cucumbers and gherkins	110210	31.707	3475.89
ALB	Dates	12977.7	5.80807	2234.42
ALB	Eggplants (aubergines)	27897.7	23.9257	1166.02
ALB	Figs	20077.4	3.25592	6166.44
ALB	Grapes	202948	9.35482	21694.5
ALB	Green garlic	14544.1	15.6636	928.531
ALB	Hop cones	1810.56	1.42143	1273.76
ALB	Leeks and other alliaceous vegetables	34392.8	14.9016	2308
ALB	Lemons and limes	3216	13.6502	235.6
ALB	Lettuce and chicory	17227.7	19.0797	902.936
ALB	Maize (corn)	381059	4.98183	76489.7
ALB	Mushrooms and truffles	100	267.226	0.374215
ALB	Oats	34068	2.46474	13822.1
ALB	Okra	8023	4.70824	1704.03
ALB	Olives	107830	1.41404	76256.7
ALB	Onions and shallots, dry (excluding dehydrated)	113736	16.4524	6913.02
ALB	Onions and shallots, green	40392.7	20.0578	2013.81
ALB	Oranges	9130.48	15.87	575.331
ALB	Other beans, green	10273.6	12.7827	803.71
ALB	Other citrus fruit, n.e.c.	12.1	8.436	1.43433
ALB	Other fruits, n.e.c.	11567.9	5.45585	2120.27
ALB	Other nuts (excluding wild edible nuts and groundnuts), in shell, n.e.c.	7720.42	1.35769	5686.43
ALB	Other pulses n.e.c.	690.61	0.693528	995.793
ALB	Other stimulant, spice and aromatic crops, n.e.c.	344.35	2.24648	153.284
ALB	Other stone fruits		6.62653
ALB	Other vegetables, fresh n.e.c.	8087	12.6358	640.005
ALB	Peaches and nectarines	18359.2	12.656	1450.63
ALB	Pears	13457.7	14.6345	919.589
ALB	Peas, green	5748.7	6.56283	875.948
ALB	Plums and sloes	42437.3	3.98017	10662.2
ALB	Potatoes	249804	17.8256	14013.8
ALB	Pumpkins, squash and gourds	13867.9	11.7861	1176.62
ALB	Quinces	4150	6.93308	598.579
ALB	Rice		4.04349
ALB	Rye	2695	2.46474	1093.42
ALB	Seed cotton, unginned	820	1.95989	418.39
ALB	Sorghum		2.46474
ALB	Sour cherries	17821.4	5.67798	3138.68
ALB	Soya beans	500	2.31084	216.372
ALB	Spinach	19967.9	22.7756	876.724
ALB	Strawberries	5089	19.3337	263.219
ALB	Sugar beet	32216.3	53.5595	601.505
ALB	Sunflower seed	1117	1.49408	747.616
ALB	Tangerines, mandarins, clementines	28674.2	11.0637	2591.74
ALB	Tomatoes	286811	31.2721	9171.47
ALB	Unmanufactured tobacco	1358	1.60637	845.383
ALB	Vetches	1945.78	1.50376	1293.95
ALB	Watermelons	252017	28.8213	8744.11
ALB	Wheat	274877	2.46474	111524
DZA	Almonds, in shell	61934	1.35127	45833.9
DZA	Apples	494239	14.732	33548.7
DZA	Apricots	256890	5.3409	48098.7
DZA	Artichokes	108560	10.8305	10023.6
DZA	Bananas	241.79	18.5703	13.0202
DZA	Barley	969696	2.46474	393427
DZA	Beans, dry	1480	0.781585	1893.59
DZA	Broad beans and horse beans, dry	46856	1.72449	27170.9
DZA	Broad beans and horse beans, green	288620	5.62802	51282.7
DZA	Cabbages	91942	25.8212	3560.71
DZA	Carrots and turnips	406374	30.503	13322.4
DZA	Cauliflowers and broccoli	175060	16.7959	10422.8
DZA	Cherries	9193	4.68509	1962.18
DZA	Chick peas, dry	29371.1	0.85568	34324.9
DZA	Chillies and peppers, dry (Capsicum spp., Pimenta spp.), raw	14839.4	1.96641	7546.46
DZA	Chillies and peppers, green (Capsicum spp. and Pimenta spp.)	614922	14.641	42000.1
DZA	Cucumbers and gherkins	171610	31.707	5412.37
DZA	Dates	1.05856e+06	5.80807	182257
DZA	Eggplants (aubergines)	155878	23.9257	6515.1
DZA	Figs	128684	3.25592	39523.1
DZA	Grapes	566579	9.35482	60565.5
DZA	Green garlic	123475	15.6636	7882.92
DZA	Groundnuts, excluding shelled	10171.3	1.4324	7100.86
DZA	Lemons and limes	77757	13.6502	5696.39
DZA	Lentils, dry	19139	1.03754	18446.6
DZA	Locust beans (carobs)	4042	2.3653	1708.87
DZA	Maize (corn)	2634	4.98183	528.721
DZA	Mushrooms and truffles	1126.55	267.226	4.21572
DZA	Oats	64018	2.46474	25973.5
DZA	Olives	684461	1.41404	484046
DZA	Onions and shallots, dry (excluding dehydrated)	1420310	16.4524	86328.5
DZA	Onions and shallots, green	350.6	20.0578	17.4795
DZA	Oranges	1013951	15.87	63891.2
DZA	Other beans, green	98003	12.7827	7666.82
DZA	Other citrus fruit, n.e.c.	591.95	8.436	70.1695
DZA	Other fruits, n.e.c.	35838	5.45585	6568.73
DZA	Other pulses n.e.c.	482	0.693528	694.997
DZA	Other stone fruits	29395	6.62653	4435.95
DZA	Other tropical fruits, n.e.c.		6.4614
DZA	Other vegetables, fresh n.e.c.	1.1423e+06	12.6358	90401.9
DZA	Peaches and nectarines	198324	12.656	15670.4
DZA	Pears	236982	14.6345	16193.4
DZA	Peas, dry	9923	1.52322	6514.49
DZA	Peas, green	131414	6.56283	20024
DZA	Plums and sloes	111797	3.98017	28088.5
DZA	Pomelos and grapefruits	1897	22.1027	85.8266
DZA	Potatoes	4.6064e+06	17.8256	258415
DZA	Pumpkins, squash and gourds	307861	11.7861	26120.6
DZA	Quinces	12400	6.93308	1788.53
DZA	Rape or colza seed	23400	1.81969	12859.3
DZA	Rice	316.14	4.04349	78.1849
DZA	Seed cotton, unginned	80	1.95989	40.8186
DZA	Sorghum	4973	2.46474	2017.66
DZA	Strawberries		19.3337
DZA	Sugar beet		53.5595
DZA	Sunflower seed	85.78	1.49408	57.4132
DZA	Tangerines, mandarins, clementines	250669	11.0637	22656.9
DZA	Tomatoes	1286286	31.2721	41132.1
DZA	Triticale	35	2.46474	14.2003
DZA	Unmanufactured tobacco	10292	1.60637	6406.98
DZA	Vetches	77.58	1.50376	51.5908
DZA	Watermelons	1.89127e+06	28.8213	65620.7
DZA	Wheat	2436503	2.46474	988543
AGO	Avocados	48996	8.3886	5840.78
AGO	Bananas	3915948	18.5703	210871
AGO	Beans, dry	336120	0.781585	430050
AGO	Cabbages	281377	25.8212	10897.1
AGO	Carrots and turnips	132150	30.503	4332.35
AGO	Cashew nuts, in shell	2096.28	0.656501	3193.11
AGO	Cassava, fresh	8326745	10.4484	796939
AGO	Castor oil seeds	4113.31	1.22905	3346.75
AGO	Cocoa beans	447.67	0.401193	1115.85
AGO	Coffee, green	13543	0.741331	18268.5
AGO	Groundnuts, excluding shelled	217522	1.4324	151858
AGO	Kenaf, and other textile bast fibres, raw or retted	827.88	1.31607	629.055
AGO	Maize (corn)	2380522	4.98183	477840
AGO	Mangoes, guavas and mangosteens	216119	7.12099	30349.6
AGO	Millet	54430	2.46474	22083.5
AGO	Oil palm fruit	280439	13.1294	21359.6
AGO	Onions and shallots, green	550722	20.0578	27456.7
AGO	Other citrus fruit, n.e.c.	416359	8.436	49355
AGO	Other fruits, n.e.c.	38617.2	5.45585	7078.13
AGO	Other vegetables, fresh n.e.c.	356814	12.6358	28238.2
AGO	Pineapples	544303	22.4434	24252.3
AGO	Potatoes	461186	17.8256	25872.1
AGO	Rice	9426	4.04349	2331.15
AGO	Seed cotton, unginned	3000	1.95989	1530.7
AGO	Sesame seed	3144.83	0.461944	6807.82
AGO	Sisal, raw	564.82	0.797094	708.599
AGO	Sorghum	33463	2.46474	13576.7
AGO	Soya beans	36001	2.31084	15579.2
AGO	Sugar cane	577141	61.8313	9334.13
AGO	Sunflower seed	11946.7	1.49408	7996.03
AGO	Sweet potatoes	1696027	11.077	153113
AGO	Tomatoes	618215	31.2721	19768.9
AGO	Unmanufactured tobacco	2895.75	1.60637	1802.66
AGO	Wheat	5342.07	2.46474	2167.4
ATG	Bananas	184.68	18.5703	9.9449
ATG	Cabbages	92.82	25.8212	3.59472
ATG	Cantaloupes and other melons	557.87	22.6283	24.6536
ATG	Carrots and turnips	11.42	30.503	0.374389
ATG	Cassava, fresh	102.69	10.4484	9.82829
ATG	Chillies and peppers, green (Capsicum spp. and Pimenta spp.)	88.21	14.641	6.02487
ATG	Cucumbers and gherkins	80	31.707	2.5231
ATG	Eggplants (aubergines)	190.03	23.9257	7.94252
ATG	Lemons and limes	424.57	13.6502	31.1035
ATG	Maize (corn)	51.47	4.98183	10.3315
ATG	Mangoes, guavas and mangosteens	1412.7	7.12099	198.385
ATG	Onions and shallots, dry (excluding dehydrated)	17.63	16.4524	1.07158
ATG	Other beans, green	100.74	12.7827	7.88093
ATG	Other tropical fruits, n.e.c.	6473.71	6.4614	1001.9
ATG	Other vegetables, fresh n.e.c.	200	12.6358	15.828
ATG	Pineapples	277.82	22.4434	12.3787
ATG	Pumpkins, squash and gourds	317.74	11.7861	26.9588
ATG	Seed cotton, unginned	105	1.95989	53.5744
ATG	Sugar cane		61.8313
ATG	Sweet potatoes	209.21	11.077	18.8869
ATG	Taro	38.7	5.98104	6.47045
ATG	Tomatoes	178.73	31.2721	5.71532
ATG	Yams	140.2	7.86085	17.8352
ARG	Almonds, in shell	688.42	1.35127	509.461
ARG	Anise, badian, coriander, cumin, caraway, fennel and juniper berries, raw	7620.33	0.78612	9693.6
ARG	Apples	458908	14.732	31150.4
ARG	Apricots	27104.8	5.3409	5074.94
ARG	Artichokes	37720.1	10.8305	3482.78
ARG	Asparagus	10342.3	4.81475	2148.04
ARG	Avocados	4033.27	8.3886	480.804
ARG	Bananas	176410	18.5703	9499.55
ARG	Barley	3741158	2.46474	1.51787e+06
ARG	Beans, dry	413605	0.781585	529187
ARG	Broad beans and horse beans, dry	16675.6	1.72449	9669.86
ARG	Canary seed	44354	0.86007	51570.2
ARG	Cantaloupes and other melons	80627.1	22.6283	3563.1
ARG	Carrots and turnips	290290	30.503	9516.77
ARG	Cassava, fresh	193430	10.4484	18512.9
ARG	Castor oil seeds		1.22905
ARG	Cereals n.e.c.	16549.6	2.46474	6714.52
ARG	Cherries	7246.45	4.68509	1546.7
ARG	Chick peas, dry	184000	0.85568	215034
ARG	Chillies and peppers, dry (Capsicum spp., Pimenta spp.), raw	3180.98	1.96641	1617.66
ARG	Chillies and peppers, green (Capsicum spp. and Pimenta spp.)	145180	14.641	9916.03
ARG	Figs	866.06	3.25592	265.995
ARG	Flax, raw or retted	2542.89
ARG	Grapes	1.96521e+06	9.35482	210074
ARG	Green garlic	149534	15.6636	9546.6
ARG	Groundnuts, excluding shelled	1031082	1.4324	719827
ARG	Hop cones	477.96	1.42143	336.254
ARG	Lemons and limes	1676000	13.6502	122782
ARG	Lentils, dry	20000	1.03754	19276.4
ARG	Linseed	13575	0.894832	15170.5
ARG	Lupins	162.14	1.34409	120.632
ARG	Maize (corn)	49475895	4.98183	9.93126e+06
ARG	Mangoes, guavas and mangosteens	2193.87	7.12099	308.085
ARG	Maté leaves	690100	3.10959	221927
ARG	Millet	5328	2.46474	2161.69
ARG	Oats	784981	2.46474	318484
ARG	Olives	400000	1.41404	282877
ARG	Onions and shallots, dry (excluding dehydrated)	665408	16.4524	40444.4
ARG	Oranges	1025000	15.87	64587.4
ARG	Other beans, green	3351.75	12.7827	262.209
ARG	Other fibre crops, raw, n.e.c.	1566.16	0.373869	4189.06
ARG	Other oil seeds, n.e.c.	0	0.76192	0
ARG	Other stimulant, spice and aromatic crops, n.e.c.	1503.06	2.24648	669.073
ARG	Other vegetables, fresh n.e.c.	841623	12.6358	66606
ARG	Papayas	2212.53	26.5499	83.3349
ARG	Peaches and nectarines	89705	12.656	7087.96
ARG	Pears	517754	14.6345	35379.1
ARG	Peas, dry	120000	1.52322	78780.5
ARG	Peas, green	28730.1	6.56283	4377.7
ARG	Peppermint, spearmint	6979.91	18.8744	369.808
ARG	Pineapples	3258.91	22.4434	145.206
ARG	Plums and sloes	39110	3.98017	9826.21
ARG	Pomelos and grapefruits	112000	22.1027	5067.25
ARG	Potatoes	2.45931e+06	17.8256	137965
ARG	Pumpkins, squash and gourds	263225	11.7861	22333.4
ARG	Quinces	28967.9	6.93308	4178.21
ARG	Rape or colza seed	49840	1.81969	27389.2
ARG	Rice	1328340	4.04349	328513
ARG	Rye	78810	2.46474	31975
ARG	Safflower seed	17584	0.725215	24246.6
ARG	Seed cotton, unginned	616160	1.95989	314385
ARG	Sorghum	2526931	2.46474	1.02523e+06
ARG	Soya beans	54971626	2.31084	2.37886e+07
ARG	Strawberries	38326.6	19.3337	1982.38
ARG	String beans	49125.4	8.12007	6049.87
ARG	Sugar cane	1.88998e+07	61.8313	305667
ARG	Sunflower seed	3546707	1.49408	2.37384e+06
ARG	Sweet potatoes	150410	11.077	13578.6
ARG	Tangerines, mandarins, clementines	459000	11.0637	41487
ARG	Tea leaves	354000	1.28543	275394
ARG	Tomatoes	1.02888e+06	31.2721	32900.9
ARG	Tung nuts	6400	2.46977	2591.34
ARG	Unmanufactured tobacco	117154	1.60637	72930.7
ARG	Walnuts, in shell	18412	2.79817	6580.03
ARG	Watermelons	125165	28.8213	4342.81
ARG	Wheat	18395106	2.46474	7.4633e+06
ARM	Almonds, in shell		1.35127
ARM	Apples	116051	14.732	7877.48
ARM	Apricots	87320	5.3409	16349.3
ARM	Barley	92930	2.46474	37703.7
ARM	Beans, dry	3672	0.781585	4698.14
ARM	Cabbages	117085	25.8212	4534.45
ARM	Carrots and turnips	18848	30.503	617.905
ARM	Cauliflowers and broccoli	16780	16.7959	999.056
ARM	Cereals n.e.c.	12076	2.46474	4899.5
ARM	Cherries	8414	4.68509	1795.91
ARM	Cucumbers and gherkins	74336	31.707	2344.47
ARM	Eggplants (aubergines)	84500	23.9257	3531.77
ARM	Figs	909	3.25592	279.184
ARM	Grapes	209954	9.35482	22443.4
ARM	Green garlic	12610	15.6636	805.051
ARM	Hazelnuts, in shell	448	0.99268	451.303
ARM	Lentils, dry	96	1.03754	92.5268
ARM	Linseed	472	0.894832	527.474
ARM	Maize (corn)	10413	4.98183	2090.19
ARM	Mushrooms and truffles	300	267.226	1.12265
ARM	Oats	5854	2.46474	2375.1
ARM	Onions and shallots, dry (excluding dehydrated)	48907	16.4524	2972.64
ARM	Other berries and fruits of the genus vaccinium n.e.c.	16322	6.4383	2535.14
ARM	Other fruits, n.e.c.	1200	5.45585	219.947
ARM	Other pulses n.e.c.	497	0.693528	716.626
ARM	Other stone fruits		6.62653
ARM	Other tropical fruits, n.e.c.	3803	6.4614	588.572
ARM	Other vegetables, fresh n.e.c.	288111	12.6358	22801.1
ARM	Peaches and nectarines	73168	12.656	5781.3
ARM	Pears	18175	14.6345	1241.93
ARM	Peas, dry	178	1.52322	116.858
ARM	Peas, green	678	6.56283	103.309
ARM	Plums and sloes	24016	3.98017	6033.91
ARM	Potatoes	547420	17.8256	30709.8
ARM	Quinces	2122	6.93308	306.069
ARM	Rice		4.04349
ARM	Rye	328	2.46474	133.077
ARM	Seed cotton, unginned		1.95989
ARM	Sour cherries	4127	5.67798	726.844
ARM	Sugar beet	55237	53.5595	1031.32
ARM	Sunflower seed		1.49408
ARM	Tomatoes	234228	31.2721	7490
ARM	Unmanufactured tobacco	1087	1.60637	676.68
ARM	Vetches		1.50376
ARM	Walnuts, in shell	5262	2.79817	1880.52
ARM	Watermelons	215807	28.8213	7487.76
ARM	Wheat	176428	2.46474	71580.7
AUS	Almonds, in shell	185980	1.35127	137633
AUS	Anise, badian, coriander, cumin, caraway, fennel and juniper berries, raw	1152.85	0.78612	1466.51
AUS	Apples	313730	14.732	21295.8
AUS	Apricots	5351	5.3409	1001.89
AUS	Asparagus	7799.14	4.81475	1619.84
AUS	Avocados	56501	8.3886	6735.45
AUS	Bananas	412972	18.5703	22238.3
AUS	Barley	13505990	2.46474	5.47968e+06
AUS	Beans, dry	103000	0.781585	131783
AUS	Blueberries	8617.75	4.99704	1724.57
AUS	Broad beans and horse beans, dry	483578	1.72449	280417
AUS	Cabbages	99101.7	25.8212	3837.99
AUS	Canary seed	4970.84	0.86007	5779.58
AUS	Cantaloupes and other melons	263528	22.6283	11645.9
AUS	Carrots and turnips	283816	30.503	9304.51
AUS	Cauliflowers and broccoli	140657	16.7959	8374.51
AUS	Cherries	11532	4.68509	2461.43
AUS	Chick peas, dry	2004000	0.85568	2.342e+06
AUS	Chillies and peppers, green (Capsicum spp. and Pimenta spp.)	38579	14.641	2635
AUS	Cow peas, dry		0.395686
AUS	Cucumbers and gherkins	29807.6	31.707	940.096
AUS	Currants	591.67	4.73078	125.068
AUS	Figs	73.51	3.25592	22.5773
AUS	Grapes	1.82443e+06	9.35482	195026
AUS	Green corn (maize)	102665	8.79569	11672.2
AUS	Groundnuts, excluding shelled	16529	1.4324	11539.3
AUS	Hop cones	583.41	1.42143	410.44
AUS	Kiwi fruit	2567.57	13.69	187.551
AUS	Lemons and limes	47446.6	13.6502	3475.88
AUS	Lentils, dry	865300	1.03754	833994
AUS	Lettuce and chicory	146262	19.0797	7665.86
AUS	Linseed	6000	0.894832	6705.17
AUS	Lupins	1031425	1.34409	767377
AUS	Maize (corn)	436194	4.98183	87556.9
AUS	Mangoes, guavas and mangosteens	43748	7.12099	6143.53
AUS	Millet	36802.2	2.46474	14931.5
AUS	Mushrooms and truffles	46326	267.226	173.359
AUS	Mustard seed		0.744271
AUS	Oats	2.2655e+06	2.46474	919165
AUS	Olives	122570	1.41404	86680.7
AUS	Onions and shallots, dry (excluding dehydrated)	263236	16.4524	15999.9
AUS	Oranges	332321	15.87	20940.2
AUS	Other beans, green	41373	12.7827	3236.63
AUS	Other berries and fruits of the genus vaccinium n.e.c.	6558.07	6.4383	1018.6
AUS	Other citrus fruit, n.e.c.	1095.08	8.436	129.81
AUS	Other fibre crops, raw, n.e.c.		0.373869
AUS	Other nuts (excluding wild edible nuts and groundnuts), in shell, n.e.c.	46165	1.35769	34002.6
AUS	Other pulses n.e.c.		0.693528
AUS	Other stone fruits		6.62653
AUS	Other tropical fruits, n.e.c.	7409.3	6.4614	1146.7
AUS	Other vegetables, fresh n.e.c.	77204.8	12.6358	6109.98
AUS	Papayas	10198	26.5499	384.106
AUS	Peaches and nectarines	82659	12.656	6531.22
AUS	Pears	96741	14.6345	6610.48
AUS	Peas, dry	415186	1.52322	272571
AUS	Peas, green	20574	6.56283	3134.93
AUS	Persimmons	1600.34	4.57848	349.535
AUS	Pineapples	85921.7	22.4434	3828.38
AUS	Pistachios, in shell	1506.09	1.26403	1191.5
AUS	Plums and sloes	18701.5	3.98017	4698.65
AUS	Pomelos and grapefruits	8178.71	22.1027	370.032
AUS	Potatoes	1.10519e+06	17.8256	62000.4
AUS	Pumpkins, squash and gourds	101504	11.7861	8612.12
AUS	Quinces		6.93308
AUS	Rape or colza seed	4313230	1.81969	2.3703e+06
AUS	Raspberries	614.99	5.89922	104.249
AUS	Rice	807304	4.04349	199655
AUS	Rye	30000	2.46474	12171.7
AUS	Safflower seed	3546.2	0.725215	4889.86
AUS	Seed cotton, unginned	2150961	1.95989	1.09749e+06
AUS	Sorghum	994001	2.46474	403288
AUS	Soya beans	31335	2.31084	13560
AUS	Spinach	9085.82	22.7756	398.928
AUS	Strawberries	45251	19.3337	2340.53
AUS	Sugar cane	3.65615e+07	61.8313	591311
AUS	Sunflower seed	17000	1.49408	11378.2
AUS	Sweet potatoes	77020.7	11.077	6953.22
AUS	Tangerines, mandarins, clementines	127267	11.0637	11503.1
AUS	Tomatoes	371578	31.2721	11882.1
AUS	Triticale	149949	2.46474	60837.7
AUS	Unmanufactured tobacco		1.60637
AUS	Vetches	7763.2	1.50376	5162.54
AUS	Walnuts, in shell	6750	2.79817	2412.29
AUS	Watermelons	170572	28.8213	5918.27
AUS	Wheat	3.18187e+07	2.46474	1.29096e+07
AUT	Apples	185240	14.732	12574
AUT	Apricots	6484	5.3409	1214.03
AUT	Asparagus	3038	4.81475	630.978
AUT	Barley	782029	2.46474	317286
AUT	Beans, dry		0.781585
AUT	Broad beans and horse beans, dry	22962	1.72449	13315.2
AUT	Broad beans and horse beans, green	554	5.62802	98.436
AUT	Buckwheat	0	0.853104	0
AUT	Cabbages	61790	25.8212	2392.99
AUT	Cantaloupes and other melons		22.6283
AUT	Carrots and turnips	97813	30.503	3206.66
AUT	Cauliflowers and broccoli	5884	16.7959	350.325
AUT	Cereals n.e.c.	43535	2.46474	17663.1
AUT	Cherries	5548	4.68509	1184.18
AUT	Chillies and peppers, green (Capsicum spp. and Pimenta spp.)	15806	14.641	1079.57
AUT	Cucumbers and gherkins	46581	31.707	1469.11
AUT	Currants	2963	4.73078	626.324
AUT	Eggplants (aubergines)	1062	23.9257	44.3875
AUT	Flax, raw or retted
AUT	Gooseberries	62	5.00196	12.3951
AUT	Grapes	331428	9.35482	35428.6
AUT	Green corn (maize)	14925	8.79569	1696.85
AUT	Green garlic	1091	15.6636	69.6519
AUT	Hop cones	440	1.42143	309.548
AUT	Leeks and other alliaceous vegetables	5869	14.9016	393.851
AUT	Lettuce and chicory	47264	19.0797	2477.19
AUT	Linseed	1786	0.894832	1995.91
AUT	Lupins	334	1.34409	248.495
AUT	Maize (corn)	2075983	4.98183	416711
AUT	Millet	10608.2	2.46474	4303.99
AUT	Mixed grain	10347	2.46474	4198.01
AUT	Mushrooms and truffles	1900	267.226	7.11009
AUT	Oats	76672	2.46474	31107.5
AUT	Onions and shallots, dry (excluding dehydrated)	144682	16.4524	8793.98
AUT	Other beans, green	6156	12.7827	481.587
AUT	Other berries and fruits of the genus vaccinium n.e.c.	892	6.4383	138.546
AUT	Other oil seeds, n.e.c.	17746	0.76192	23291.2
AUT	Other pulses n.e.c.	7889	0.693528	11375.2
AUT	Other stimulant, spice and aromatic crops, n.e.c.		2.24648
AUT	Other vegetables, fresh n.e.c.	41403	12.6358	3276.63
AUT	Peaches and nectarines	1857	12.656	146.729
AUT	Pears	46110	14.6345	3150.78
AUT	Peas, dry	15259	1.52322	10017.6
AUT	Peas, green	12406	6.56283	1890.34
AUT	Plums and sloes	9721	3.98017	2442.36
AUT	Poppy seed	1799	0.729367	2466.52
AUT	Potatoes	653400	17.8256	36655.2
AUT	Pumpkins, squash and gourds	25065	11.7861	2126.65
AUT	Quinces		6.93308
AUT	Rape or colza seed	116835	1.81969	64205.8
AUT	Raspberries	1102	5.89922	186.804
AUT	Rye	129070	2.46474	52366.5
AUT	Sorghum	20331	2.46474	8248.73
AUT	Sour cherries	577	5.67798	101.621
AUT	Soya beans	193416	2.31084	83699.6
AUT	Spinach	11441	22.7756	502.336
AUT	Strawberries	11567	19.3337	598.282
AUT	Sugar beet	2993710	53.5595	55895
AUT	Sunflower seed	51381	1.49408	34389.7
AUT	Tomatoes	54258	31.2721	1735.03
AUT	Triticale	289131	2.46474	117307
AUT	True hemp, raw or retted	3331.83	1.53278	2173.72
AUT	Unmanufactured tobacco	107.84	1.60637	67.1326
AUT	Vetches	3693	1.50376	2455.85
AUT	Walnuts, in shell	2633	2.79817	940.974
AUT	Watermelons	754	28.8213	26.1612
AUT	Wheat	1437143	2.46474	583081
AZE	Almonds, in shell	1087.7	1.35127	804.945
AZE	Apples	275093	14.732	18673.2
AZE	Apricots	26919.9	5.3409	5040.33
AZE	Barley	792182	2.46474	321406
AZE	Beans, dry	9290.6	0.781585	11886.9
AZE	Broad beans and horse beans, dry	116.7	1.72449	67.6721
AZE	Cabbages	92056.6	25.8212	3565.15
AZE	Cantaloupes and other melons	102304	22.6283	4521.05
AZE	Carrots and turnips	25493.4	30.503	835.766
AZE	Cherries	10281.8	4.68509	2194.58
AZE	Chestnuts, in shell	633.5	3.26757	193.875
AZE	Chillies and peppers, green (Capsicum spp. and Pimenta spp.)	47843.2	14.641	3267.76
AZE	Cranberries	2772.11	13.8874	199.613
AZE	Cucumbers and gherkins	220903	31.707	6967
AZE	Currants	2185.14	4.73078	461.898
AZE	Eggplants (aubergines)	77816.6	23.9257	3252.43
AZE	Figs	9262.8	3.25592	2844.91
AZE	Grapes	152843	9.35482	16338.4
AZE	Green garlic	21541	15.6636	1375.23
AZE	Hazelnuts, in shell	45530.4	0.99268	45866.1
AZE	Lemons and limes	4580.5	13.6502	335.562
AZE	Lentils, dry	1889.3	1.03754	1820.95
AZE	Linseed		0.894832
AZE	Maize (corn)	235669	4.98183	47305.6
AZE	Millet	851.4	2.46474	345.432
AZE	Mushrooms and truffles	1500	267.226	5.61323
AZE	Oats	9355.1	2.46474	3795.57
AZE	Olives	1679.5	1.41404	1187.73
AZE	Onions and shallots, dry (excluding dehydrated)	207497	16.4524	12612
AZE	Onions and shallots, green		20.0578
AZE	Oranges	3017.8	15.87	190.158
AZE	Other beans, green		12.7827
AZE	Other berries and fruits of the genus vaccinium n.e.c.	8404.4	6.4383	1305.38
AZE	Other citrus fruit, n.e.c.	4188.89	8.436	496.55
AZE	Other fruits, n.e.c.	187923	5.45585	34444.3
AZE	Other nuts (excluding wild edible nuts and groundnuts), in shell, n.e.c.	3862.12	1.35769	2844.62
AZE	Other oil seeds, n.e.c.	21665.6	0.76192	28435.5
AZE	Other pulses n.e.c.	3653.7	0.693528	5268.28
AZE	Other stimulant, spice and aromatic crops, n.e.c.		2.24648
AZE	Other vegetables, fresh n.e.c.	57306.7	12.6358	4535.25
AZE	Peaches and nectarines	24270.5	12.656	1917.71
AZE	Pears	50492.3	14.6345	3450.23
AZE	Peas, dry	15793	1.52322	10368.2
AZE	Peas, green	2291.9	6.56283	349.224
AZE	Persimmons	147219	4.57848	32154.6
AZE	Pistachios, in shell	25.6	1.26403	20.2527
AZE	Plums and sloes	33559.1	3.98017	8431.57
AZE	Potatoes	913899	17.8256	51268.9
AZE	Pumpkins, squash and gourds	28672.7	11.7861	2432.75
AZE	Quinces	29602.4	6.93308	4269.73
AZE	Raspberries	11876.8	5.89922	2013.29
AZE	Rice	15915.7	4.04349	3936.13
AZE	Rye	778	2.46474	315.652
AZE	Seed cotton, unginned	207525	1.95989	105886
AZE	Sorghum	202.4	2.46474	82.1181
AZE	Sour cherries	36088.6	5.67798	6355.89
AZE	Soya beans	28.89	2.31084	12.502
AZE	Sugar beet	410084	53.5595	7656.62
AZE	Sunflower seed	29793.5	1.49408	19941
AZE	Tangerines, mandarins, clementines	35221.1	11.0637	3183.48
AZE	Tea leaves	775.2	1.28543	603.066
AZE	Tomatoes	624198	31.2721	19960.2
AZE	Unmanufactured tobacco	5315.6	1.60637	3309.07
AZE	Walnuts, in shell	9853	2.79817	3521.24
AZE	Watermelons	335776	28.8213	11650.3
AZE	Wheat	1.76957e+06	2.46474	717955
BHS	Avocados	1394.98	8.3886	166.295
BHS	Bananas	10084.3	18.5703	543.032
BHS	Cabbages	1475.4	25.8212	57.139
BHS	Cassava, fresh	842.97	10.4484	80.6792
BHS	Coconuts, in shell	2784.25	4.50031	618.68
BHS	Lemons and limes	2250	13.6502	164.832
BHS	Lettuce and chicory	125.59	19.0797	6.5824
BHS	Maize (corn)	647.78	4.98183	130.028
BHS	Mangoes, guavas and mangosteens	2565.02	7.12099	360.205
BHS	Millet		2.46474
BHS	Okra	489.95	4.70824	104.062
BHS	Onions and shallots, dry (excluding dehydrated)	838.44	16.4524	50.9616
BHS	Onions and shallots, green	661.49	20.0578	32.9791
BHS	Oranges	3676.02	15.87	231.634
BHS	Other tropical fruits, n.e.c.	4771.36	6.4614	738.44
BHS	Other vegetables, fresh n.e.c.	20000	12.6358	1582.8
BHS	Papayas	572.44	26.5499	21.5609
BHS	Pigeon peas, dry	181.28	0.769597	235.552
BHS	Plantains and cooking bananas	192.26	6.56728	29.2754
BHS	Pomelos and grapefruits	21346.4	22.1027	965.781
BHS	Potatoes		17.8256
BHS	Pumpkins, squash and gourds	2099.97	11.7861	178.173
BHS	Sugar cane	61371	61.8313	992.556
BHS	Sweet potatoes	1769.32	11.077	159.729
BHS	Tangerines, mandarins, clementines	785.28	11.0637	70.978
BHS	Taro		5.98104
BHS	Tomatoes	8031.35	31.2721	256.822
BHR	Bananas		18.5703
BHR	Cabbages	670	25.8212	25.9476
BHR	Cantaloupes and other melons	860	22.6283	38.0055
BHR	Carrots and turnips	33	30.503	1.08186
BHR	Cauliflowers and broccoli	1050	16.7959	62.5154
BHR	Chick peas, dry		0.85568
BHR	Chillies and peppers, green (Capsicum spp. and Pimenta spp.)	890	14.641	60.7883
BHR	Cucumbers and gherkins	2640	31.707	83.2624
BHR	Dates	12750	5.80807	2195.22
BHR	Eggplants (aubergines)	1234	23.9257	51.5764
BHR	Grapes	152.14	9.35482	16.2633
BHR	Lemons and limes	1090.75	13.6502	79.9071
BHR	Lettuce and chicory	840	19.0797	44.026
BHR	Okra	56	4.70824	11.894
BHR	Onions and shallots, dry (excluding dehydrated)	150	16.4524	9.11721
BHR	Other fruits, n.e.c.	5563.5	5.45585	1019.73
BHR	Other nuts (excluding wild edible nuts and groundnuts), in shell, n.e.c.	351.78	1.35769	259.101
BHR	Other pulses n.e.c.	9	0.693528	12.9771
BHR	Other vegetables, fresh n.e.c.	300	12.6358	23.742
BHR	Potatoes	75	17.8256	4.20744
BHR	Pumpkins, squash and gourds	2500	11.7861	212.113
BHR	Sweet potatoes		11.077
BHR	Tomatoes	6480	31.2721	207.214
BHR	Watermelons	216.12	28.8213	7.49862
BGD	Anise, badian, coriander, cumin, caraway, fennel and juniper berries, raw		0.78612
BGD	Areca nuts	246863	1.16699	211539
BGD	Bananas	807104	18.5703	43462.1
BGD	Barley	287	2.46474	116.442
BGD	Beans, dry	73970	0.781585	94641
BGD	Cabbages	311650	25.8212	12069.5
BGD	Canary seed		0.86007
BGD	Cantaloupes and other melons	254000	22.6283	11224.9
BGD	Carrots and turnips	16306	30.503	534.57
BGD	Cashew nuts, in shell		0.656501
BGD	Castor oil seeds	269.37	1.22905	219.17
BGD	Cauliflowers and broccoli	277500	16.7959	16521.9
BGD	Chick peas, dry	6237	0.85568	7288.94
BGD	Chillies and peppers, dry (Capsicum spp., Pimenta spp.), raw	136872	1.96641	69605
BGD	Coconuts, in shell	408635	4.50031	90801.5
BGD	Coir, raw	10321.6
BGD	Cucumbers and gherkins	121254	31.707	3824.2
BGD	Eggplants (aubergines)	507432	23.9257	21208.7
BGD	Ginger, raw	77478	5.83278	13283.2
BGD	Green garlic	425401	15.6636	27158.6
BGD	Groundnuts, excluding shelled	66060	1.4324	46118.3
BGD	Jute, raw or retted	1496216	2.09397	714537
BGD	Kenaf, and other textile bast fibres, raw or retted	52	1.31607	39.5116
BGD	Lemons and limes	69132	13.6502	5064.53
BGD	Lentils, dry	168837	1.03754	162729
BGD	Lettuce and chicory	44412	19.0797	2327.72
BGD	Linseed	4165	0.894832	4654.51
BGD	Maize (corn)	3025392	4.98183	607285
BGD	Mangoes, guavas and mangosteens	1517691	7.12099	213129
BGD	Millet	10380	2.46474	4211.39
BGD	Natural rubber in primary forms	21000	1.05929	19824.6
BGD	Okra	61725	4.70824	13110
BGD	Onions and shallots, dry (excluding dehydrated)	1866502	16.4524	113449
BGD	Oranges	3372	15.87	212.477
BGD	Other beans, green	137495	12.7827	10756.3
BGD	Other berries and fruits of the genus vaccinium n.e.c.	79000	6.4383	12270.3
BGD	Other fibre crops, raw, n.e.c.	397.75	0.373869	1063.87
BGD	Other fruits, n.e.c.	718000	5.45585	131602
BGD	Other oil seeds, n.e.c.	1913	0.76192	2510.76
BGD	Other pulses n.e.c.	119000	0.693528	171587
BGD	Other stimulant, spice and aromatic crops, n.e.c.	168000	2.24648	74783.6
BGD	Other sugar crops n.e.c.	258777	6.80946	38002.6
BGD	Other tropical fruits, n.e.c.	1164000	6.4614	180147
BGD	Other vegetables, fresh n.e.c.	1405000	12.6358	111192
BGD	Papayas	134647	26.5499	5071.48
BGD	Peas, dry	18415	1.52322	12089.5
BGD	Pigeon peas, dry	552	0.769597	717.258
BGD	Pineapples	211833	22.4434	9438.55
BGD	Plantains and cooking bananas	150264	6.56728	22880.7
BGD	Pomelos and grapefruits	65560	22.1027	2966.15
BGD	Potatoes	10215957	17.8256	573106
BGD	Pumpkins, squash and gourds	594682	11.7861	50456
BGD	Rape or colza seed	362860	1.81969	199407
BGD	Rice	54148000	4.04349	1.33914e+07
BGD	Seed cotton, unginned	119000	1.95989	60717.6
BGD	Sesame seed	33999	0.461944	73599.8
BGD	Sorghum	92	2.46474	37.3264
BGD	Soya beans	96921	2.31084	41942
BGD	Spinach	66292	22.7756	2910.66
BGD	Sugar cane	3862775	61.8313	62472.8
BGD	Sweet potatoes	262702	11.077	23716
BGD	Tangerines, mandarins, clementines	23206	11.0637	2097.49
BGD	Tea leaves	356000	1.28543	276950
BGD	Tomatoes	388725	31.2721	12430.4
BGD	True hemp, raw or retted		1.53278
BGD	Unmanufactured tobacco	91573	1.60637	57006.1
BGD	Wheat	1311473	2.46474	532093
BRB	Avocados	494.6	8.3886	58.961
BRB	Bananas	1024.54	18.5703	55.1708
BRB	Beans, dry	118.83	0.781585	152.037
BRB	Cabbages	470.82	25.8212	18.2338
BRB	Cantaloupes and other melons	414.44	22.6283	18.3151
BRB	Carrots and turnips	158.2	30.503	5.18637
BRB	Cassava, fresh	478.77	10.4484	45.8223
BRB	Chillies and peppers, green (Capsicum spp. and Pimenta spp.)	148.28	14.641	10.1277
BRB	Coconuts, in shell	1600	4.50031	355.531
BRB	Cucumbers and gherkins	714.51	31.707	22.5348
BRB	Green corn (maize)	615.34	8.79569	69.9593
BRB	Groundnuts, excluding shelled	21.1	1.4324	14.7305
BRB	Lettuce and chicory	586.52	19.0797	30.7406
BRB	Maize (corn)	73.86	4.98183	14.8259
BRB	Okra	340.82	4.70824	72.388
BRB	Onions and shallots, dry (excluding dehydrated)	410.73	16.4524	24.9648
BRB	Other fruits, n.e.c.	1188.7	5.45585	217.876
BRB	Other pulses n.e.c.	1660.32	0.693528	2394.02
BRB	Other tropical fruits, n.e.c.	1746.57	6.4614	270.308
BRB	Other vegetables, fresh n.e.c.	4913.94	12.6358	388.889
BRB	Pumpkins, squash and gourds	418	11.7861	35.4654
BRB	String beans	264.56	8.12007	32.581
BRB	Sugar cane	131194	61.8313	2121.81
BRB	Sweet potatoes	1167.31	11.077	105.382
BRB	Taro	85.3	5.98104	14.2617
BRB	Tomatoes	332.39	31.2721	10.629
BRB	Yams	181.38	7.86085	23.0738
BLR	Apples	317078	14.732	21523.1
BLR	Barley	1419829	2.46474	576056
BLR	Beans, dry	351725	0.781585	450015
BLR	Buckwheat	18010	0.853104	21111.1
BLR	Cabbages	445608	25.8212	17257.4
BLR	Carrots and turnips	337577	30.503	11067
BLR	Cereals n.e.c.	21670	2.46474	8792
BLR	Cherries	4747.27	4.68509	1013.27
BLR	Cranberries	284	13.8874	20.4501
BLR	Cucumbers and gherkins	236618	31.707	7462.64
BLR	Flax, raw or retted	42327
BLR	Grapes	22000	9.35482	2351.73
BLR	Green garlic	38666	15.6636	2468.52
BLR	Hazelnuts, in shell	1277.9	0.99268	1287.32
BLR	Lentils, dry		1.03754
BLR	Linseed	7325	0.894832	8185.9
BLR	Lupins	11083	1.34409	8245.72
BLR	Maize (corn)	694238	4.98183	139354
BLR	Millet	18365	2.46474	7451.09
BLR	Mushrooms and truffles	11678	267.226	43.7009
BLR	Mustard seed		0.744271
BLR	Oats	460184	2.46474	186707
BLR	Onions and shallots, dry (excluding dehydrated)	242463	16.4524	14737.2
BLR	Other nuts (excluding wild edible nuts and groundnuts), in shell, n.e.c.	1938.05	1.35769	1427.46
BLR	Other pome fruits		4.74292
BLR	Other pulses n.e.c.		0.693528
BLR	Other stone fruits		6.62653
BLR	Other vegetables, fresh n.e.c.	370798	12.6358	29344.9
BLR	Pears	32105	14.6345	2193.79
BLR	Peas, dry	51016	1.52322	33492.2
BLR	Peas, green	7265	6.56283	1106.99
BLR	Plums and sloes	3293	3.98017	827.351
BLR	Potatoes	5009400	17.8256	281023
BLR	Quinces		6.93308
BLR	Rape or colza seed	602451	1.81969	331073
BLR	Raspberries		5.89922
BLR	Rye	669841	2.46474	271769
BLR	Sour cherries	6877	5.67798	1211.17
BLR	Strawberries	75687.5	19.3337	3914.8
BLR	Sugar beet	4989334	53.5595	93155
BLR	Sunflower seed	1079	1.49408	722.183
BLR	Tomatoes	279522	31.2721	8938.39
BLR	Triticale	1607045	2.46474	652014
BLR	Unmanufactured tobacco		1.60637
BLR	Vetches	50037	1.50376	33274.7
BLR	Walnuts, in shell	16879.5	2.79817	6032.35
BLR	Watermelons		28.8213
BLR	Wheat	2620230	2.46474	1.06309e+06
BEL	Apples	86236	14.732	5853.65
BEL	Asparagus	4832	4.81475	1003.58
BEL	Barley	381128	2.46474	154632
BEL	Beans, dry	555.69	0.781585	710.978
BEL	Broad beans and horse beans, dry	3435	1.72449	1991.89
BEL	Cabbages	145240	25.8212	5624.83
BEL	Carrots and turnips	380000	30.503	12457.8
BEL	Cauliflowers and broccoli	129044	16.7959	7683.09
BEL	Cherries	4300	4.68509	917.805
BEL	Chicory roots	327760	31.2074	10502.6
BEL	Chillies and peppers, green (Capsicum spp. and Pimenta spp.)	27600	14.641	1885.12
BEL	Cucumbers and gherkins	25530	31.707	805.185
BEL	Currants	1054.96	4.73078	222.999
BEL	Eggplants (aubergines)	8100	23.9257	338.549
BEL	Flax, raw or retted	69341
BEL	Gooseberries	380	5.00196	75.9703
BEL	Grapes	2388.52	9.35482	255.325
BEL	Green corn (maize)		8.79569
BEL	Hop cones	366.16	1.42143	257.6
BEL	Leeks and other alliaceous vegetables	188100	14.9016	12622.8
BEL	Lettuce and chicory	53370	19.0797	2797.22
BEL	Linseed	11000	0.894832	12292.8
BEL	Maize (corn)	608671	4.98183	122178
BEL	Mixed grain	16949	2.46474	6876.58
BEL	Mushrooms and truffles	28000	267.226	104.78
BEL	Oats	18428	2.46474	7476.65
BEL	Onions and shallots, dry (excluding dehydrated)	92850	16.4524	5643.55
BEL	Other beans, green	123113	12.7827	9631.18
BEL	Other berries and fruits of the genus vaccinium n.e.c.	666	6.4383	103.443
BEL	Other vegetables, fresh n.e.c.	187168	12.6358	14812.5
BEL	Pears	301818	14.6345	20623.8
BEL	Peas, dry	2887	1.52322	1895.33
BEL	Peas, green	64578	6.56283	9839.96
BEL	Plums and sloes	17	3.98017	4.27117
BEL	Potatoes	4416665	17.8256	247771
BEL	Pumpkins, squash and gourds	10200	11.7861	865.423
BEL	Quinces	3310.97	6.93308	477.561
BEL	Rape or colza seed	46090	1.81969	25328.4
BEL	Raspberries	2989	5.89922	506.678
BEL	Rye	2389	2.46474	969.27
BEL	Spinach	81350	22.7756	3571.8
BEL	Strawberries	47500	19.3337	2456.85
BEL	Sugar beet	5941783	53.5595	110938
BEL	Tomatoes	255960	31.2721	8184.94
BEL	Triticale	34106	2.46474	13837.6
BEL	Unmanufactured tobacco	129.29	1.60637	80.4857
BEL	Vanilla, raw		0.0665573
BEL	Walnuts, in shell	370.65	2.79817	132.462
BEL	Wheat	1702721	2.46474	690831
BLZ	Bananas	86935	18.5703	4681.4
BLZ	Beans, dry	6891	0.781585	8816.7
BLZ	Cabbages	1442	25.8212	55.8455
BLZ	Cantaloupes and other melons	742	22.6283	32.7908
BLZ	Carrots and turnips	471	30.503	15.4411
BLZ	Cashew nuts, in shell	0	0.656501	0
BLZ	Cassava, fresh	573	10.4484	54.8409
BLZ	Chillies and peppers, green (Capsicum spp. and Pimenta spp.)	1960	14.641	133.871
BLZ	Cocoa beans	244	0.401193	608.186
BLZ	Coconuts, in shell	1200	4.50031	266.648
BLZ	Coffee, green	89.3	0.741331	120.459
BLZ	Cucumbers and gherkins	472	31.707	14.8863
BLZ	Edible roots and tubers with high starch or inulin content, n.e.c., fresh	185.85	6.75115	27.5286
BLZ	Groundnuts, excluding shelled	125	1.4324	87.2659
BLZ	Maize (corn)	89536	4.98183	17972.5
BLZ	Mangoes, guavas and mangosteens	52	7.12099	7.30235
BLZ	Okra	45	4.70824	9.55772
BLZ	Onions and shallots, green	870	20.0578	43.3746
BLZ	Oranges	130670	15.87	8233.79
BLZ	Other beans, green	200	12.7827	15.6461
BLZ	Other fruits, n.e.c.	6462.99	5.45585	1184.6
BLZ	Other vegetables, fresh n.e.c.	4675.06	12.6358	369.984
BLZ	Papayas	1442	26.5499	54.3129
BLZ	Peas, dry	1670	1.52322	1096.36
BLZ	Peas, green	2597.32	6.56283	395.762
BLZ	Pineapples	1883	22.4434	83.9
BLZ	Plantains and cooking bananas	6081	6.56728	925.954
BLZ	Pomelos and grapefruits	6753	22.1027	305.528
BLZ	Potatoes	1308	17.8256	73.3777
BLZ	Pumpkins, squash and gourds	751	11.7861	63.7189
BLZ	Rice	18751	4.04349	4637.33
BLZ	Sorghum	10089	2.46474	4093.33
BLZ	Soya beans	13037	2.31084	5641.68
BLZ	Sugar cane	1670432	61.8313	27016
BLZ	Sweet potatoes	97	11.077	8.75689
BLZ	Tomatoes	2452	31.2721	78.4086
BLZ	Watermelons	4124	28.8213	143.089
BLZ	Yams	37	7.86085	4.70687
BLZ	Yautia	24	10.7641	2.22963
BEN	Bananas	20310.7	18.5703	1093.72
BEN	Beans, dry	106502	0.781585	136264
BEN	Cashew nuts, in shell	133713	0.656501	203675
BEN	Cassava, fresh	3.95945e+06	10.4484	378952
BEN	Castor oil seeds	641.8	1.22905	522.194
BEN	Chillies and peppers, dry (Capsicum spp., Pimenta spp.), raw	69438.7	1.96641	35312.4
BEN	Chillies and peppers, green (Capsicum spp. and Pimenta spp.)	69438.7	14.641	4742.76
BEN	Cocoa beans		0.401193
BEN	Coconuts, in shell	14400	4.50031	3199.78
BEN	Coffee, green	54.91	0.741331	74.0695
BEN	Dates	1412.49	5.80807	243.194
BEN	Fonio	1393.95	2.46474	565.556
BEN	Groundnuts, excluding shelled	143005	1.4324	99835.9
BEN	Karite nuts (sheanuts)	61529.8	0.997527	61682.3
BEN	Kola nuts	609.8	0.48619	1254.24
BEN	Maize (corn)	1.45428e+06	4.98183	291917
BEN	Mangoes, guavas and mangosteens	15944.9	7.12099	2239.13
BEN	Melonseed		0.365112
BEN	Millet	24716.7	2.46474	10028.1
BEN	Oil palm fruit	592071	13.1294	45094.9
BEN	Okra	40403.2	4.70824	8581.38
BEN	Onions and shallots, dry (excluding dehydrated)	69660.7	16.4524	4234.08
BEN	Oranges	14912.6	15.87	939.676
BEN	Other fruits, n.e.c.	134731	5.45585	24694.8
BEN	Other nuts (excluding wild edible nuts and groundnuts), in shell, n.e.c.	1795.07	1.35769	1322.15
BEN	Other oil seeds, n.e.c.	178.61	0.76192	234.421
BEN	Other pulses n.e.c.	49744.9	0.693528	71727.4
BEN	Other vegetables, fresh n.e.c.	137553	12.6358	10885.9
BEN	Pepper (Piper spp.), raw	176.13	0.845073	208.42
BEN	Pineapples	344811	22.4434	15363.6
BEN	Potatoes	107.97	17.8256	6.05702
BEN	Rice	278718	4.04349	68929.9
BEN	Seed cotton, unginned	597986	1.95989	305112
BEN	Sesame seed	10000	0.461944	21647.6
BEN	Sorghum	138391	2.46474	56148.4
BEN	Soya beans	164761	2.31084	71299.4
BEN	Sugar cane	75500	61.8313	1221.06
BEN	Sweet potatoes	116071	11.077	10478.5
BEN	Taro	1712.36	5.98104	286.298
BEN	Tomatoes	324506	31.2721	10376.8
BEN	Unmanufactured tobacco	3	1.60637	1.86756
BEN	Yams	3.24448e+06	7.86085	412739
BTN	Apples	8039	14.732	545.683
BTN	Apricots	9.33	5.3409	1.7469
BTN	Areca nuts	9342	1.16699	8005.23
BTN	Asparagus	79	4.81475	16.4079
BTN	Avocados	44.47	8.3886	5.30124
BTN	Bananas	3113	18.5703	167.633
BTN	Barley	2005	2.46474	813.473
BTN	Beans, dry	1228.83	0.781585	1572.23
BTN	Buckwheat	3480	0.853104	4079.22
BTN	Cabbages	10562	25.8212	409.043
BTN	Carrots and turnips	13838.2	30.503	453.665
BTN	Cassava, fresh	306	10.4484	29.2867
BTN	Cauliflowers and broccoli	4946	16.7959	294.477
BTN	Cereals n.e.c.	1169	2.46474	474.289
BTN	Chillies and peppers, dry (Capsicum spp., Pimenta spp.), raw	128.16	1.96641	65.1746
BTN	Chillies and peppers, green (Capsicum spp. and Pimenta spp.)	13606	14.641	929.31
BTN	Cucumbers and gherkins	1948	31.707	61.4376
BTN	Edible roots and tubers with high starch or inulin content, n.e.c., fresh	34196.2	6.75115	5065.24
BTN	Eggplants (aubergines)	643	23.9257	26.8749
BTN	Ginger, raw	6445	5.83278	1104.96
BTN	Green garlic	708	15.6636	45.2003
BTN	Groundnuts, excluding shelled	246	1.4324	171.739
BTN	Jute, raw or retted	344.28	2.09397	164.415
BTN	Lentils, dry	55.49	1.03754	53.4824
BTN	Maize (corn)	94052	4.98183	18879
BTN	Mangoes, guavas and mangosteens	1614	7.12099	226.654
BTN	Millet	1739	2.46474	705.551
BTN	Mustard seed	969	0.744271	1301.95
BTN	Nutmeg, mace, cardamoms, raw	1086	0.264973	4098.52
BTN	Oats		2.46474
BTN	Okra	25.9	4.70824	5.501
BTN	Onions and shallots, dry (excluding dehydrated)	489	16.4524	29.7221
BTN	Oranges	28017	15.87	1765.41
BTN	Other beans, green	5273	12.7827	412.509
BTN	Other citrus fruit, n.e.c.		8.436
BTN	Other fruits, n.e.c.	73	5.45585	13.3801
BTN	Other pulses n.e.c.	1114.31	0.693528	1606.73
BTN	Other stimulant, spice and aromatic crops, n.e.c.	2992.12	2.24648	1331.91
BTN	Other tropical fruits, n.e.c.	841.8	6.4614	130.281
BTN	Other vegetables, fresh n.e.c.	10460	12.6358	827.804
BTN	Papayas	278.7	26.5499	10.4972
BTN	Peaches and nectarines	1124	12.656	88.8118
BTN	Pears	1510	14.6345	103.181
BTN	Peas, dry	859	1.52322	563.937
BTN	Peas, green	858	6.56283	130.736
BTN	Persimmons	150.8	4.57848	32.9367
BTN	Pineapples	72.5	22.4434	3.23035
BTN	Plums and sloes	482	3.98017	121.1
BTN	Potatoes	57223	17.8256	3210.16
BTN	Pumpkins, squash and gourds	5204	11.7861	441.535
BTN	Rice	86385	4.04349	21364
BTN	Soya beans	203.55	2.31084	88.085
BTN	Sugar cane	314.94	61.8313	5.09354
BTN	Sunflower seed	3	1.49408	2.00792
BTN	Sweet potatoes	80	11.077	7.22218
BTN	Tomatoes	383	31.2721	12.2473
BTN	Unmanufactured tobacco	210.73	1.60637	131.184
BTN	Walnuts, in shell	239	2.79817	85.4131
BTN	Watermelons	50.17	28.8213	1.74073
BTN	Wheat	3883	2.46474	1575.42
BTN	Yams	56.81	7.86085	7.22695
BOL	Apples	2750.95	14.732	186.733
BOL	Avocados	12509	8.3886	1491.19
BOL	Bananas	289674	18.5703	15598.7
BOL	Barley	45483	2.46474	18453.5
BOL	Beans, dry	104881	0.781585	134190
BOL	Brazil nuts, in shell	25245	0.439712	57412.6
BOL	Broad beans and horse beans, dry	12632	1.72449	7325.06
BOL	Broad beans and horse beans, green	38399.7	5.62802	6822.95
BOL	Cabbages	4546.63	25.8212	176.081
BOL	Carrots and turnips	61298.8	30.503	2009.6
BOL	Cassava, fresh	203318	10.4484	19459.3
BOL	Cauliflowers and broccoli	747.3	16.7959	44.4931
BOL	Cereals n.e.c.	780	2.46474	316.463
BOL	Cherries	882.89	4.68509	188.447
BOL	Chestnuts, in shell	81379.6	3.26757	24905.3
BOL	Chick peas, dry	652	0.85568	761.967
BOL	Chillies and peppers, green (Capsicum spp. and Pimenta spp.)	11695	14.641	798.786
BOL	Cocoa beans	5518	0.401193	13754
BOL	Coffee, green	21181	0.741331	28571.6
BOL	Cucumbers and gherkins	4442	31.707	140.095
BOL	Edible roots and tubers with high starch or inulin content, n.e.c., fresh	52417.6	6.75115	7764.24
BOL	Figs	657	3.25592	201.786
BOL	Grapes	22065.8	9.35482	2358.76
BOL	Green corn (maize)	24887.7	8.79569	2829.54
BOL	Green garlic	2776.68	15.6636	177.27
BOL	Groundnuts, excluding shelled	25353	1.4324	17699.6
BOL	Lemons and limes	32751	13.6502	2399.3
BOL	Lettuce and chicory	17759.8	19.0797	930.822
BOL	Linseed	65	0.894832	72.6394
BOL	Maize (corn)	954909	4.98183	191678
BOL	Mangoes, guavas and mangosteens	18028	7.12099	2531.67
BOL	Natural rubber in primary forms	5700	1.05929	5380.96
BOL	Oats	21021	2.46474	8528.68
BOL	Onions and shallots, dry (excluding dehydrated)	84921.9	16.4524	5161.68
BOL	Oranges	180021	15.87	11343.5
BOL	Other beans, green	1289.68	12.7827	100.892
BOL	Other fruits, n.e.c.	3200	5.45585	586.526
BOL	Other stimulant, spice and aromatic crops, n.e.c.	3435.68	2.24648	1529.36
BOL	Other vegetables, fresh n.e.c.	4400	12.6358	348.216
BOL	Papayas	17339	26.5499	653.073
BOL	Peaches and nectarines	56416.5	12.656	4457.7
BOL	Pears	1907	14.6345	130.309
BOL	Peas, dry	5353.76	1.52322	3514.77
BOL	Peas, green	21492.8	6.56283	3274.93
BOL	Pepper (Piper spp.), raw	27	0.845073	31.9499
BOL	Pineapples	86022	22.4434	3832.85
BOL	Plantains and cooking bananas	481840	6.56728	73369.8
BOL	Plums and sloes	4208.41	3.98017	1057.34
BOL	Pomelos and grapefruits	3781	22.1027	171.065
BOL	Potatoes	1.04529e+06	17.8256	58639.9
BOL	Pumpkins, squash and gourds	24596	11.7861	2086.86
BOL	Pyrethrum, dried flowers		0.330434
BOL	Quinces	135	6.93308	19.4719
BOL	Quinoa	66792	0.889087	75124.3
BOL	Rice	478578	4.04349	118358
BOL	Rye	269	2.46474	109.139
BOL	Seed cotton, unginned	4100	1.95989	2091.95
BOL	Sesame seed	11960.1	0.461944	25890.9
BOL	Sorghum	556868	2.46474	225934
BOL	Sour cherries	74	5.67798	13.0328
BOL	Soya beans	2.67105e+06	2.31084	1.15588e+06
BOL	Strawberries	3288.44	19.3337	170.089
BOL	Sugar cane	8.73168e+06	61.8313	141218
BOL	Sunflower seed	68417	1.49408	45792
BOL	Sweet potatoes	4435	11.077	400.38
BOL	Tangerines, mandarins, clementines	216782	11.0637	19594
BOL	Tea leaves	1177	1.28543	915.645
BOL	Tomatoes	63548.6	31.2721	2032.12
BOL	Unmanufactured tobacco	1137	1.60637	707.806
BOL	Watermelons	58882	28.8213	2043
BOL	Wheat	154293	2.46474	62600.1
BIH	Almonds, in shell	47.1	1.35127	34.8561
BIH	Anise, badian, coriander, cumin, caraway, fennel and juniper berries, raw	772.7	0.78612	982.929
BIH	Apples	52251.9	14.732	3546.83
BIH	Apricots	1202.6	5.3409	225.168
BIH	Avocados	1037.19	8.3886	123.643
BIH	Barley	76324	2.46474	30966.3
BIH	Beans, dry	7851.33	0.781585	10045.4
BIH	Buckwheat	1187	0.853104	1391.39
BIH	Cabbages	59370.6	25.8212	2299.29
BIH	Carrots and turnips	11261.6	30.503	369.196
BIH	Cereals n.e.c.		2.46474
BIH	Cherries	8475	4.68509	1808.93
BIH	Chestnuts, in shell	1753.33	3.26757	536.586
BIH	Chick peas, dry	5314.45	0.85568	6210.79
BIH	Chicory roots	99.85	31.2074	3.19956
BIH	Chillies and peppers, dry (Capsicum spp., Pimenta spp.), raw	25287.7	1.96641	12859.8
BIH	Chillies and peppers, green (Capsicum spp. and Pimenta spp.)	47395.8	14.641	3237.2
BIH	Coconuts, in shell		4.50031
BIH	Cow peas, dry	211.11	0.395686	533.529
BIH	Cucumbers and gherkins	37190.8	31.707	1172.95
BIH	Figs	678	3.25592	208.236
BIH	Grapes	28012.8	9.35482	2994.48
BIH	Green corn (maize)	738.18	8.79569	83.9252
BIH	Green garlic	5560.3	15.6636	354.982
BIH	Lemons and limes	5	13.6502	0.366294
BIH	Lentils, dry		1.03754
BIH	Lettuce and chicory	5684.94	19.0797	297.958
BIH	Linseed		0.894832
BIH	Maize (corn)	709584	4.98183	142434
BIH	Mixed grain		2.46474
BIH	Mushrooms and truffles	1200	267.226	4.49058
BIH	Oats	26969.1	2.46474	10942
BIH	Olives	281.4	1.41404	199.004
BIH	Onions and shallots, dry (excluding dehydrated)	35342.7	16.4524	2148.18
BIH	Oranges	131.35	15.87	8.27664
BIH	Other beans, green	1485.36	12.7827	116.2
BIH	Other berries and fruits of the genus vaccinium n.e.c.	1618.1	6.4383	251.324
BIH	Other fruits, n.e.c.	383.23	5.45585	70.242
BIH	Other vegetables, fresh n.e.c.	517782	12.6358	40977.3
BIH	Peaches and nectarines	5472.25	12.656	432.385
BIH	Pears	15370.2	14.6345	1050.27
BIH	Peas, dry	1712.15	1.52322	1124.03
BIH	Plums and sloes	74397.8	3.98017	18692.1
BIH	Potatoes	337137	17.8256	18913.1
BIH	Quinces	737.7	6.93308	106.403
BIH	Rape or colza seed	6374.9	1.81969	3503.28
BIH	Raspberries	22670.8	5.89922	3843.02
BIH	Rye	10739.8	2.46474	4357.37
BIH	Sour cherries	4055.8	5.67798	714.304
BIH	Soya beans	11739.7	2.31084	5080.3
BIH	Strawberries	9793.3	19.3337	506.541
BIH	Sugar beet	975.49	53.5595	18.2132
BIH	Sunflower seed	471.7	1.49408	315.712
BIH	Tangerines, mandarins, clementines	9.4	11.0637	0.849625
BIH	Tomatoes	46166.2	31.2721	1476.28
BIH	Triticale	49832.6	2.46474	20218.2
BIH	Unmanufactured tobacco	1759.6	1.60637	1095.39
BIH	Vetches	2336	1.50376	1553.44
BIH	Walnuts, in shell	1933.2	2.79817	690.881
BIH	Watermelons	23376.9	28.8213	811.098
BIH	Wheat	292368	2.46474	118620
BWA	Cabbages	13636	25.8212	528.091
BWA	Carrots and turnips	3806	30.503	124.774
BWA	Cereals n.e.c.	3868.96	2.46474	1569.72
BWA	Edible roots and tubers with high starch or inulin content, n.e.c., fresh	101591	6.75115	15047.9
BWA	Groundnuts, excluding shelled	145	1.4324	101.228
BWA	Maize (corn)	12265	4.98183	2461.94
BWA	Millet	1099	2.46474	445.889
BWA	Onions and shallots, dry (excluding dehydrated)	5944.72	16.4524	361.329
BWA	Oranges	3334	15.87	210.082
BWA	Other fruits, n.e.c.	5700.66	5.45585	1044.87
BWA	Other pulses n.e.c.	2348	0.693528	3385.59
BWA	Other vegetables, fresh n.e.c.	42880.5	12.6358	3393.56
BWA	Potatoes	8765	17.8256	491.709
BWA	Seed cotton, unginned	1000	1.95989	510.232
BWA	Sorghum	5975	2.46474	2424.19
BWA	Spinach	518	22.7756	22.7436
BWA	Sunflower seed	78	1.49408	52.206
BWA	Sweet potatoes		11.077
BWA	Tomatoes	7790.86	31.2721	249.132
BWA	Watermelons	11068	28.8213	384.021
BWA	Wheat	0	2.46474	0
BRA	Almonds, in shell		1.35127
BRA	Apples	1307642	14.732	88762
BRA	Avocados	212873	8.3886	25376.5
BRA	Bananas	6584967	18.5703	354596
BRA	Barley	302731	2.46474	122825
BRA	Beans, dry	3046079	0.781585	3.89731e+06
BRA	Brazil nuts, in shell	23357	0.439712	53118.8
BRA	Broad beans and horse beans, dry	10019	1.72449	5809.82
BRA	Buckwheat	62679.9	0.853104	73472.8
BRA	Cantaloupes and other melons	541298	22.6283	23921.3
BRA	Cashew nuts, in shell	133608	0.656501	203515
BRA	Cashewapple	1.22011e+06	2.48206	491574
BRA	Cassava, fresh	18501645	10.4484	1.77076e+06
BRA	Castor oil seeds	13481	1.22905	10968.7
BRA	Cocoa beans	235809	0.401193	587769
BRA	Coconuts, in shell	2210139	4.50031	491108
BRA	Coffee, green	2684508	0.741331	3.6212e+06
BRA	Figs	25891	3.25592	7951.97
BRA	Grapes	1743430	9.35482	186367
BRA	Green garlic	120896	15.6636	7718.27
BRA	Groundnuts, excluding shelled	546929	1.4324	381826
BRA	Jute, raw or retted	42	2.09397	20.0576
BRA	Kenaf, and other textile bast fibres, raw or retted	2807	1.31607	2132.87
BRA	Lemons and limes	1293774	13.6502	94780.4
BRA	Linseed	5953	0.894832	6652.65
BRA	Maize (corn)	97910658	4.98183	1.96535e+07
BRA	Mangoes, guavas and mangosteens	1547928	7.12099	217375
BRA	Maté leaves	619771	3.10959	199310
BRA	Natural rubber in primary forms	190505	1.05929	179842
BRA	Oats	625769	2.46474	253888
BRA	Oil palm fruit	1687371	13.1294	128518
BRA	Olives	1250	1.41404	883.992
BRA	Onions and shallots, dry (excluding dehydrated)	1615316	16.4524	98181.2
BRA	Oranges	17492882	15.87	1.10226e+06
BRA	Other fibre crops, raw, n.e.c.	100532	0.373869	268897
BRA	Other nuts (excluding wild edible nuts and groundnuts), in shell, n.e.c.	2903.86	1.35769	2138.82
BRA	Other oil seeds, n.e.c.	40200	0.76192	52761.5
BRA	Other stone fruits		6.62653
BRA	Other tropical fruits, n.e.c.	1883128	6.4614	291443
BRA	Other vegetables, fresh n.e.c.	2.94707e+06	12.6358	233231
BRA	Papayas	1058487	26.5499	39867.9
BRA	Peaches and nectarines	250449	12.656	19789
BRA	Pears	22125	14.6345	1511.84
BRA	Peas, dry	2763	1.52322	1813.92
BRA	Pepper (Piper spp.), raw	79106	0.845073	93608.4
BRA	Persimmons	182185	4.57848	39791.6
BRA	Pineapples	2309634	22.4434	102909
BRA	Pomelos and grapefruits	81553.5	22.1027	3689.75
BRA	Potatoes	3655069	17.8256	205046
BRA	Pyrethrum, dried flowers		0.330434
BRA	Quinces	491	6.93308	70.8199
BRA	Ramie, raw or retted	80	1.74468	45.8536
BRA	Rape or colza seed	50000	1.81969	27477.1
BRA	Rice	12464766	4.04349	3.08268e+06
BRA	Rye	7577	2.46474	3074.16
BRA	Seed cotton, unginned	3842872	1.95989	1.96076e+06
BRA	Sesame seed	24000	0.461944	51954.3
BRA	Sisal, raw	79629	0.797094	99899.2
BRA	Sorghum	2223627	2.46474	902174
BRA	Soya beans	114732101	2.31084	4.96496e+07
BRA	Strawberries	139508	19.3337	7215.8
BRA	Sugar cane	758646205	61.8313	1.22696e+07
BRA	Sunflower seed	104144	1.49408	69704.3
BRA	Sweet potatoes	780461	11.077	70457.9
BRA	Tangerines, mandarins, clementines	967139	11.0637	87415.5
BRA	Tea leaves	1974	1.28543	1535.67
BRA	Tomatoes	4225414	31.2721	135118
BRA	Triticale	36424	2.46474	14778
BRA	Tung nuts	225	2.46977	91.1018
BRA	Unmanufactured tobacco	865620	1.60637	538866
BRA	Walnuts, in shell	7907	2.79817	2825.78
BRA	Watermelons	2312993	28.8213	80252.9
BRA	Wheat	4342812	2.46474	1.76197e+06
BRA	Yams	251229	7.86085	31959.5
BRN	Bananas	1822	18.5703	98.1136
BRN	Broad beans and horse beans, green	1758.36	5.62802	312.43
BRN	Cassava leaves
BRN	Cassava, fresh	3105.08	10.4484	297.182
BRN	Chillies and peppers, green (Capsicum spp. and Pimenta spp.)	548	14.641	37.4292
BRN	Coconuts, in shell	398.09	4.50031	88.4583
BRN	Cucumbers and gherkins	2301	31.707	72.5707
BRN	Edible roots and tubers with high starch or inulin content, n.e.c., fresh	520.39	6.75115	77.0816
BRN	Eggplants (aubergines)	623	23.9257	26.039
BRN	Green corn (maize)	40.49	8.79569	4.60339
BRN	Lemons and limes	67.28	13.6502	4.92885
BRN	Lettuce and chicory	9	19.0797	0.471707
BRN	Mushrooms and truffles	14.49	267.226	0.0542238
BRN	Natural rubber in primary forms	259.33	1.05929	244.815
BRN	Okra	433.97	4.70824	92.1725
BRN	Onions and shallots, dry (excluding dehydrated)		16.4524
BRN	Onions and shallots, green	100.59	20.0578	5.015
BRN	Oranges	452.46	15.87	28.5105
BRN	Other fruits, n.e.c.	4418.36	5.45585	809.839
BRN	Other vegetables, fresh n.e.c.	3884.82	12.6358	307.444
BRN	Pepper (Piper spp.), raw	28.49	0.845073	33.713
BRN	Pineapples	1211.34	22.4434	53.9732
BRN	Pumpkins, squash and gourds	1235	11.7861	104.784
BRN	Rice	2300	4.04349	568.816
BRN	Spinach	820	22.7756	36.0034
BRN	Sweet potatoes	276.94	11.077	25.0014
BRN	Tomatoes	137.06	31.2721	4.38282
BRN	Watermelons	156	28.8213	5.41266
BGR	Almonds, in shell	713	1.35127	527.651
BGR	Anise, badian, coriander, cumin, caraway, fennel and juniper berries, raw	23712	0.78612	30163.4
BGR	Apples	44927	14.732	3049.62
BGR	Apricots	22542	5.3409	4220.64
BGR	Asparagus	6714.74	4.81475	1394.62
BGR	Barley	595237	2.46474	241501
BGR	Beans, dry	2502	0.781585	3201.19
BGR	Blueberries	98.54	4.99704	19.7197
BGR	Broad beans and horse beans, dry	8	1.72449	4.63904
BGR	Broad beans and horse beans, green	1770.36	5.62802	314.562
BGR	Buckwheat		0.853104
BGR	Cabbages	41817	25.8212	1619.48
BGR	Carrots and turnips	23967	30.503	785.725
BGR	Castor oil seeds		1.22905
BGR	Cauliflowers and broccoli	1980	16.7959	117.886
BGR	Cereals n.e.c.	1902	2.46474	771.683
BGR	Cherries	48391	4.68509	10328.7
BGR	Chestnuts, in shell	502.62	3.26757	153.821
BGR	Chick peas, dry	32383	0.85568	37844.8
BGR	Chillies and peppers, dry (Capsicum spp., Pimenta spp.), raw	1266.36	1.96641	643.995
BGR	Chillies and peppers, green (Capsicum spp. and Pimenta spp.)	54544	14.641	3725.44
BGR	Cranberries	86.09	13.8874	6.19913
BGR	Cucumbers and gherkins	54398	31.707	1715.65
BGR	Currants	0.3	4.73078	0.0634145
BGR	Edible roots and tubers with high starch or inulin content, n.e.c., fresh		6.75115
BGR	Eggplants (aubergines)	11908	23.9257	497.708
BGR	Flax, raw or retted	92.46
BGR	Grapes	201529	9.35482	21542.8
BGR	Green corn (maize)	4156	8.79569	472.504
BGR	Green garlic	18	15.6636	1.14916
BGR	Groundnuts, excluding shelled	751	1.4324	524.294
BGR	Hazelnuts, in shell	313	0.99268	315.308
BGR	Hempseed		3.92762
BGR	Hop cones	124.82	1.42143	87.8132
BGR	Kiwi fruit	132.42	13.69	9.67275
BGR	Lentils, dry	5920	1.03754	5705.82
BGR	Lettuce and chicory	5179	19.0797	271.441
BGR	Linseed	181	0.894832	202.273
BGR	Maize (corn)	2562569	4.98183	514383
BGR	Melonseed		0.365112
BGR	Millet	4432	2.46474	1798.16
BGR	Mushrooms and truffles	1150	267.226	4.30348
BGR	Mustard seed	1050.29	0.744271	1411.17
BGR	Oats	31849	2.46474	12921.8
BGR	Onions and shallots, dry (excluding dehydrated)	23499	16.4524	1428.3
BGR	Onions and shallots, green	5443.54	20.0578	271.392
BGR	Other beans, green	1244	12.7827	97.3187
BGR	Other berries and fruits of the genus vaccinium n.e.c.	284.34	6.4383	44.1638
BGR	Other fruits, n.e.c.	8829.8	5.45585	1618.41
BGR	Other nuts (excluding wild edible nuts and groundnuts), in shell, n.e.c.	770.87	1.35769	567.78
BGR	Other oil seeds, n.e.c.	3440	0.76192	4514.91
BGR	Other pulses n.e.c.	244.68	0.693528	352.805
BGR	Other stimulant, spice and aromatic crops, n.e.c.	828.43	2.24648	368.768
BGR	Other stone fruits		6.62653
BGR	Other vegetables, fresh n.e.c.	41963	12.6358	3320.95
BGR	Peaches and nectarines	34572	12.656	2731.67
BGR	Pears	2840	14.6345	194.062
BGR	Peas, dry	133253	1.52322	87481.2
BGR	Peas, green	5518	6.56283	840.795
BGR	Peppermint, spearmint	123.78	18.8744	6.55808
BGR	Plums and sloes	49194	3.98017	12359.8
BGR	Poppy seed	607.84	0.729367	833.381
BGR	Potatoes	227815	17.8256	12780.2
BGR	Pumpkins, squash and gourds	22367	11.7861	1897.74
BGR	Quinces	450	6.93308	64.9062
BGR	Rape or colza seed	478987	1.81969	263224
BGR	Raspberries	7476	5.89922	1267.29
BGR	Rice	58523	4.04349	14473.4
BGR	Rye	17304	2.46474	7020.61
BGR	Seed cotton, unginned	4383	1.95989	2236.35
BGR	Sesame seed		0.461944
BGR	Sorghum	12219	2.46474	4957.52
BGR	Sour cherries	4106	5.67798	723.145
BGR	Soya beans	20000	2.31084	8654.88
BGR	Spinach	374	22.7756	16.4211
BGR	Strawberries	5359	19.3337	277.185
BGR	Sugar beet		53.5595
BGR	Sunflower seed	2056987	1.49408	1.37676e+06
BGR	Tomatoes	158762	31.2721	5076.8
BGR	Triticale	59140	2.46474	23994.4
BGR	True hemp, raw or retted		1.53278
BGR	Unmanufactured tobacco	13040	1.60637	8117.67
BGR	Vetches	31021	1.50376	20629
BGR	Walnuts, in shell	3549	2.79817	1268.33
BGR	Watermelons	108141	28.8213	3752.12
BGR	Wheat	6132671	2.46474	2.48816e+06
BFA	Almonds, in shell	1700	1.35127	1258.07
BFA	Bambara beans, dry	56101	0.622405	90135.8
BFA	Bananas	54000	18.5703	2907.87
BFA	Cashew nuts, in shell	125000	0.656501	190403
BFA	Cassava, fresh	23000	10.4484	2201.29
BFA	Chillies and peppers, green (Capsicum spp. and Pimenta spp.)	8595.76	14.641	587.103
BFA	Cow peas, dry	555833	0.395686	1.40473e+06
BFA	Fonio	10068	2.46474	4084.81
BFA	Groundnuts, excluding shelled	334328	1.4324	233404
BFA	Karite nuts (sheanuts)	100000	0.997527	100248
BFA	Lemons and limes	311.62	13.6502	22.8289
BFA	Maize (corn)	1533431	4.98183	307804
BFA	Mangoes, guavas and mangosteens	14569.9	7.12099	2046.04
BFA	Millet	828234	2.46474	336033
BFA	Okra	24142.6	4.70824	5127.74
BFA	Onions and shallots, green	17887	20.0578	891.77
BFA	Oranges	604.88	15.87	38.1148
BFA	Other beans, green	9873.7	12.7827	772.424
BFA	Other fruits, n.e.c.	1011000	5.45585	185306
BFA	Other pulses n.e.c.	17002.8	0.693528	24516.4
BFA	Other stimulant, spice and aromatic crops, n.e.c.	6298.4	2.24648	2803.67
BFA	Other tropical fruits, n.e.c.	10096.9	6.4614	1562.65
BFA	Other vegetables, fresh n.e.c.	715000	12.6358	56585.1
BFA	Pepper (Piper spp.), raw	29000	0.845073	34316.5
BFA	Pomelos and grapefruits	247.89	22.1027	11.2154
BFA	Potatoes	32000	17.8256	1795.17
BFA	Rice	325566	4.04349	80516.1
BFA	Seed cotton, unginned	844337	1.95989	430808
BFA	Sesame seed	163787	0.461944	354560
BFA	Sorghum	1365898	2.46474	554175
BFA	Soya beans	18500	2.31084	8005.76
BFA	Sugar cane	494502	61.8313	7997.61
BFA	Sweet potatoes	58749	11.077	5303.7
BFA	Tangerines, mandarins, clementines	327.98	11.0637	29.6447
BFA	Tomatoes	244000	31.2721	7802.49
BFA	Unmanufactured tobacco	762.38	1.60637	474.597
BFA	Walnuts, in shell	107000	2.79817	38239.3
BFA	Yams	46735	7.86085	5945.29
BDI	Bananas	830957	18.5703	44746.5
BDI	Beans, dry	371211	0.781585	474946
BDI	Cassava, fresh	2285265	10.4484	218719
BDI	Cereals n.e.c.	14773	2.46474	5993.73
BDI	Coffee, green	16340	0.741331	22041.5
BDI	Groundnuts, excluding shelled	8923	1.4324	6229.39
BDI	Maize (corn)	228355	4.98183	45837.5
BDI	Maté leaves		3.10959
BDI	Millet	10541	2.46474	4276.7
BDI	Oil palm fruit	85377.2	13.1294	6502.73
BDI	Other fruits, n.e.c.	126153	5.45585	23122.4
BDI	Other vegetables, fresh n.e.c.	485414	12.6358	38415.6
BDI	Peas, dry	19056	1.52322	12510.3
BDI	Pigeon peas, dry	2910.39	0.769597	3781.71
BDI	Plantains and cooking bananas		6.56728
BDI	Potatoes	204891	17.8256	11494.2
BDI	Rice	88297.9	4.04349	21837.1
BDI	Seed cotton, unginned	1835	1.95989	936.276
BDI	Sorghum	25499	2.46474	10345.5
BDI	Soya beans	2167.05	2.31084	937.777
BDI	Sugar cane	215118	61.8313	3479.11
BDI	Sweet potatoes	519637	11.077	46911.4
BDI	Taro	163582	5.98104	27350.1
BDI	Tea leaves	49280	1.28543	38337.3
BDI	Unmanufactured tobacco	1304.03	1.60637	811.785
BDI	Wheat	8060	2.46474	3270.12
BDI	Yams	8551	7.86085	1087.8
CPV	Bananas	10416	18.5703	560.895
CPV	Cabbages	5143.75	25.8212	199.206
CPV	Carrots and turnips	2920	30.503	95.7281
CPV	Cassava, fresh	5597	10.4484	535.68
CPV	Castor oil seeds	70.37	1.22905	57.2558
CPV	Cauliflowers and broccoli	63	16.7959	3.75093
CPV	Chillies and peppers, dry (Capsicum spp., Pimenta spp.), raw	1552.77	1.96641	789.647
CPV	Coconuts, in shell	6000	4.50031	1333.24
CPV	Coffee, green	46.89	0.741331	63.2511
CPV	Cucumbers and gherkins	1470	31.707	46.362
CPV	Green garlic	88.71	15.6636	5.66345
CPV	Groundnuts, excluding shelled	0	1.4324	0
CPV	Lettuce and chicory	841	19.0797	44.0784
CPV	Maize (corn)	4	4.98183	0.802917
CPV	Mangoes, guavas and mangosteens	2991	7.12099	420.026
CPV	Onions and shallots, dry (excluding dehydrated)	3466	16.4524	210.668
CPV	Other beans, green	0	12.7827	0
CPV	Other fruits, n.e.c.	755	5.45585	138.384
CPV	Other oil seeds, n.e.c.		0.76192
CPV	Other pulses n.e.c.	8284	0.693528	11944.7
CPV	Other vegetables, fresh n.e.c.	1572	12.6358	124.408
CPV	Potatoes	4041	17.8256	226.697
CPV	Pumpkins, squash and gourds	791	11.7861	67.1127
CPV	Sugar cane	28375	61.8313	458.91
CPV	Sweet potatoes	5024	11.077	453.553
CPV	Tomatoes	16817	31.2721	537.764
CPV	Watermelons	1180	28.8213	40.9419
KHM	Bananas	151800	18.5703	8174.33
KHM	Beans, dry	78575.8	0.781585	100534
KHM	Cassava, fresh	13817300	10.4484	1.32243e+06
KHM	Castor oil seeds	1282.51	1.22905	1043.5
KHM	Chillies and peppers, dry (Capsicum spp., Pimenta spp.), raw	12877.9	1.96641	6548.94
KHM	Coconuts, in shell	84000	4.50031	18665.4
KHM	Coffee, green	356.64	0.741331	481.081
KHM	Edible roots and tubers with high starch or inulin content, n.e.c., fresh	39031.4	6.75115	5781.44
KHM	Groundnuts, excluding shelled	23100	1.4324	16126.7
KHM	Jute, raw or retted	96000	2.09397	45846
KHM	Lemons and limes	2889.15	13.6502	211.656
KHM	Maize (corn)	1231500	4.98183	247198
KHM	Mangoes, guavas and mangosteens	64825.8	7.12099	9103.48
KHM	Natural rubber in primary forms	193300	1.05929	182481
KHM	Oil palm fruit	307525	13.1294	23422.5
KHM	Oranges	64933.9	15.87	4091.62
KHM	Other fibre crops, raw, n.e.c.	3750.93	0.373869	10032.7
KHM	Other fruits, n.e.c.	71120.8	5.45585	13035.7
KHM	Other nuts (excluding wild edible nuts and groundnuts), in shell, n.e.c.	3199.89	1.35769	2356.86
KHM	Other oil seeds, n.e.c.	567.63	0.76192	745
KHM	Other vegetables, fresh n.e.c.	644188	12.6358	50981
KHM	Pepper (Piper spp.), raw	2498.64	0.845073	2956.71
KHM	Pineapples	23816.8	22.4434	1061.19
KHM	Pomelos and grapefruits	3276.85	22.1027	148.256
KHM	Rice	10518000	4.04349	2.60122e+06
KHM	Seed cotton, unginned	237.84	1.95989	121.354
KHM	Sesame seed	13300	0.461944	28791.4
KHM	Soya beans	73300	2.31084	31720.1
KHM	Sugar cane	629300	61.8313	10177.7
KHM	Sweet potatoes	40800	11.077	3683.31
KHM	Unmanufactured tobacco	14433.2	1.60637	8984.97
CMR	Apricots	921.97	5.3409	172.625
CMR	Avocados	74133.8	8.3886	8837.44
CMR	Bambara beans, dry	41544.5	0.622405	66748.3
CMR	Bananas	1046740	18.5703	56366.3
CMR	Beans, dry	396059	0.781585	506738
CMR	Broad beans and horse beans, dry	385.4	1.72449	223.486
CMR	Cabbages	62985.1	25.8212	2439.28
CMR	Cantaloupes and other melons	46841.6	22.6283	2070.04
CMR	Cassava, fresh	5.32243e+06	10.4484	509401
CMR	Chestnuts, in shell	141.07	3.26757	43.1728
CMR	Chicory roots	150.63	31.2074	4.82674
CMR	Chillies and peppers, dry (Capsicum spp., Pimenta spp.), raw	44432	1.96641	22595.5
CMR	Chillies and peppers, green (Capsicum spp. and Pimenta spp.)	52381.7	14.641	3577.74
CMR	Cocoa beans	322248	0.401193	803224
CMR	Coconuts, in shell	4000	4.50031	888.828
CMR	Coffee, green	31609.8	0.741331	42639.3
CMR	Cow peas, dry	179793	0.395686	454383
CMR	Cucumbers and gherkins	248632	31.707	7841.54
CMR	Dates	592.87	5.80807	102.077
CMR	Edible roots and tubers with high starch or inulin content, n.e.c., fresh	44693.3	6.75115	6620.09
CMR	Eggplants (aubergines)	2172.38	23.9257	90.7971
CMR	Figs	91.74	3.25592	28.1764
CMR	Ginger, raw	44990	5.83278	7713.3
CMR	Groundnuts, excluding shelled	595961	1.4324	416057
CMR	Hazelnuts, in shell	158.95	0.99268	160.122
CMR	Jute, raw or retted	100.21	2.09397	47.8565
CMR	Kola nuts	46855.4	0.48619	96372.6
CMR	Leeks and other alliaceous vegetables	315.99	14.9016	21.2051
CMR	Maize (corn)	2.16923e+06	4.98183	435427
CMR	Mangoes, guavas and mangosteens	881.76	7.12099	123.825
CMR	Melonseed	45700.3	0.365112	125168
CMR	Millet	97518.9	2.46474	39565.5
CMR	Natural rubber in primary forms	53000	1.05929	50033.5
CMR	Oil palm fruit	2400000	13.1294	182795
CMR	Okra	69060	4.70824	14667.9
CMR	Onions and shallots, dry (excluding dehydrated)	333830	16.4524	20290.7
CMR	Other beans, green	4226.8	12.7827	330.664
CMR	Other citrus fruit, n.e.c.	73.9	8.436	8.76008
CMR	Other fruits, n.e.c.	149373	5.45585	27378.5
CMR	Other nuts (excluding wild edible nuts and groundnuts), in shell, n.e.c.	792.88	1.35769	583.991
CMR	Other oil seeds, n.e.c.	155.65	0.76192	204.287
CMR	Other pulses n.e.c.	3352.09	0.693528	4833.39
CMR	Other stone fruits	7214.8	6.62653	1088.77
CMR	Other vegetables, fresh n.e.c.	797336	12.6358	63101.1
CMR	Papayas	43.6	26.5499	1.64219
CMR	Peaches and nectarines	990.1	12.656	78.2318
CMR	Pepper (Piper spp.), raw	95.43	0.845073	112.925
CMR	Pineapples	244963	22.4434	10914.7
CMR	Pistachios, in shell		1.26403
CMR	Plantains and cooking bananas	4.15906e+06	6.56728	633300
CMR	Plums and sloes	611.36	3.98017	153.601
CMR	Pomelos and grapefruits	113.18	22.1027	5.12064
CMR	Potatoes	369493	17.8256	20728.2
CMR	Pumpkins, squash and gourds	178414	11.7861	15137.6
CMR	Rice	287099	4.04349	71002.8
CMR	Seed cotton, unginned	360000	1.95989	183684
CMR	Sesame seed	74017	0.461944	160229
CMR	Sorghum	1138243	2.46474	461810
CMR	Soya beans	57452	2.31084	24862
CMR	Sugar cane	1262509	61.8313	20418.6
CMR	Sweet potatoes	433664	11.077	39150
CMR	Taro	1.87604e+06	5.98104	313665
CMR	Tea leaves	5484.91	1.28543	4266.98
CMR	Tomatoes	1.00976e+06	31.2721	32289.4
CMR	Unmanufactured tobacco	6289.87	1.60637	3915.57
CMR	Watermelons	50108	28.8213	1738.57
CMR	Wheat	800	2.46474	324.578
CMR	Yams	600614	7.86085	76405.8
CAN	Anise, badian, coriander, cumin, caraway, fennel and juniper berries, raw	12090.7	0.78612	15380.3
CAN	Apples	402082	14.732	27293.1
CAN	Apricots	1038	5.3409	194.349
CAN	Asparagus	8956	4.81475	1860.12
CAN	Barley	7891300	2.46474	3.20167e+06
CAN	Beans, dry	322400	0.781585	412495
CAN	Blueberries	173641	4.99704	34748.8
CAN	Broad beans and horse beans, dry		1.72449
CAN	Buckwheat	5400	0.853104	6329.82
CAN	Cabbages	168268	25.8212	6516.65
CAN	Canary seed	145000	0.86007	168591
CAN	Cantaloupes and other melons	14327	22.6283	633.144
CAN	Carrots and turnips	385627	30.503	12642.2
CAN	Cauliflowers and broccoli	74926	16.7959	4460.98
CAN	Cherries	26797	4.68509	5719.64
CAN	Chick peas, dry	95600	0.85568	111724
CAN	Chillies and peppers, green (Capsicum spp. and Pimenta spp.)	71242	14.641	4865.93
CAN	Cranberries	138415	13.8874	9966.92
CAN	Cucumbers and gherkins	62204	31.707	1961.84
CAN	Grapes	131112	9.35482	14015.5
CAN	Green corn (maize)	196869	8.79569	22382.4
CAN	Green garlic	1563	15.6636	99.7854
CAN	Kiwi fruit	27.91	13.69	2.03871
CAN	Leeks and other alliaceous vegetables	5459	14.9016	366.337
CAN	Lentils, dry	2558500	1.03754	2.46593e+06
CAN	Lettuce and chicory	86603	19.0797	4539.02
CAN	Linseed	555100	0.894832	620340
CAN	Maize (corn)	14095500	4.98183	2.82938e+06
CAN	Mixed grain	149200	2.46474	60533.7
CAN	Mushrooms and truffles	120253	267.226	450.005
CAN	Mustard seed	121600	0.744271	163381
CAN	Oats	3733000	2.46474	1.51456e+06
CAN	Onions and shallots, dry (excluding dehydrated)	235882	16.4524	14337.2
CAN	Other beans, green	52196	12.7827	4083.32
CAN	Other berries and fruits of the genus vaccinium n.e.c.		6.4383
CAN	Other fibre crops, raw, n.e.c.	28023.5	0.373869	74955.3
CAN	Other oil seeds, n.e.c.	17606.8	0.76192	23108.5
CAN	Other vegetables, fresh n.e.c.	172039	12.6358	13615.2
CAN	Peaches and nectarines	25682	12.656	2029.24
CAN	Pears	9505	14.6345	649.494
CAN	Peas, dry	4112200	1.52322	2.69968e+06
CAN	Peas, green	46111	6.56283	7026.08
CAN	Plums and sloes	4364	3.98017	1096.44
CAN	Potatoes	5419238	17.8256	304015
CAN	Pumpkins, squash and gourds	133163	11.7861	11298.3
CAN	Rape or colza seed	21328100	1.81969	1.17207e+07
CAN	Raspberries	10743	5.89922	1821.09
CAN	Rye	341300	2.46474	138473
CAN	Safflower seed		0.725215
CAN	Sour cherries	5096	5.67798	897.503
CAN	Soya beans	7716600	2.31084	3.33931e+06
CAN	Spinach	5503	22.7756	241.618
CAN	Strawberries	31275	19.3337	1617.64
CAN	Sugar beet	771100	53.5595	14397.1
CAN	Sunflower seed	57600	1.49408	38552.1
CAN	Tomatoes	492394	31.2721	15745.5
CAN	Triticale	33000	2.46474	13388.8
CAN	Unmanufactured tobacco	27743.8	1.60637	17271.1
CAN	Watermelons	28881	28.8213	1002.07
CAN	Wheat	30377235	2.46474	1.23247e+07
CAF	Avocados	7480.35	8.3886	891.728
CAF	Bananas	62332.3	18.5703	3356.56
CAF	Cassava, fresh	1461120	10.4484	139841
CAF	Chillies and peppers, dry (Capsicum spp., Pimenta spp.), raw	114.48	1.96641	58.2177
CAF	Cocoa beans	130.82	0.401193	326.077
CAF	Coffee, green	9989.67	0.741331	13475.3
CAF	Groundnuts, excluding shelled	349277	1.4324	243840
CAF	Kenaf, and other textile bast fibres, raw or retted	112.28	1.31607	85.3147
CAF	Lemons and limes	2792.23	13.6502	204.555
CAF	Maize (corn)	95720	4.98183	19213.8
CAF	Mangoes, guavas and mangosteens	12288.7	7.12099	1725.7
CAF	Melonseed	38306.8	0.365112	104918
CAF	Millet	10000	2.46474	4057.22
CAF	Natural rubber in primary forms	1160	1.05929	1095.07
CAF	Oil palm fruit	5800	13.1294	441.755
CAF	Oranges	33838.5	15.87	2132.23
CAF	Other beans, green		12.7827
CAF	Other oil seeds, n.e.c.	18084.4	0.76192	23735.3
CAF	Other pulses n.e.c.	47000	0.693528	67769.5
CAF	Other vegetables, fresh n.e.c.	74294.7	12.6358	5879.68
CAF	Pineapples	15834.8	22.4434	705.546
CAF	Plantains and cooking bananas	40630	6.56728	6186.73
CAF	Pomelos and grapefruits	5451.48	22.1027	246.643
CAF	Potatoes	1335.16	17.8256	74.9013
CAF	Pumpkins, squash and gourds	21917	11.7861	1859.56
CAF	Rice	11605	4.04349	2870.05
CAF	Seed cotton, unginned	21500	1.95989	10970
CAF	Sesame seed	278641	0.461944	603192
CAF	Sisal, raw	252.61	0.797094	316.914
CAF	Sorghum	30000	2.46474	12171.7
CAF	Sugar cane	115000	61.8313	1859.9
CAF	Taro	137211	5.98104	22941
CAF	Unmanufactured tobacco	488.88	1.60637	304.338
CAF	Yams	489316	7.86085	62247.3
TCD	Beans, dry	151974	0.781585	194443
TCD	Cassava, fresh	290584	10.4484	27811.3
TCD	Cereals n.e.c.	448500	2.46474	181966
TCD	Dates	20976.8	5.80807	3611.66
TCD	Groundnuts, excluding shelled	870094	1.4324	607436
TCD	Kola nuts		0.48619
TCD	Maize (corn)	396506	4.98183	79590.4
TCD	Mangoes, guavas and mangosteens	35177.5	7.12099	4939.97
TCD	Melonseed	24094.2	0.365112	65991.3
TCD	Millet	660175	2.46474	267848
TCD	Onions and shallots, dry (excluding dehydrated)	21792.6	16.4524	1324.58
TCD	Other fruits, n.e.c.	69672.4	5.45585	12770.2
TCD	Other pulses n.e.c.	44523.2	0.693528	64198.1
TCD	Other vegetables, fresh n.e.c.	82208	12.6358	6505.94
TCD	Potatoes	37080.7	17.8256	2080.2
TCD	Rice	263555	4.04349	65180.1
TCD	Seed cotton, unginned	54545	1.95989	27830.6
TCD	Sesame seed	158715	0.461944	343581
TCD	Sorghum	946295	2.46474	383933
TCD	Sugar cane	433055	61.8313	7003.81
TCD	Sweet potatoes	199912	11.077	18047.5
TCD	Taro	28652	5.98104	4790.47
TCD	Unmanufactured tobacco	180.42	1.60637	112.315
TCD	Wheat	1870	2.46474	758.7
TCD	Yams	461079	7.86085	58655.1
CHL	Almonds, in shell	36619.2	1.35127	27099.8
CHL	Apples	1.72142e+06	14.732	116849
CHL	Apricots	5970.85	5.3409	1117.95
CHL	Artichokes	11170.9	10.8305	1031.43
CHL	Asparagus	9834.94	4.81475	2042.67
CHL	Avocados	200000	8.3886	23841.9
CHL	Barley	95482.2	2.46474	38739.2
CHL	Beans, dry	17442.1	0.781585	22316.3
CHL	Blueberries	95000	4.99704	19011.3
CHL	Broad beans and horse beans, green	20905.9	5.62802	3714.61
CHL	Cabbages	49439.7	25.8212	1914.69
CHL	Cantaloupes and other melons	36953.3	22.6283	1633.05
CHL	Carrots and turnips	160403	30.503	5258.6
CHL	Cauliflowers and broccoli	27279.3	16.7959	1624.17
CHL	Cherries	120000	4.68509	25613.2
CHL	Chestnuts, in shell	2108.25	3.26757	645.205
CHL	Chick peas, dry	244.8	0.85568	286.088
CHL	Chillies and peppers, green (Capsicum spp. and Pimenta spp.)	48115.6	14.641	3286.36
CHL	Cucumbers and gherkins	36636.6	31.707	1155.47
CHL	Currants	26	4.73078	5.49592
CHL	Figs	198.74	3.25592	61.0396
CHL	Flax, raw or retted	3106.3
CHL	Grapes	2383095	9.35482	254745
CHL	Green corn (maize)	138332	8.79569	15727.3
CHL	Green garlic	19168.3	15.6636	1223.75
CHL	Hazelnuts, in shell	16800	0.99268	16923.9
CHL	Hempseed	1524.31	3.92762	388.1
CHL	Kenaf, and other textile bast fibres, raw or retted	9564.58	1.31607	7267.54
CHL	Kiwi fruit	152871	13.69	11166.6
CHL	Lemons and limes	165000	13.6502	12087.7
CHL	Lentils, dry	1152.7	1.03754	1111
CHL	Lettuce and chicory	88937.1	19.0797	4661.36
CHL	Linseed	1343.1	0.894832	1500.95
CHL	Lupins	45436.2	1.34409	33804.4
CHL	Maize (corn)	1.06259e+06	4.98183	213293
CHL	Oats	713102	2.46474	289321
CHL	Olives	129570	1.41404	91631.1
CHL	Onions and shallots, dry (excluding dehydrated)	355883	16.4524	21631.1
CHL	Oranges	138481	15.87	8726
CHL	Other beans, green	41315.2	12.7827	3232.1
CHL	Other fibre crops, raw, n.e.c.	1829.47	0.373869	4893.34
CHL	Other fruits, n.e.c.	14795.6	5.45585	2711.87
CHL	Other nuts (excluding wild edible nuts and groundnuts), in shell, n.e.c.		1.35769
CHL	Other vegetables, fresh n.e.c.	126292	12.6358	9994.74
CHL	Papayas	2511.3	26.5499	94.5881
CHL	Peaches and nectarines	336307	12.656	26573
CHL	Pears	289583	14.6345	19787.7
CHL	Peas, dry	825	1.52322	541.616
CHL	Peas, green	16058.9	6.56283	2446.94
CHL	Persimmons	530.1	4.57848	115.781
CHL	Plums and sloes	357600	3.98017	89845.4
CHL	Pomelos and grapefruits	1332.16	22.1027	60.2714
CHL	Potatoes	1.42648e+06	17.8256	80024.2
CHL	Pumpkins, squash and gourds	85808.5	11.7861	7280.45
CHL	Quinces	514.06	6.93308	74.146
CHL	Rape or colza seed	183191	1.81969	100671
CHL	Raspberries	19191.2	5.89922	3253.18
CHL	Rice	127866	4.04349	31622.7
CHL	Rye	4325.3	2.46474	1754.87
CHL	Sour cherries	229.15	5.67798	40.3577
CHL	Soya beans		2.31084
CHL	Strawberries	24508.8	19.3337	1267.67
CHL	Sugar beet	1.7705e+06	53.5595	33056.6
CHL	Sunflower seed	10763.4	1.49408	7204.02
CHL	Sweet potatoes	15087.7	11.077	1362.07
CHL	Tangerines, mandarins, clementines	124750	11.0637	11275.6
CHL	Tomatoes	993076	31.2721	31756
CHL	Triticale	118903	2.46474	48241.7
CHL	True hemp, raw or retted	4298.75	1.53278	2804.55
CHL	Unmanufactured tobacco	4315.25	1.60637	2686.33
CHL	Walnuts, in shell	100000	2.79817	35737.7
CHL	Watermelons	44543.4	28.8213	1545.5
CHL	Wheat	1.34949e+06	2.46474	547519
HKG	Cabbages	774.99	25.8212	30.0137
HKG	Cucumbers and gherkins	1949.46	31.707	61.4836
HKG	Eggplants (aubergines)	274.87	23.9257	11.4885
HKG	Lettuce and chicory	4455.62	19.0797	233.527
HKG	Mushrooms and truffles	1.12	267.226	0.00419121
HKG	Onions and shallots, green	4837.69	20.0578	241.187
HKG	Other beans, green	301.03	12.7827	23.5497
HKG	Other fruits, n.e.c.	5003.42	5.45585	917.074
HKG	Other stimulant, spice and aromatic crops, n.e.c.	993.74	2.24648	442.354
HKG	Other vegetables, fresh n.e.c.	10802.6	12.6358	854.915
HKG	Peas, green	435.73	6.56283	66.3936
HKG	Pumpkins, squash and gourds	240.06	11.7861	20.368
HKG	Rice	0.05	4.04349	0.0123656
HKG	Spinach	12712	22.7756	558.141
HKG	Sweet potatoes	62.29	11.077	5.62337
HKG	Tomatoes	44.11	31.2721	1.41052
MAC	Chillies and peppers, dry (Capsicum spp., Pimenta spp.), raw		1.96641
MAC	Cinnamon and cinnamon-tree flowers, raw		0.704914
MAC	Edible roots and tubers with high starch or inulin content, n.e.c., fresh		6.75115
MAC	Other pulses n.e.c.		0.693528
MAC	Other stimulant, spice and aromatic crops, n.e.c.		2.24648
MAC	Other vegetables, fresh n.e.c.		12.6358
MAC	Pepper (Piper spp.), raw	215.21	0.845073	254.664
MAC	Sweet potatoes		11.077
CHN	Almonds, in shell	86000	1.35127	63643.7
CHN	Anise, badian, coriander, cumin, caraway, fennel and juniper berries, raw	51931.9	0.78612	66061.1
CHN	Apples	41390000	14.732	2.80953e+06
CHN	Apricots	52660.9	5.3409	9859.93
CHN	Artichokes	80577.6	10.8305	7439.92
CHN	Asparagus	7.30625e+06	4.81475	1.51747e+06
CHN	Avocados	113740	8.3886	13558.9
CHN	Bananas	11169800	18.5703	601487
CHN	Barley	1085200	2.46474	440290
CHN	Beans, dry	1322214	0.781585	1.69171e+06
CHN	Broad beans and horse beans, dry	1803019	1.72449	1.04554e+06
CHN	Broad beans and horse beans, green	114429	5.62802	20331.9
CHN	Buckwheat	508844	0.853104	596462
CHN	Cabbages	3.46529e+07	25.8212	1.34203e+06
CHN	Cantaloupes and other melons	12326500	22.6283	544738
CHN	Carrots and turnips	1.79857e+07	30.503	589637
CHN	Cashew nuts, in shell	233.67	0.656501	355.932
CHN	Cassava, fresh	4.94656e+06	10.4484	473427
CHN	Castor oil seeds	32000	1.22905	26036.4
CHN	Cauliflowers and broccoli	9.56655e+06	16.7959	569578
CHN	Cereals n.e.c.	42011.8	2.46474	17045.1
CHN	Cherries	36324.6	4.68509	7753.23
CHN	Chestnuts, in shell	1.56832e+06	3.26757	479965
CHN	Chick peas, dry	15626	0.85568	18261.5
CHN	Chillies and peppers, dry (Capsicum spp., Pimenta spp.), raw	316118	1.96641	160759
CHN	Chillies and peppers, green (Capsicum spp. and Pimenta spp.)	16753896	14.641	1.14432e+06
CHN	Cinnamon and cinnamon-tree flowers, raw	74523.4	0.704914	105720
CHN	Cloves (whole stems), raw	1348.59	0.24114	5592.57
CHN	Coconuts, in shell	327000	4.50031	72661.7
CHN	Coffee, green	114163	0.741331	153998
CHN	Cow peas, dry	15626	0.395686	39490.9
CHN	Cucumbers and gherkins	6.5157e+07	31.707	2.05497e+06
CHN	Dates	159413	5.80807	27446.7
CHN	Edible roots and tubers with high starch or inulin content, n.e.c., fresh	50583.6	6.75115	7492.59
CHN	Eggplants (aubergines)	3.3408e+07	23.9257	1.39633e+06
CHN	Figs	13741.2	3.25592	4220.37
CHN	Flax, raw or retted	10800
CHN	Ginger, raw	557811	5.83278	95633.8
CHN	Grapes	13082900	9.35482	1.39852e+06
CHN	Green corn (maize)	173634	8.79569	19740.8
CHN	Green garlic	2.00519e+07	15.6636	1.28016e+06
CHN	Groundnuts, excluding shelled	17091900	1.4324	1.19323e+07
CHN	Hazelnuts, in shell	24519.4	0.99268	24700.2
CHN	Hop cones	8201.83	1.42143	5770.14
CHN	Jute, raw or retted	29100	2.09397	13897.1
CHN	Karite nuts (sheanuts)		0.997527
CHN	Kenaf, and other textile bast fibres, raw or retted	20000	1.31607	15196.8
CHN	Kiwi fruit	2.10281e+06	13.69	153602
CHN	Leeks and other alliaceous vegetables	118479	14.9016	7950.76
CHN	Lemons and limes	2290068	13.6502	167768
CHN	Lentils, dry	171888	1.03754	165669
CHN	Lettuce and chicory	1.43519e+07	19.0797	752209
CHN	Linseed	363000	0.894832	405663
CHN	Maize (corn)	259071000	4.98183	5.20031e+07
CHN	Mangoes, guavas and mangosteens	3.02732e+06	7.12099	425126
CHN	Melonseed	28973.8	0.365112	79355.8
CHN	Millet	2547900	2.46474	1.03374e+06
CHN	Mushrooms and truffles	37120000	267.226	138909
CHN	Mustard seed	18896.9	0.744271	25389.8
CHN	Natural rubber in primary forms	817366	1.05929	771616
CHN	Oats	530177	2.46474	215104
CHN	Oil palm fruit	665381	13.1294	50678.6
CHN	Onions and shallots, dry (excluding dehydrated)	2.39687e+07	16.4524	1.45685e+06
CHN	Onions and shallots, green	862356	20.0578	42993.5
CHN	Oranges	8.24781e+06	15.87	519712
CHN	Other beans, green	1.80777e+07	12.7827	1.41423e+06
CHN	Other berries and fruits of the genus vaccinium n.e.c.	58651.8	6.4383	9109.83
CHN	Other citrus fruit, n.e.c.	5343492	8.436	633416
CHN	Other fibre crops, raw, n.e.c.		0.373869
CHN	Other fruits, n.e.c.	2.55187e+06	5.45585	467731
CHN	Other nuts (excluding wild edible nuts and groundnuts), in shell, n.e.c.	137558	1.35769	101317
CHN	Other oil seeds, n.e.c.	301000	0.76192	395055
CHN	Other pulses n.e.c.	153858	0.693528	221848
CHN	Other stimulant, spice and aromatic crops, n.e.c.	104460	2.24648	46499.6
CHN	Other stone fruits	157785	6.62653	23811.2
CHN	Other tropical fruits, n.e.c.	3.76286e+06	6.4614	582360
CHN	Other vegetables, fresh n.e.c.	1.63682e+08	12.6358	1.29538e+07
CHN	Papayas	440895	26.5499	16606.3
CHN	Peaches and nectarines	1.37976e+07	12.656	1.09021e+06
CHN	Pears	16410000	14.6345	1.12132e+06
CHN	Peas, dry	1522950	1.52322	999823
CHN	Peas, green	1.16151e+07	6.56283	1.76983e+06
CHN	Pepper (Piper spp.), raw	33124.8	0.845073	39197.6
CHN	Persimmons	3029000	4.57848	661573
CHN	Pineapples	1494800	22.4434	66603.2
CHN	Pistachios, in shell	76951.7	1.26403	60878.1
CHN	Plums and sloes	6.71599e+06	3.98017	1.68736e+06
CHN	Pomelos and grapefruits	4580136	22.1027	207221
CHN	Potatoes	88481500	17.8256	4.96374e+06
CHN	Pumpkins, squash and gourds	7.29954e+06	11.7861	619332
CHN	Quinces	110143	6.93308	15886.6
CHN	Ramie, raw or retted	50800	1.74468	29117
CHN	Rape or colza seed	13274100	1.81969	7.29469e+06
CHN	Rice	212675900	4.04349	5.25971e+07
CHN	Rye	526728	2.46474	213705
CHN	Safflower seed	33591.8	0.725215	46319.7
CHN	Seed cotton, unginned	17130303	1.95989	8.74043e+06
CHN	Sesame seed	366500	0.461944	793386
CHN	Sisal, raw	14252.6	0.797094	17880.7
CHN	Sorghum	2464900	2.46474	1.00006e+06
CHN	Soya beans	15282500	2.31084	6.61341e+06
CHN	Spinach	2.5455e+07	22.7756	1.11765e+06
CHN	Strawberries	2851100	19.3337	147468
CHN	Sugar beet	9384100	53.5595	175209
CHN	Sugar cane	104404300	61.8313	1.68854e+06
CHN	Sunflower seed	3149400	1.49408	2.10792e+06
CHN	Sweet potatoes	51449500	11.077	4.64472e+06
CHN	Tallowtree seeds	1.00704e+06	2.1895	459939
CHN	Tangerines, mandarins, clementines	17557188	11.0637	1.58692e+06
CHN	Taro	1.83844e+06	5.98104	307379
CHN	Tea leaves	11100000	1.28543	8.63523e+06
CHN	Tomatoes	5.9109e+07	31.2721	1.89015e+06
CHN	Triticale	376209	2.46474	152636
CHN	True hemp, raw or retted	124700	1.53278	81355.5
CHN	Tung nuts	370083	2.46977	149845
CHN	Unmanufactured tobacco	2391000	1.60637	1.48845e+06
CHN	Vanilla, raw	415.89	0.0665573	6248.6
CHN	Walnuts, in shell	1000000	2.79817	357377
CHN	Watermelons	63147220	28.8213	2.19099e+06
CHN	Wheat	134241300	2.46474	5.44647e+07
TWN	Apples	1451	14.732	98.4931
TWN	Apricots	15565	5.3409	2914.3
TWN	Areca nuts	102165	1.16699	87546
TWN	Asparagus	2556	4.81475	530.869
TWN	Bananas	356017	18.5703	19171.3
TWN	Barley		2.46474
TWN	Beans, dry	11641	0.781585	14894.1
TWN	Blueberries		4.99704
TWN	Broad beans and horse beans, green	78570	5.62802	13960.5
TWN	Cabbages	645090	25.8212	24982.9
TWN	Cantaloupes and other melons	69196	22.6283	3057.94
TWN	Carrots and turnips	114447	30.503	3751.99
TWN	Cassava, fresh	12202	10.4484	1167.83
TWN	Castor oil seeds		1.22905
TWN	Cauliflowers and broccoli	69963	16.7959	4165.49
TWN	Cereals n.e.c.	396.23	2.46474	160.759
TWN	Chillies and peppers, green (Capsicum spp. and Pimenta spp.)	27855	14.641	1902.54
TWN	Cocoa beans		0.401193
TWN	Coconuts, in shell	20348	4.50031	4521.47
TWN	Coffee, green	947	0.741331	1277.43
TWN	Cucumbers and gherkins	51264	31.707	1616.8
TWN	Edible roots and tubers with high starch or inulin content, n.e.c., fresh		6.75115
TWN	Eggplants (aubergines)	32015	23.9257	1338.1
TWN	Flax, raw or retted	273.18
TWN	Ginger, raw	22098	5.83278	3788.59
TWN	Grapes	92602	9.35482	9898.86
TWN	Green corn (maize)		8.79569
TWN	Green garlic	43738	15.6636	2792.33
TWN	Groundnuts, excluding shelled	63287	1.4324	44182.4
TWN	Jute, raw or retted		2.09397
TWN	Leeks and other alliaceous vegetables	23939	14.9016	1606.48
TWN	Lemons and limes	36575	13.6502	2679.44
TWN	Maize (corn)	185299	4.98183	37194.9
TWN	Mangoes, guavas and mangosteens	150559	7.12099	21143
TWN	Melonseed		0.365112
TWN	Millet	500.15	2.46474	202.922
TWN	Mushrooms and truffles	10221	267.226	38.2486
TWN	Olives	2599.55	1.41404	1838.39
TWN	Onions and shallots, dry (excluding dehydrated)	61168	16.4524	3717.88
TWN	Onions and shallots, green	111883	20.0578	5578.02
TWN	Oranges	153966	15.87	9701.72
TWN	Other beans, green	13723.4	12.7827	1073.58
TWN	Other citrus fruit, n.e.c.	69407	8.436	8227.48
TWN	Other fibre crops, raw, n.e.c.	384.07	0.373869	1027.28
TWN	Other fruits, n.e.c.	128441	5.45585	23541.9
TWN	Other oil seeds, n.e.c.	22654.4	0.76192	29733.3
TWN	Other tropical fruits, n.e.c.	414050	6.4614	64080.5
TWN	Other vegetables, fresh n.e.c.	1008235	12.6358	79791.7
TWN	Papayas	125521	26.5499	4727.75
TWN	Peaches and nectarines	23254	12.656	1837.39
TWN	Pears	117694	14.6345	8042.24
TWN	Peas, green	4096	6.56283	624.121
TWN	Persimmons	63115	4.57848	13785.1
TWN	Pineapples	553531	22.4434	24663.4
TWN	Plums and sloes	12787	3.98017	3212.68
TWN	Pomelos and grapefruits	89903	22.1027	4067.51
TWN	Potatoes	54929	17.8256	3081.47
TWN	Pumpkins, squash and gourds	53783	11.7861	4563.24
TWN	Rape or colza seed	7.85	1.81969	4.31391
TWN	Rice	1754049	4.04349	433796
TWN	Seed cotton, unginned		1.95989
TWN	Sesame seed	3415	0.461944	7392.67
TWN	Sisal, raw	3.22	0.797094	4.03967
TWN	Sorghum	2043	2.46474	828.89
TWN	Soya beans	4674	2.31084	2022.64
TWN	Spinach		22.7756
TWN	Strawberries	8908	19.3337	460.75
TWN	String beans	10692	8.12007	1316.74
TWN	Sugar cane	501705	61.8313	8114.1
TWN	Sunflower seed		1.49408
TWN	Sweet potatoes	241694	11.077	21819.5
TWN	Tangerines, mandarins, clementines	183955	11.0637	16626.9
TWN	Taro	44130	5.98104	7378.32
TWN	Tea leaves	13443	1.28543	10458
TWN	Tomatoes	111125	31.2721	3553.49
TWN	Unmanufactured tobacco	1335	1.60637	831.065
TWN	Watermelons	210661	28.8213	7309.21
TWN	Wheat	5379	2.46474	2182.38
COL	Agave fibres, raw, n.e.c.	14869	0.65205	22803.5
COL	Apples	3065	14.732	208.051
COL	Asparagus	2334.48	4.81475	484.86
COL	Avocados	308166	8.3886	36736.3
COL	Bananas	2020915	18.5703	108825
COL	Barley	5510	2.46474	2235.53
COL	Beans, dry	122783	0.781585	157095
COL	Broad beans and horse beans, dry	5991	1.72449	3474.06
COL	Broad beans and horse beans, green	33183.9	5.62802	5896.2
COL	Cabbages	66961.3	25.8212	2593.26
COL	Cantaloupes and other melons	59504	22.6283	2629.62
COL	Carrots and turnips	286505	30.503	9392.67
COL	Cashew nuts, in shell	4312	0.656501	6568.15
COL	Cassava leaves
COL	Cassava, fresh	1.05656e+06	10.4484	101121
COL	Cauliflowers and broccoli	33560	16.7959	1998.11
COL	Cereals n.e.c.	4477	2.46474	1816.42
COL	Chick peas, dry	250	0.85568	292.165
COL	Chillies and peppers, green (Capsicum spp. and Pimenta spp.)	96699	14.641	6604.68
COL	Cocoa beans	89282	0.401193	222541
COL	Coconuts, in shell	142235	4.50031	31605.6
COL	Coffee, green	851640	0.741331	1.1488e+06
COL	Cucumbers and gherkins	33664	31.707	1061.72
COL	Dates	55	5.80807	9.46958
COL	Edible roots and tubers with high starch or inulin content, n.e.c., fresh	97519	6.75115	14444.8
COL	Eggplants (aubergines)	4177	23.9257	174.582
COL	Figs	2473	3.25592	759.539
COL	Grapes	30299	9.35482	3238.87
COL	Green garlic	6717	15.6636	428.828
COL	Groundnuts, excluding shelled	6370	1.4324	4447.07
COL	Lemons and limes	237835	13.6502	17423.5
COL	Lentils, dry	1323.62	1.03754	1275.73
COL	Lettuce and chicory	165392	19.0797	8668.5
COL	Maize (corn)	1329856	4.98183	266941
COL	Mangoes, guavas and mangosteens	422038	7.12099	59266.7
COL	Natural rubber in primary forms	12000	1.05929	11328.3
COL	Oats		2.46474
COL	Oil palm fruit	7914444	13.1294	602801
COL	Onions and shallots, dry (excluding dehydrated)	815179	16.4524	49547.7
COL	Oranges	331502	15.87	20888.6
COL	Other citrus fruit, n.e.c.	575723	8.436	68246
COL	Other fruits, n.e.c.	722895	5.45585	132499
COL	Other nuts (excluding wild edible nuts and groundnuts), in shell, n.e.c.	1090	1.35769	802.833
COL	Other pulses n.e.c.		0.693528
COL	Other stimulant, spice and aromatic crops, n.e.c.	19979	2.24648	8893.46
COL	Other sugar crops n.e.c.		6.80946
COL	Other tropical fruits, n.e.c.	582142	6.4614	90095.2
COL	Other vegetables, fresh n.e.c.	125844	12.6358	9959.29
COL	Papayas	168594	26.5499	6350.09
COL	Peaches and nectarines	31198	12.656	2465.08
COL	Pears	15720	14.6345	1074.18
COL	Peas, dry	56080	1.52322	36816.8
COL	Peas, green		6.56283
COL	Pigeon peas, dry	825	0.769597	1071.99
COL	Pineapples	944210	22.4434	42070.8
COL	Plantains and cooking bananas	1312732	6.56728	199890
COL	Plums and sloes	18092	3.98017	4545.53
COL	Potatoes	3706563	17.8256	207935
COL	Pumpkins, squash and gourds	128378	11.7861	10892.3
COL	Rape or colza seed		1.81969
COL	Rice	2703100	4.04349	668507
COL	Seed cotton, unginned	23394	1.95989	11936.4
COL	Sesame seed	3238	0.461944	7009.51
COL	Sorghum	9345	2.46474	3791.47
COL	Soya beans	80106	2.31084	34665.4
COL	Spinach	6264	22.7756	275.031
COL	Strawberries	80293	19.3337	4153.01
COL	Sugar beet	30980.1	53.5595	578.423
COL	Sugar cane	23389039	61.8313	378272
COL	Sunflower seed		1.49408
COL	Tangerines, mandarins, clementines	142599	11.0637	12888.9
COL	Tea leaves	132	1.28543	102.689
COL	Tomatoes	473772	31.2721	15150
COL	Unmanufactured tobacco	16329	1.60637	10165.1
COL	Watermelons	190167	28.8213	6598.14
COL	Wheat	5478.61	2.46474	2222.79
COL	Yams	364572	7.86085	46378.2
COM	Asparagus	0.05	4.81475	0.0103848
COM	Bananas	71054	18.5703	3826.21
COM	Cassava, fresh	53932	10.4484	5161.74
COM	Cinnamon and cinnamon-tree flowers, raw		0.704914
COM	Cloves (whole stems), raw	6300	0.24114	26125.9
COM	Cocoa beans	42.6	0.401193	106.183
COM	Coconuts, in shell	73876	4.50031	16415.8
COM	Coffee, green	137.12	0.741331	184.965
COM	Cucumbers and gherkins	1863	31.707	58.7568
COM	Figs	0.01	3.25592	0.00307133
COM	Groundnuts, excluding shelled	4194	1.4324	2927.95
COM	Maize (corn)	16473	4.98183	3306.61
COM	Mushrooms and truffles	0	267.226	0
COM	Onions and shallots, green	1417	20.0578	70.6457
COM	Other fruits, n.e.c.	3908.67	5.45585	716.418
COM	Other pulses n.e.c.	16659	0.693528	24020.7
COM	Other stimulant, spice and aromatic crops, n.e.c.	61.97	2.24648	27.5854
COM	Other vegetables, fresh n.e.c.	4193.13	12.6358	331.844
COM	Pigeon peas, dry	388.64	0.769597	504.991
COM	Potatoes	2878	17.8256	161.453
COM	Rice	7	4.04349	1.73118
COM	Sisal, raw		0.797094
COM	Sweet potatoes	12158	11.077	1097.59
COM	Taro	11301	5.98104	1889.47
COM	Tomatoes	9835	31.2721	314.498
COM	Vanilla, raw	250	0.0665573	3756.16
COM	Yams	27170	7.86085	3456.37
COG	Avocados	9103	8.3886	1085.16
COG	Bananas	86049.2	18.5703	4633.7
COG	Beans, dry	4299.96	0.781585	5501.59
COG	Cabbages	1611.92	25.8212	62.4262
COG	Carrots and turnips	494.84	30.503	16.2226
[truncated: 7,764 more rows]

[truncated: 11 more sheets: A2-Pasture 1, A2-Pasture 2, A2-Forest, A2-Phosphorus, SI-A3, A3-Land, A-3 Blue water, A3-Nutrients, SI-A4, A4-Target countries, A4-Modified countries]
